# Supplementary material for: Catalytic utility of PNN-based MnI pincer complexes in the synthesis of quinolines and transfer hydrogenation of carbonyl derivatives
Source: Royal Society of Chemistry journal article supplement (doi:10.1039/d4dt00001c), 2024-01-01
Supplement: d4dt00001c1.pdf [file d4dt00001c1.pdf]

## Supporting information

### **Catalytic utility of PNN based Mn<sup>I</sup> pincer complexes in the synthesis of quinolines and transfer hydrogenation of carbonyl derivatives**

Manali A. Mohite, Sonu Sheokand, Dipanjan Mondal, and Maravanji S. Balakrishna\*

*Phosphorus Laboratory, Department of Chemistry, Indian Institute of Technology Bombay,  
Powai, Mumbai 400076, India.*

---

\*Author to whom correspondence should be addressed. E-mail: [krishna@chem.iitb.ac.in](mailto:krishna@chem.iitb.ac.in),  
[msb\\_krishna@iitb.ac.in](mailto:msb_krishna@iitb.ac.in) (M. S. Balakrishna); Fax: +91-22-5172-3480/2576-7152

## Table of content

|                                                           |         |
|-----------------------------------------------------------|---------|
| Crystal structure determination of complexes <b>2 – 4</b> | S2-S3   |
| Crystallographic information for complexes <b>2 – 5</b>   | S3      |
| NMR and HRMS spectra of complexes                         | S4-S16  |
| Controlled experiments of reaction mechanism              | S17-S21 |
| NMR spectra of catalytic products                         | S22-S88 |
| References                                                | S89     |

### Crystal structure determination of complexes.

Single crystals of all complexes were mounted on a Cryoloop with a drop of paratone oil and positioned in the cold nitrogen stream on a Bruker D8 Venture diffractometer. The data collections were performed at 100 K to 150 K using Bruker D8 Venture diffractometer with a graphite monochromated Mo K $\alpha$  radiation source ( $\lambda = 0.71073 \text{ \AA}$ ) with the  $\omega$ -scan technique. The data were reduced using CrysAlisPro Red 171.41\_64.93a software.<sup>1</sup> The structures were solved using Olex2 1.5<sup>2</sup> with the ShelXT<sup>3</sup> structure solution program using intrinsic phasing and refined with SHELXL<sup>3</sup> refinement package using least-squares minimization. All non-hydrogen atoms were refined anisotropically. Hydrogen atoms were placed in calculated positions and included as riding contributions with isotropic displacement parameters tied to those of the attached non-hydrogen atoms. The given chemical formula and other crystal data do not take into account the unknown solvent molecule(s). The reflections with error/esd more than 10 were excluded in order to avoid problems related to better refinement of the data. The data completeness is more than 99.8% in most of the cases, which is enough to guarantee a very good refinement of data. The details of X-ray structural determinations are given in Tables S1. Crystallographic data for the structures reported in this paper have been deposited with the

**Table S1** Crystallographic information of compound **2-4**

| Identification code                | <b>2</b>                                                            | <b>3</b>                                                            | <b>4</b>                                                                         |
|------------------------------------|---------------------------------------------------------------------|---------------------------------------------------------------------|----------------------------------------------------------------------------------|
| Formula                            | C <sub>30</sub> H <sub>24</sub> BrMnN <sub>5</sub> O <sub>3</sub> P | C <sub>29</sub> H <sub>24</sub> BrMnN <sub>5</sub> O <sub>2</sub> P | C <sub>30</sub> H <sub>24</sub> MnN <sub>5</sub> O <sub>3</sub> PBF <sub>4</sub> |
| Formula weight                     | 668.36                                                              | 640.35                                                              | 675.26                                                                           |
| Temperature/K                      | 150.00                                                              | 150.15                                                              | 293                                                                              |
| Crystal system                     | Triclinic                                                           | Monoclinic                                                          | Triclinic                                                                        |
| Space group                        | P-1                                                                 | P2 <sub>1</sub> /c                                                  | P-1                                                                              |
| a/Å                                | 8.7605(18)                                                          | 18.7073(13)                                                         | 8.9264(3)                                                                        |
| b/Å                                | 10.686(2)                                                           | 8.3671(6)                                                           | 13.0268(3)                                                                       |
| c/Å                                | 16.726(4)                                                           | 18.4670(11)                                                         | 13.0647(3)                                                                       |
| α/°                                | 98.226(9)                                                           | 90                                                                  | 90.870(2)                                                                        |
| β/°                                | 97.121(7)                                                           | 110.297(2)                                                          | 102.085(2)                                                                       |
| γ/°                                | 101.652(7)                                                          | 90                                                                  | 94.427(2)                                                                        |
| Volume/Å <sup>3</sup>              | 1498.9(6)                                                           | 2711.1(3)                                                           | 1480.33(7)                                                                       |
| Z                                  | 2                                                                   | 4                                                                   | 2                                                                                |
| ρ <sub>calc</sub> /cm <sup>3</sup> | 1.481                                                               | 1.569                                                               | 1.515                                                                            |
| μ/mm <sup>-1</sup>                 | 1.866                                                               | 2.057                                                               | 0.567                                                                            |
| F(000)                             | 676.0                                                               | 1296.0                                                              | 688.0                                                                            |
| Crystal size/mm <sup>3</sup>       | 0.095 × 0.072 ×<br>0.056                                            | 0.215 × 0.065 ×<br>0.045                                            | 0.095 × 0.072 ×<br>0.052                                                         |
| 2θ range, deg                      | 4.292 to 50.758                                                     | 4.644 to 56.964                                                     | 3.138 to 72.064                                                                  |
| Total no of reflection             | 42104                                                               | 25461                                                               | 62836                                                                            |
| Independent reflections            | 5342 [R <sub>int</sub> = 0.0606]                                    | 6820 [R <sub>int</sub> = 0.0498]                                    | 10908 [R <sub>int</sub> = 0.0544]                                                |
| Goodness-of-fit on F <sup>2</sup>  | 1.061                                                               | 1.072                                                               | 1.038                                                                            |
| R <sub>1</sub>                     | 0.0727                                                              | 0.0603                                                              | 0.0544                                                                           |
| WR <sub>2</sub>                    | 0.2206                                                              | 0.1700                                                              | 0.1357                                                                           |

## Synthesis of [2,6-(Me)HNC<sub>5</sub>H<sub>3</sub>N(C<sub>2</sub>HN<sub>3</sub>C<sub>6</sub>H<sub>5</sub>)] (A)

Synthesis of compound **A** was achieved through a multistep process involving Sonagashira coupling of 6-bromo-N-methylpyridine-2-amine with trimethylsilyl acetylene in dry Et<sub>3</sub>N to afford protected acetylene; which was deprotected by treatment with MeOH/K<sub>2</sub>CO<sub>3</sub>. Later acetylene derivative was treated with phenyl azide under click condition [CuSO<sub>4</sub>·5H<sub>2</sub>O and sodium ascorbate] to yield triazole derivative **A**.<sup>5</sup> The formation of **A** was confirmed by <sup>1</sup>H and <sup>13</sup>C{<sup>1</sup>H}c NMR spectroscopy. In the <sup>1</sup>H NMR spectrum of **A**, triazolic proton showed a singlet at 8.48 ppm and CH<sub>3</sub> protons appeared as a doublet at 2.95 ppm, possibly due to the coupling with NH proton (<sup>2</sup>J<sub>H-H</sub> = 8 Hz).

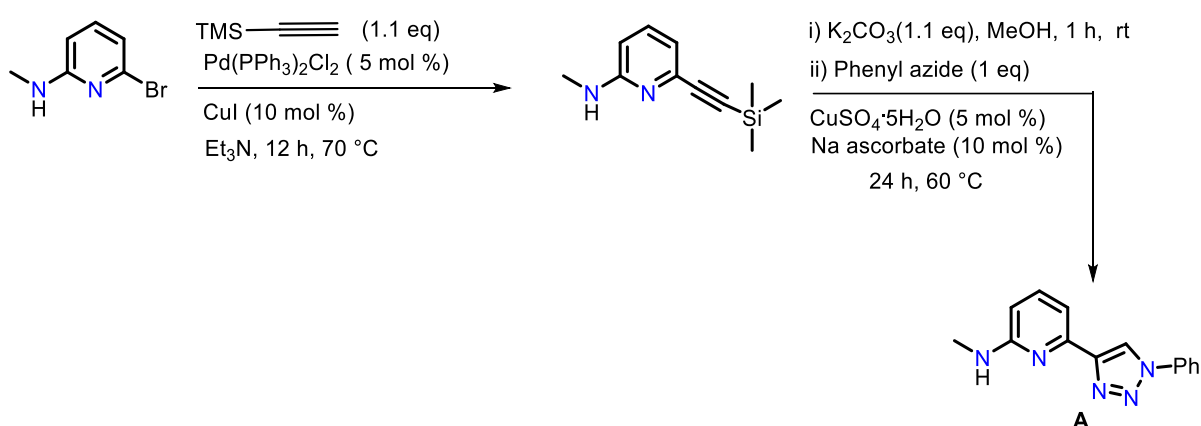

**Scheme S1.** Synthesis of **A**.

## Synthesis of compound [2,6-(Me)HNC<sub>5</sub>H<sub>3</sub>N(C<sub>2</sub>HN<sub>3</sub>C<sub>6</sub>H<sub>5</sub>)] (A)

Compound **A** was obtained by the combination of two-name reactions respectively. First 6-Bromo-N-methyl pyridine-2-amine (1000 mg, 5.34 mmol) was treated with trimethylsilyl acetylene (0.84ml, 5.88 mmol) in presence of PdCl<sub>2</sub>(PPh<sub>3</sub>)<sub>2</sub> (188 mg, 5 mol %) and CuI (102 mg, 10 mol %) in triethylamine at 60°C. The reaction mixture was stirred at room temperature for 12 h and after completion, the solution was passed through a neutral alumina pad. Then the solvent was evaporated using a rota-evaporator and the trimethylsilyl acetylene deprotected with the help of potassium carbonate in MeOH (20 mL). Deprotection was monitored with the

help of TLC, after 1 h the deprotection was complete, added 20 mL H<sub>2</sub>O. After that click reaction was performed with the help of phenyl azide (700 mg, 5.88 mmol), CuSO<sub>4</sub>·5H<sub>2</sub>O (66.84 mg, 5 mmol%), and Na ascorbate (106 mg, 10 mmol%) respectively. The reaction mixture was stirred at 60°C for 24 h. Compound A was purified with help of column chromatography (1:1, pet ether: ethyl acetate). Yield 71% (953 mg). <sup>1</sup>H NMR (400 MHz, CDCl<sub>3</sub>) δ 8.48 (s, 1H), 7.79 (d, *J* = 7.9 Hz, 2H), 7.52 (q, *J* = 7.2 Hz, 4H), 7.42 (t, *J* = 8.1 Hz, 1H), 6.38 (d, *J* = 7.3 Hz, 1H), 4.71 (br, 1H), 2.96 (s, 3H). <sup>13</sup>C{<sup>1</sup>H} NMR (101 MHz, CDCl<sub>3</sub>) δ 159.48, 149.63, 148.04, 138.38, 137.21, 129.82, 128.77, 120.56, 119.79, 109.58, 105.94, 29.17.

### NMR, HRMS and IR spectra

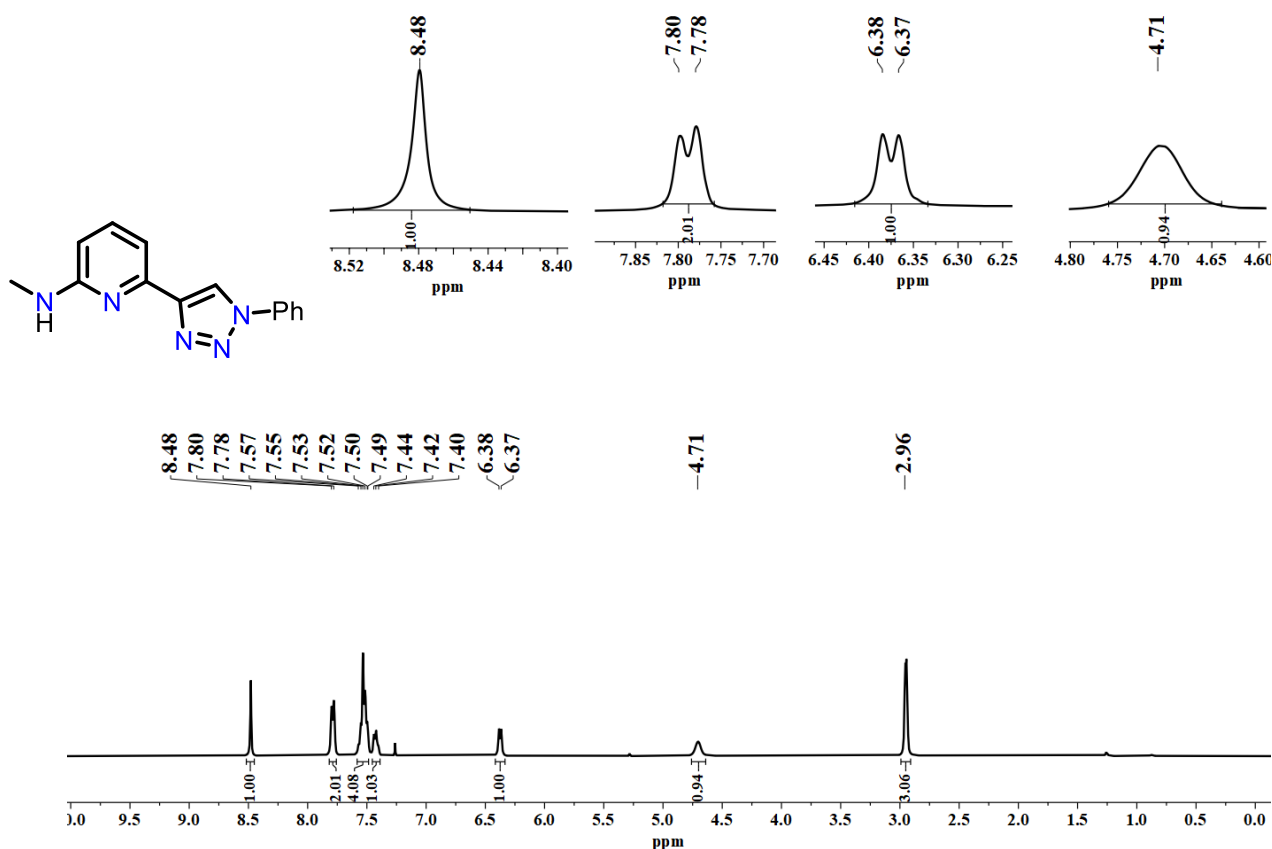

**Fig. S1.** <sup>1</sup>H NMR spectrum of A in CDCl<sub>3</sub> (400 MHz).

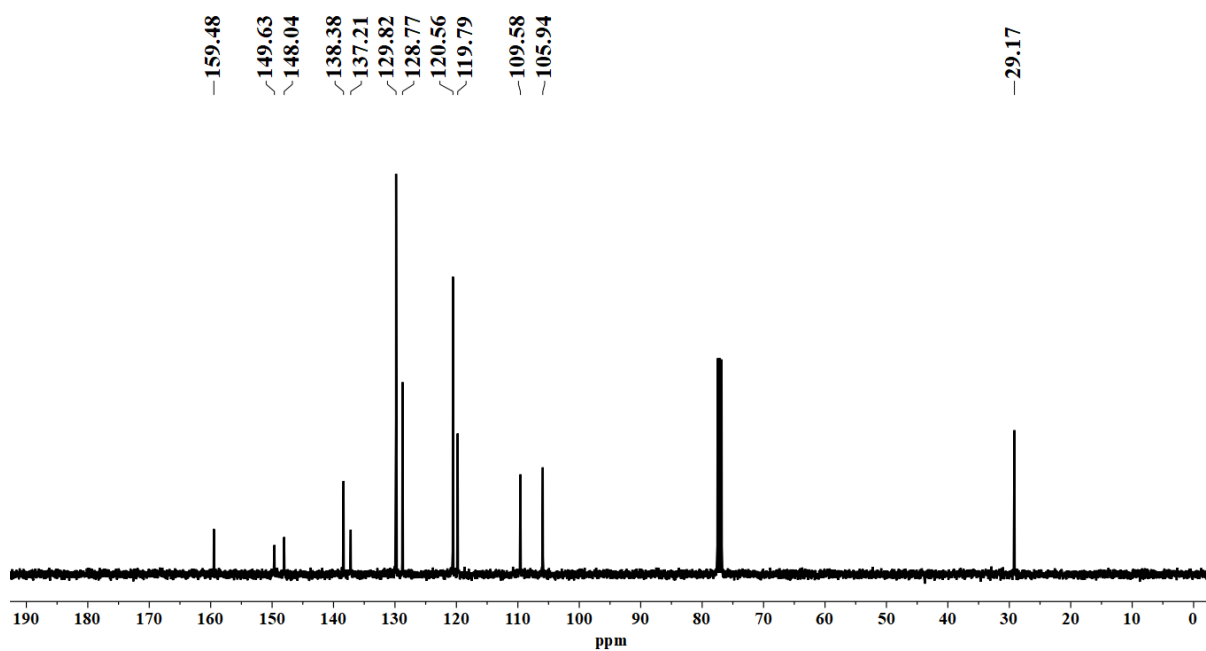

**Fig. S2.**  $^{13}\text{C}$  NMR spectrum of **A** in  $\text{CDCl}_3$  (101 MHz).

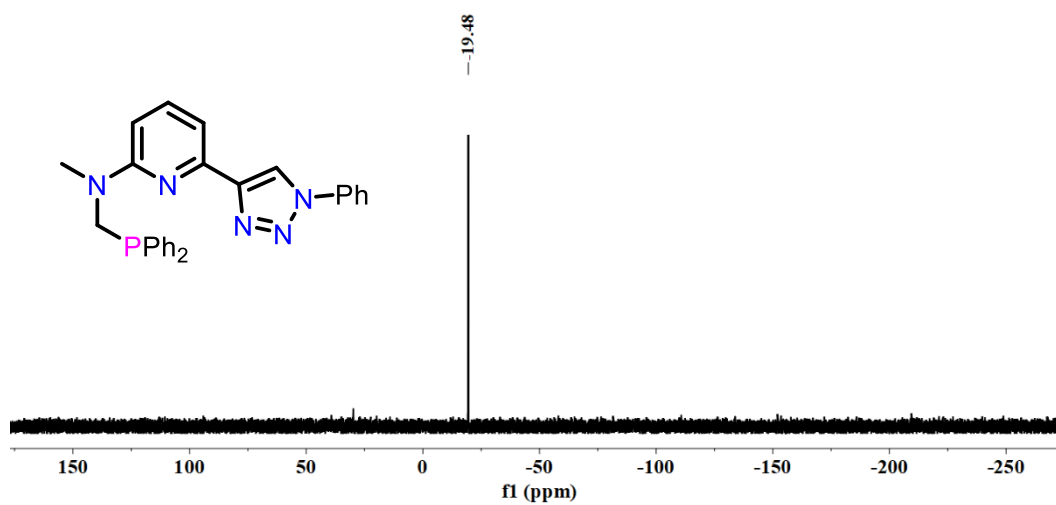

**Fig. S3.**  $^{31}\text{P}$  NMR spectrum of **1** in  $\text{CDCl}_3$  (162 MHz).

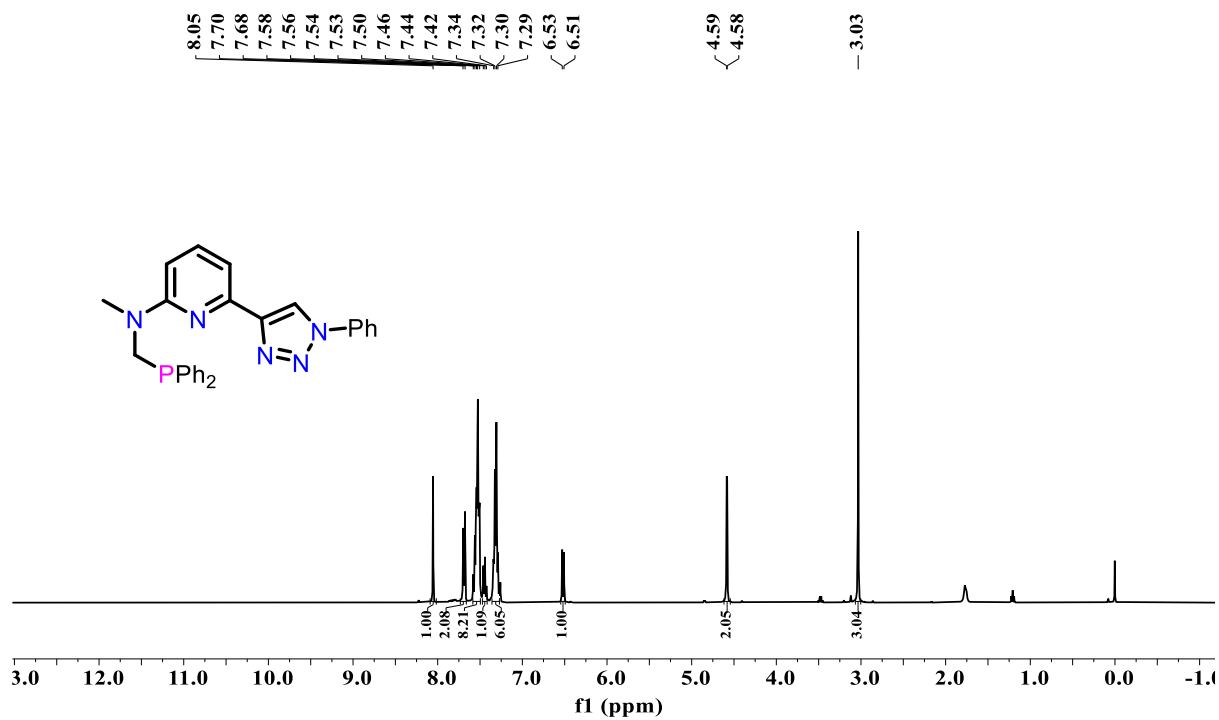

Fig. S4. <sup>1</sup>H NMR spectrum of 1 in CDCl<sub>3</sub> (400 MHz).

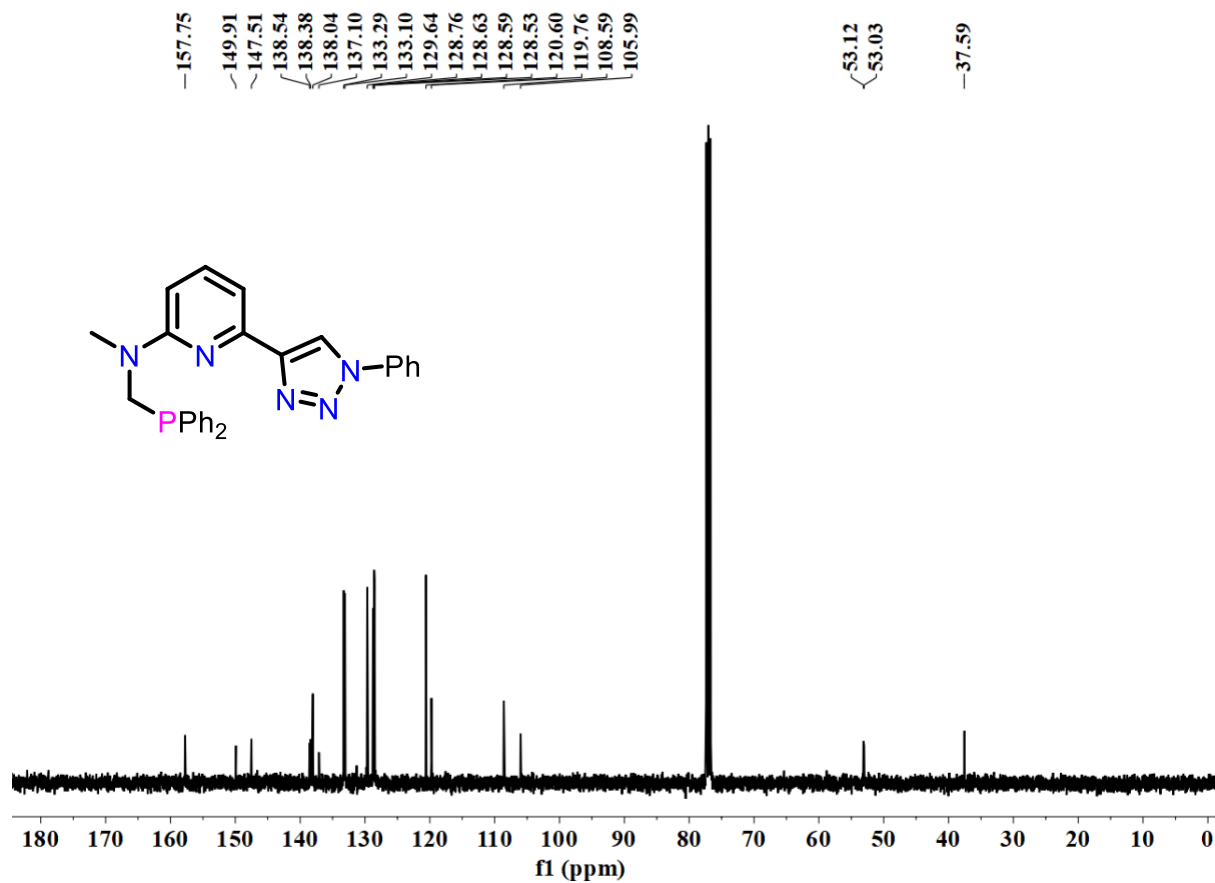

Fig. S5. <sup>13</sup>C NMR spectrum of 1 in CDCl<sub>3</sub> (101 MHz).

DEPARTMENT OF CHEMISTRY, I.I.T.(B)

**Analysis Info** Acquisition Date 12/29/2022 1:08:12 PM  
 Analysis Name D:\Data\DEC-2022\MSB-MM-TL.d  
 Method Naformat\_pos\_1000a.m Operator PG ROHAN OUT  
 Sample Name MSB-MM-TL Instrument maXis impact 282001.00081  
 Comment C27H24N5P1

**Acquisition Parameter**  
 Source Type ESI Ion Polarity Positive Set Nebulizer 0.3 Bar  
 Focus Not active Set Capillary 3700 V Set Dry Heater 180 °C  
 Scan Begin 50 m/z Set End Plate Offset -500 V Set Dry Gas 4.0 l/min  
 Scan End 1000 m/z Set Charging Voltage 2000 V Set Divert Valve Source  
 Set Corona 0 nA Set APCI Heater 0 °C

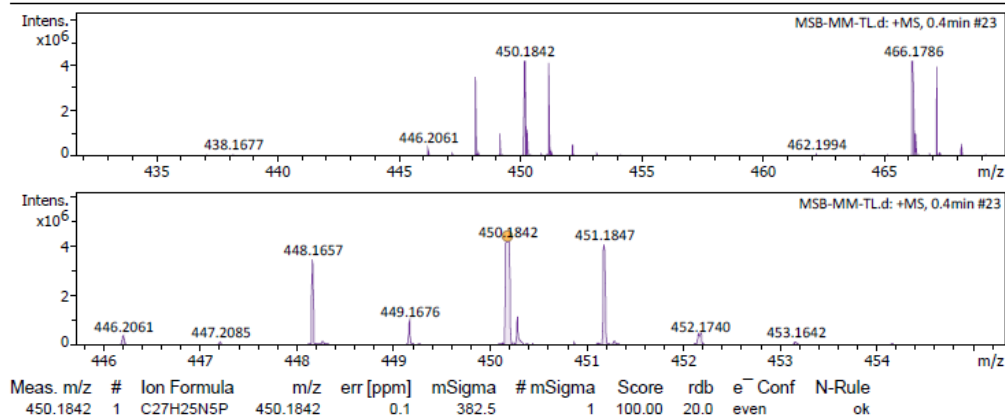

Fig. S6. HRMS spectrum of 1.

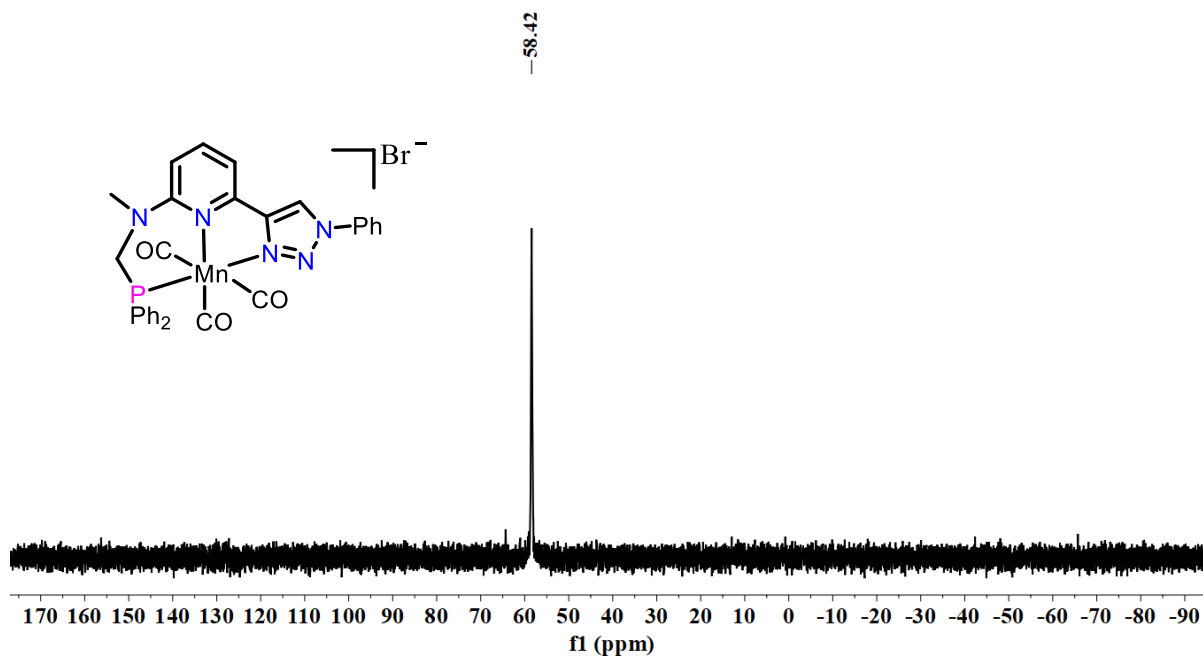

Fig. S7. <sup>31</sup>P NMR spectrum of 2 in CDCl<sub>3</sub> (162 MHz).



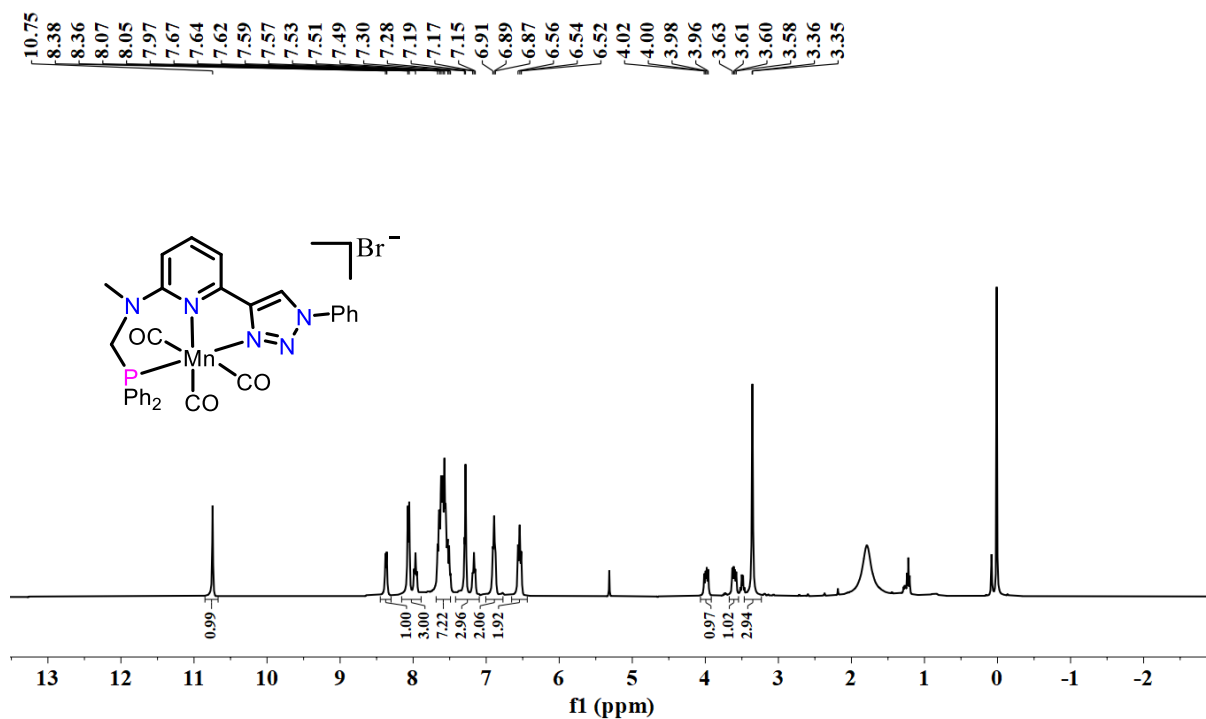

**Fig. S8.** <sup>1</sup>H NMR spectrum of **2** in CDCl<sub>3</sub> (400 MHz).

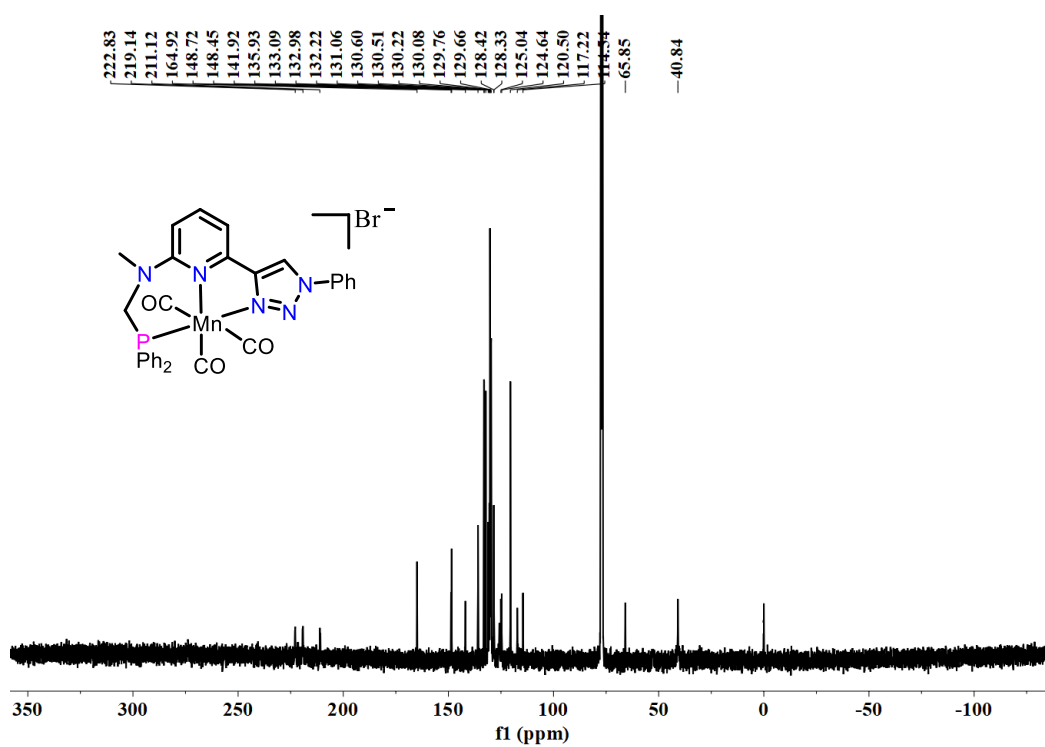

**Fig. S9.** <sup>13</sup>C NMR spectrum of **2** in CDCl<sub>3</sub> (101 MHz).

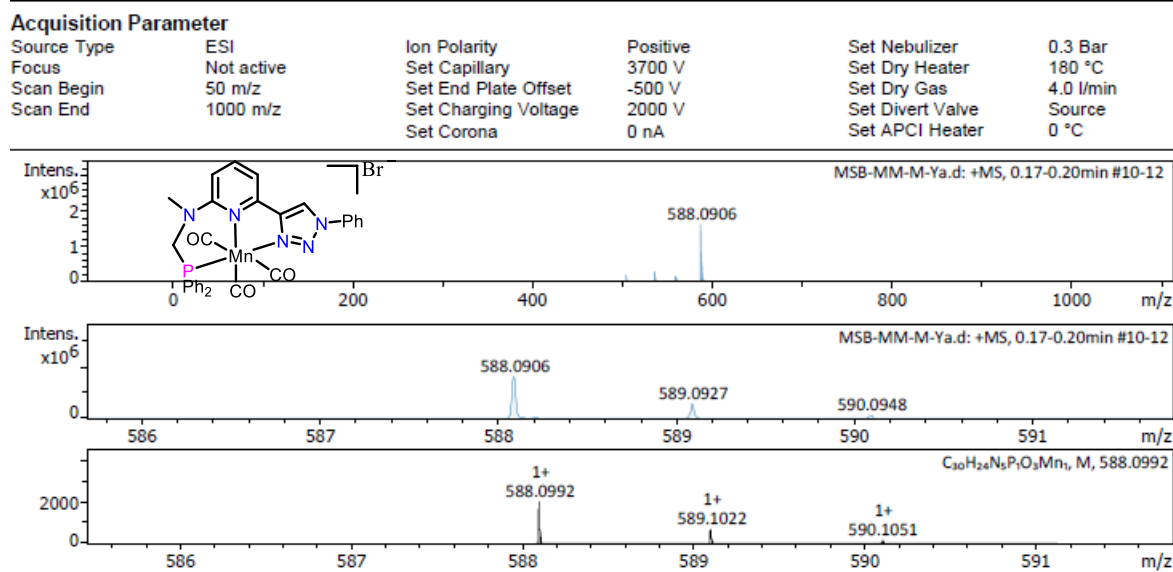

Fig. S10. HRMS spectrum of 2.

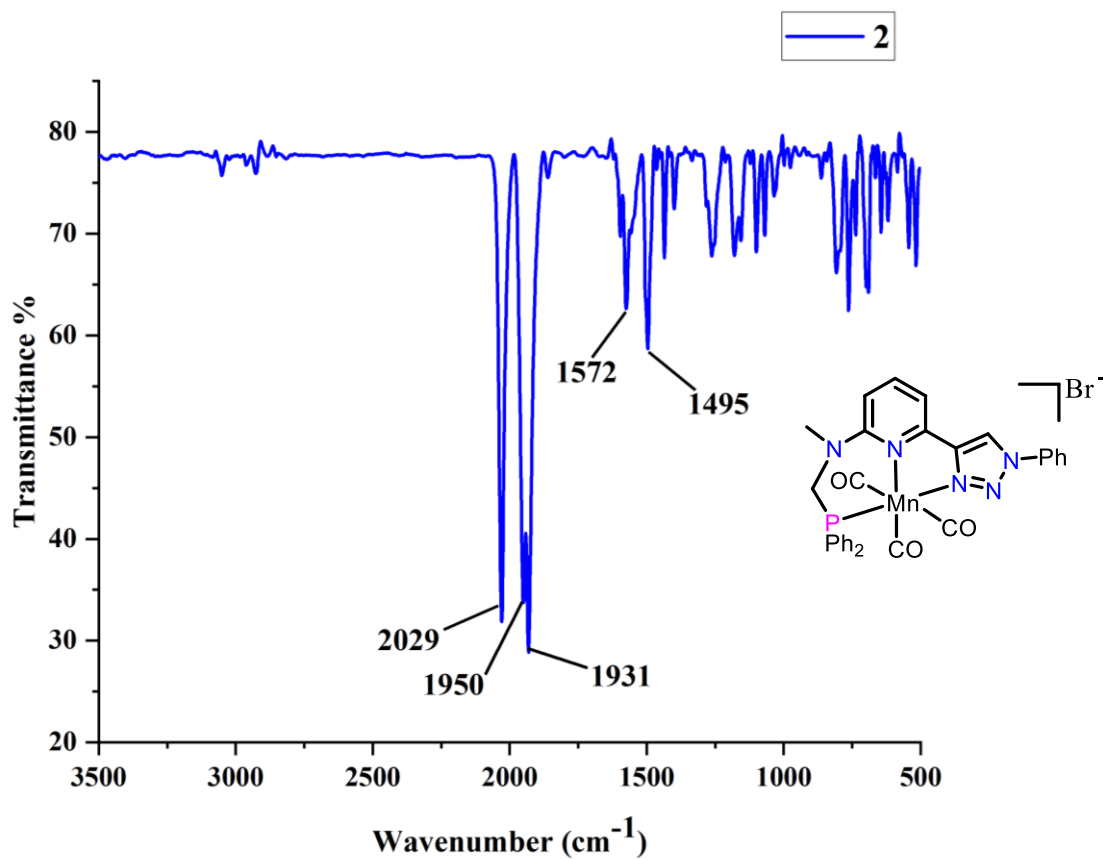

**Fig. S11.** IR spectrum of **2**.

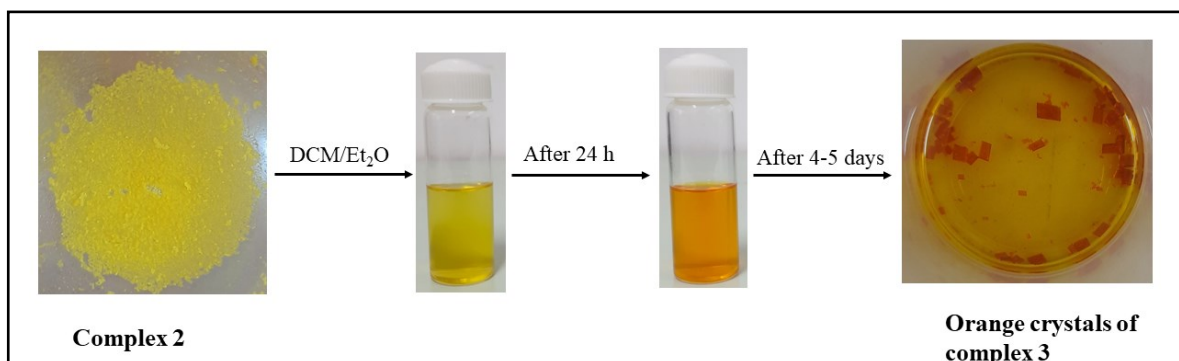

**Fig. S12.** Conversion of complex **2** into **3** in solution.

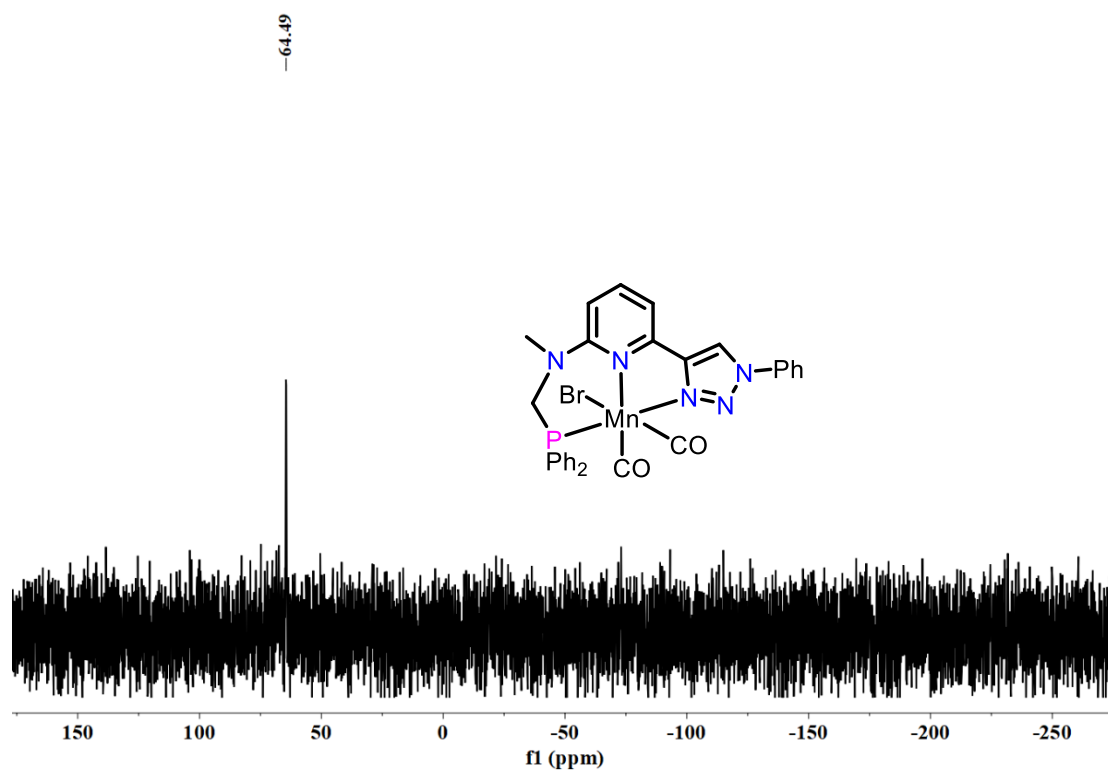

**Fig. S13.**  $^{31}\text{P}$  NMR spectrum of **3** in  $\text{DMSO-}d_6$  (162 MHz).

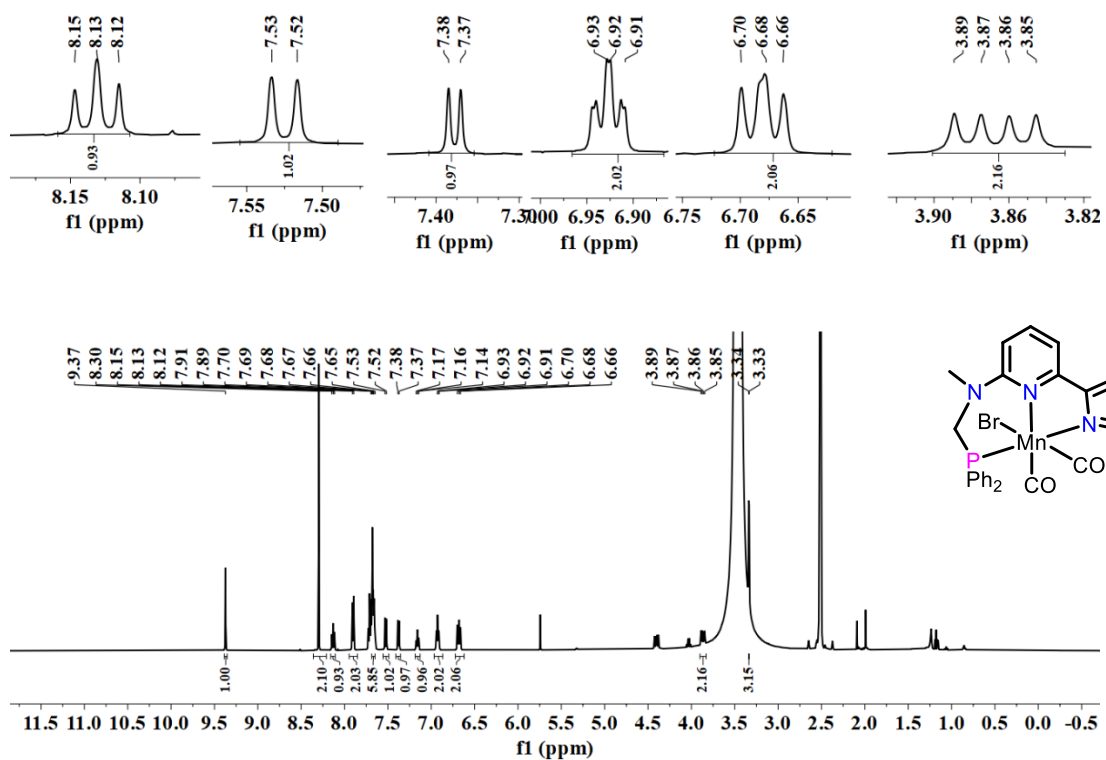

**Fig. S14.**  $^1\text{H}$  NMR spectrum of **3** in  $\text{DMSO-}d_6$  (400 MHz).

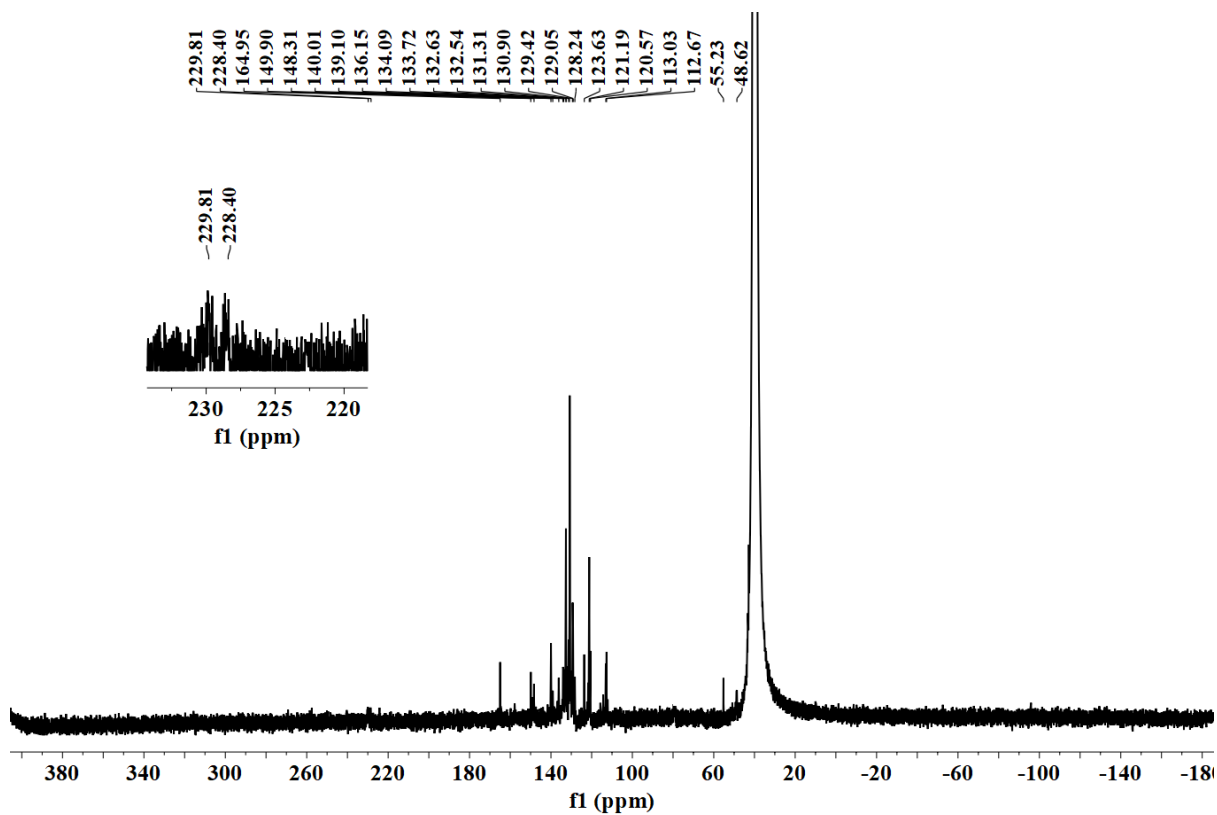

**Fig. S15.**  $^{13}\text{C}$  NMR spectrum of **3** in  $\text{DMSO-}d_6$  (101 MHz).

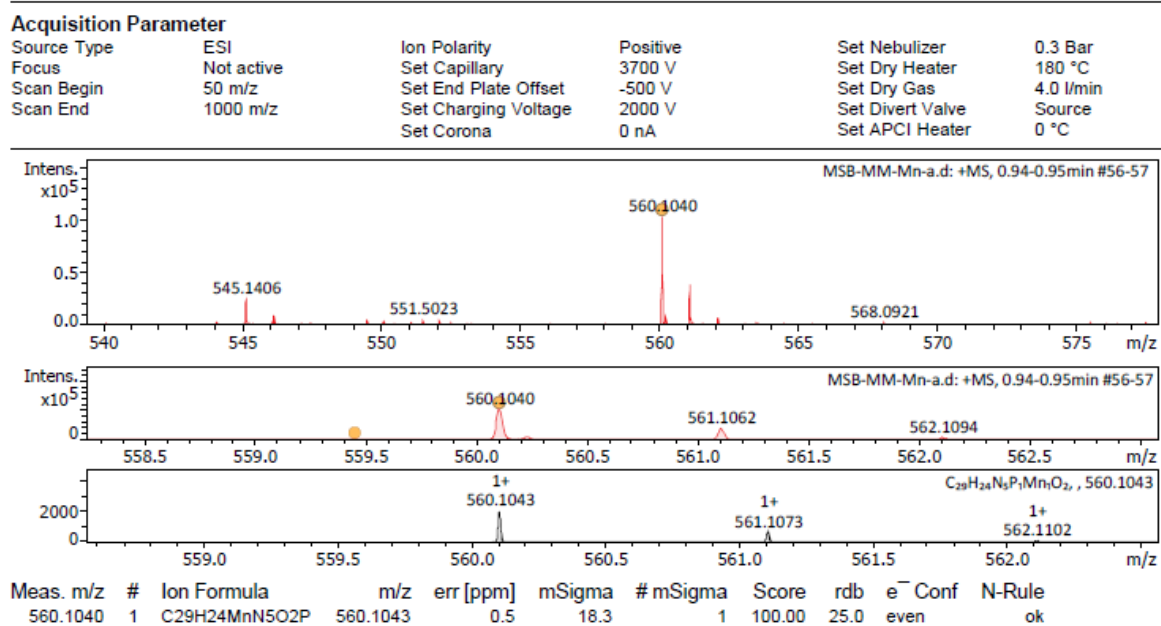

Fig. S16. HRMS spectrum of 3.

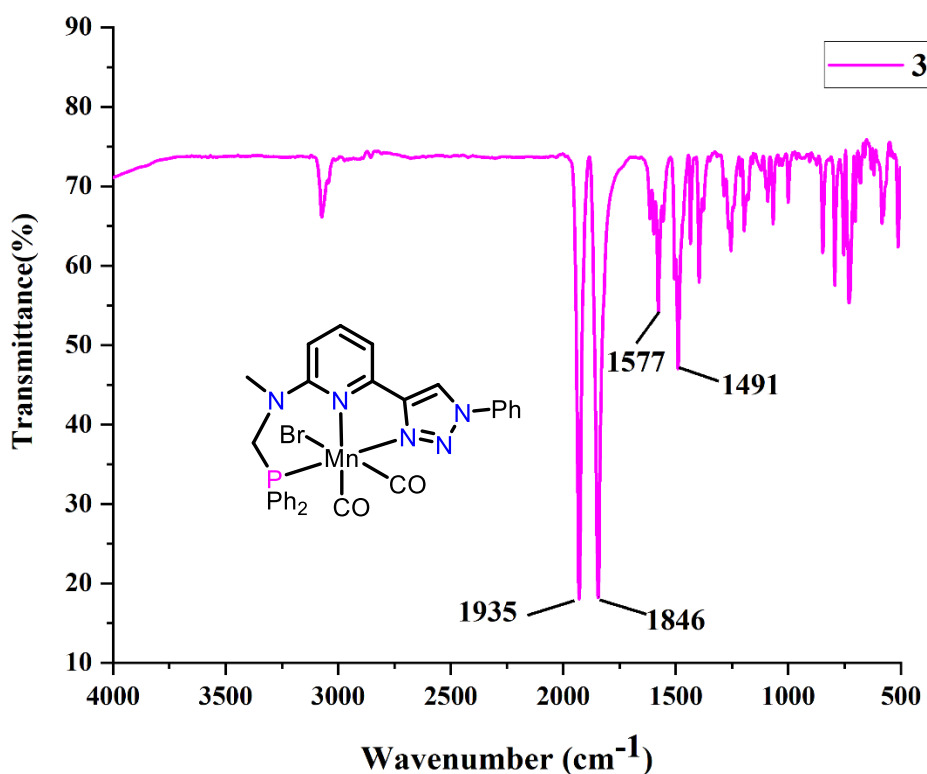

Fig. S17. IR spectrum of 3.

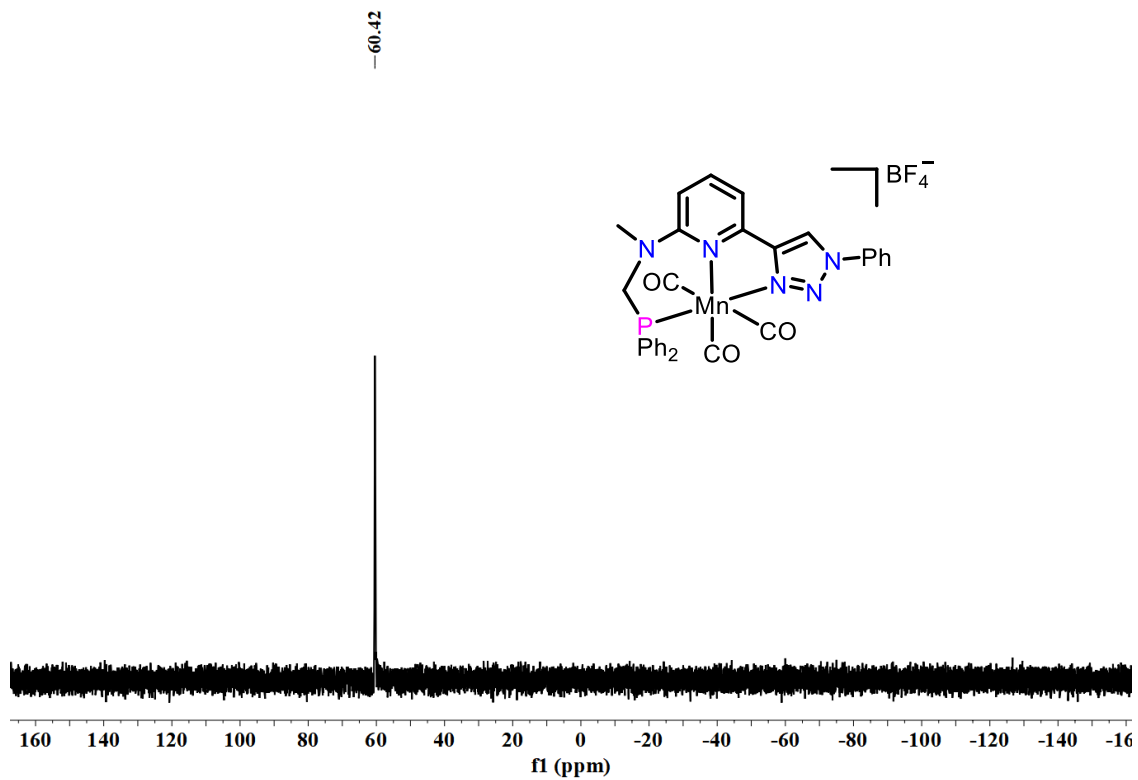

**Fig.S18.**  $^{31}\text{P}$  NMR spectrum of **4** in  $\text{DMSO-}d_6$  (162MHz).

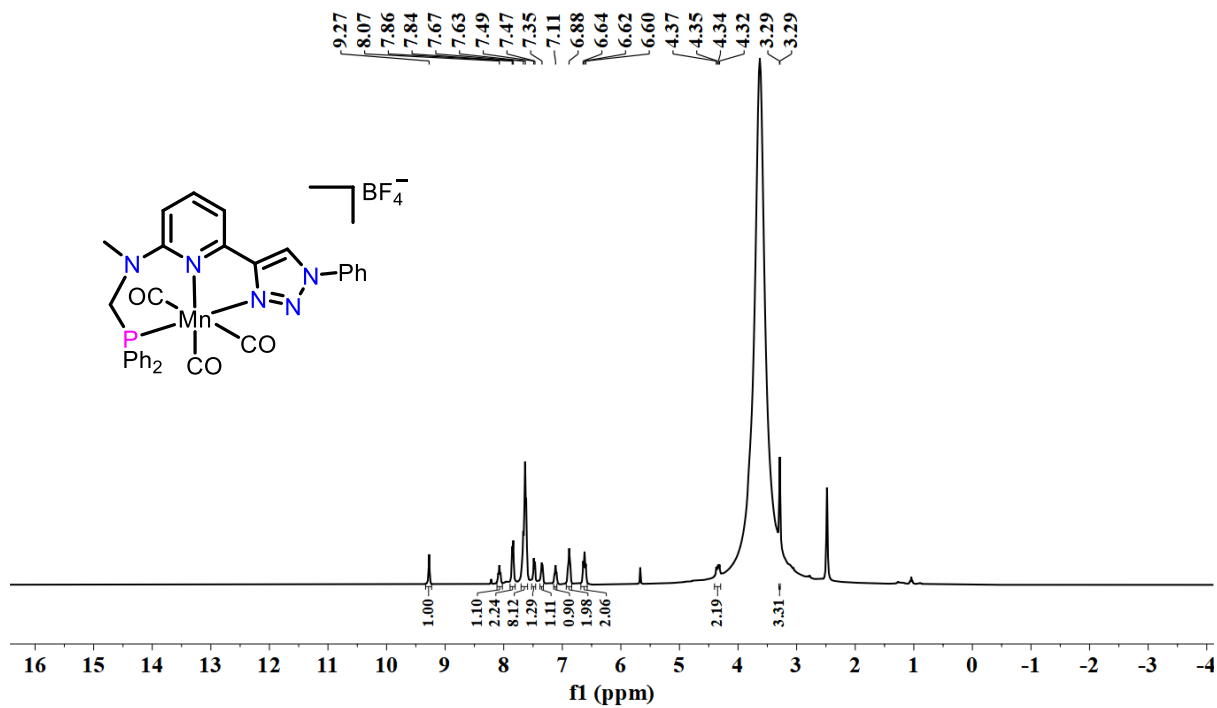

**Fig. S19.**  $^1\text{H}$  NMR spectrum of **4** in  $\text{DMSO-}d_6$  (400 MHz).

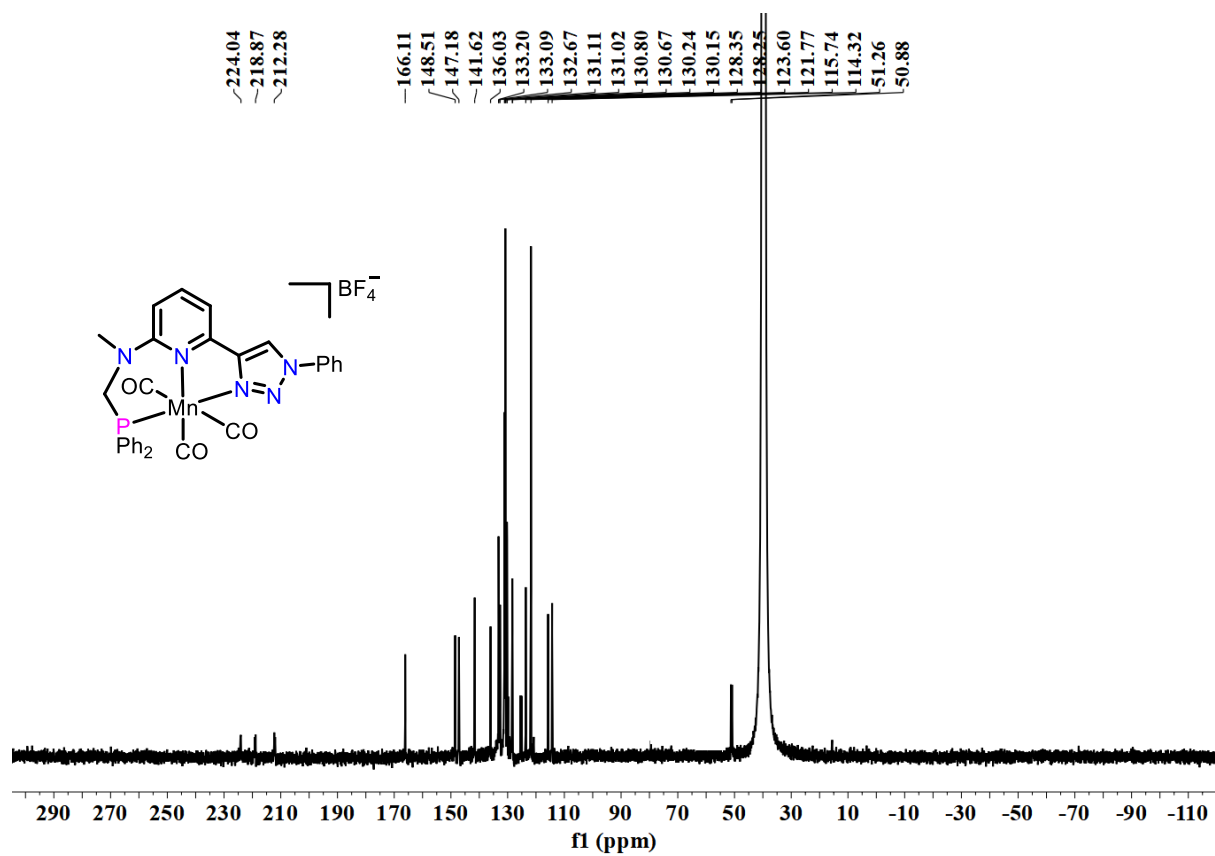

Fig. S20.  $^{13}\text{C}$  NMR spectrum of 4 in DMSO- $d_6$  (101 MHz).

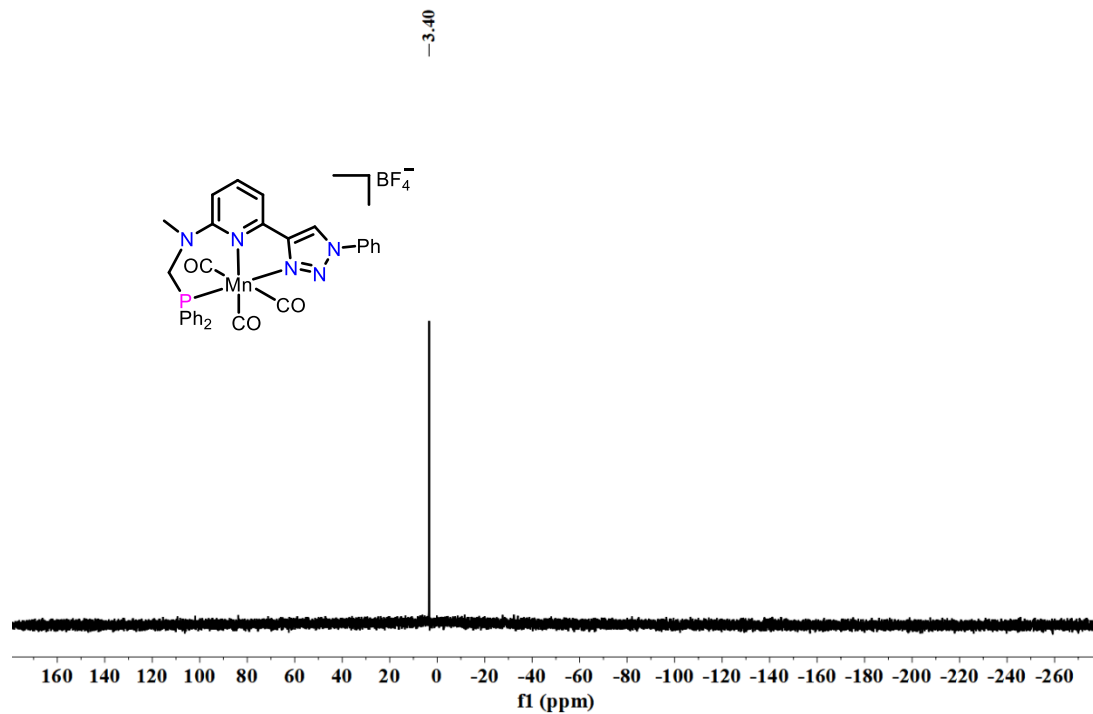

Fig. S21.  $^{11}\text{B}$  NMR spectrum of 4 in DMSO- $d_6$  (128 MHz).

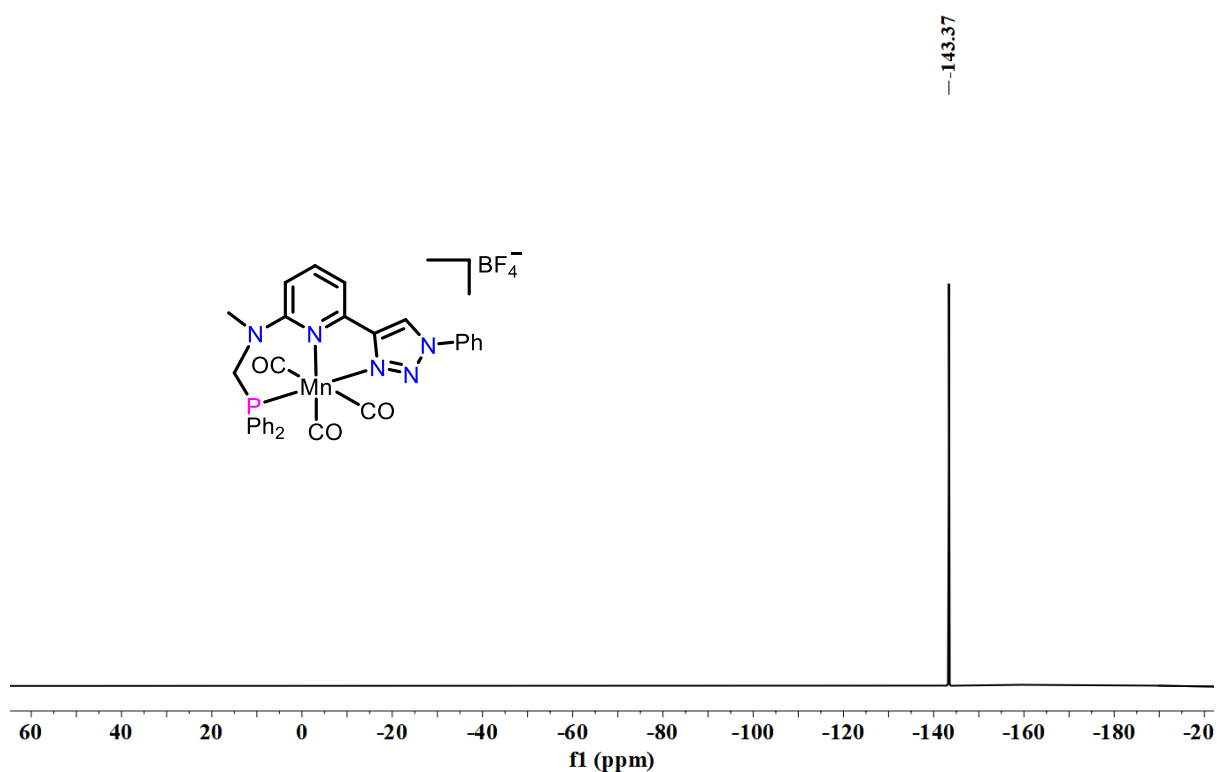

**Fig. S22.**  $^{19}\text{F}\{^1\text{H}\}$ . NMR spectrum of **4** in  $\text{DMSO-}d_6$  (376 MHz)

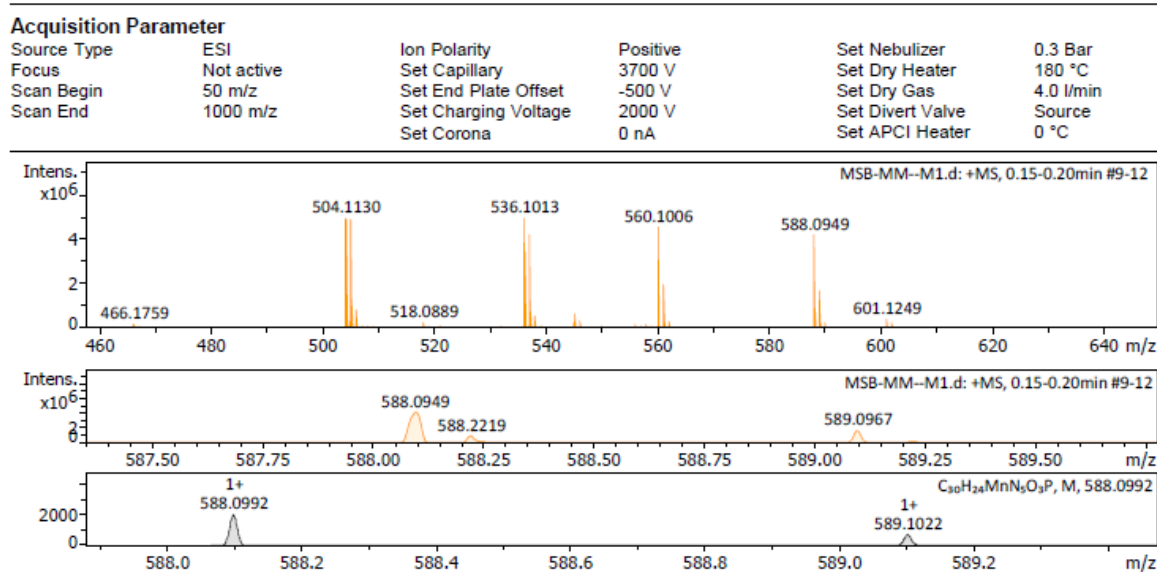

**Fig.S23.** HRMS spectrum of **4**.



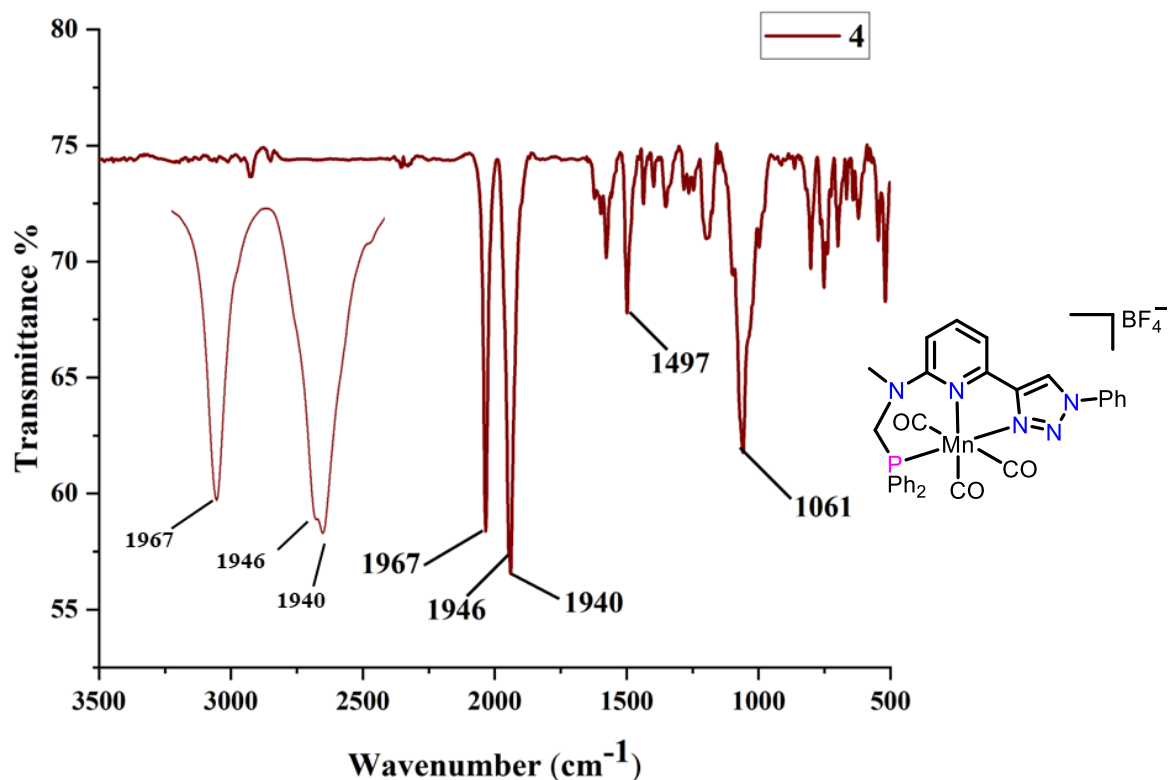

Fig. S24. IR spectrum of 4.

## Controlled experiments

### Hydrogenation of styrene by evolved hydrogen

In a catalytic tube, mixture 2-aminobenzyl alcohol (2 mmol), **3** (0.03 mol%) and KOH (0.5 equiv) was taken in toluene, catalytic tube connected to another catalytic tube in which styrene (1.0 mmol) and catalytic amount of Pd/C were placed in THF with a magnetic stirrer. The tube was capped with a Teflon screw cap, evacuated, and filled with nitrogen. The tube was then placed in an oil bath and heated at 110 °C for 12 h. GC-MS analysis of the reaction mixture present in the second catalytic tube containing styrene revealed the conversion of styrene to ethylbenzene.

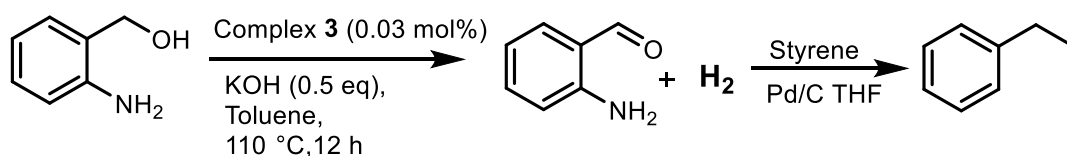

**Scheme S2.** Control experiments in the presence of external hydrogen acceptor.

| peak # | R.T. min | first scan | max scan | last scan | PK TY | peak height | corr. area | corr. % max. | % of total |
|--------|----------|------------|----------|-----------|-------|-------------|------------|--------------|------------|
| 1      | 3.589    | 4          | 12       | 24        | BV    | 15828843    | 486301602  | 45.83%       | 30.997%    |
| 2      | 3.826    | 24         | 31       | 35        | VB    | 30761633    | 1061119538 | 100.00%      | 67.636%    |
| 3      | 5.141    | 132        | 139      | 147       | BB    | 146108      | 3677661    | 0.35%        | 0.234%     |
| 4      | 10.976   | 612        | 618      | 628       | BB    | 265384      | 7521319    | 0.71%        | 0.479%     |
| 5      | 12.577   | 741        | 750      | 768       | BB    | 271105      | 10252006   | 0.97%        | 0.653%     |

Sum of corrected areas: 1568872126

CM2023.M Sun Jul 30 13:36:29 2023

**A**

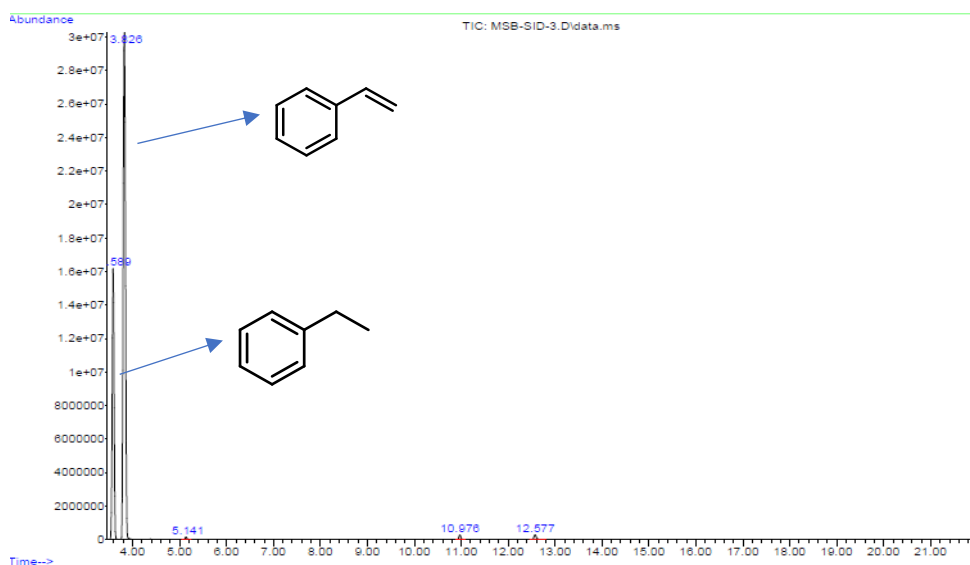

**B**

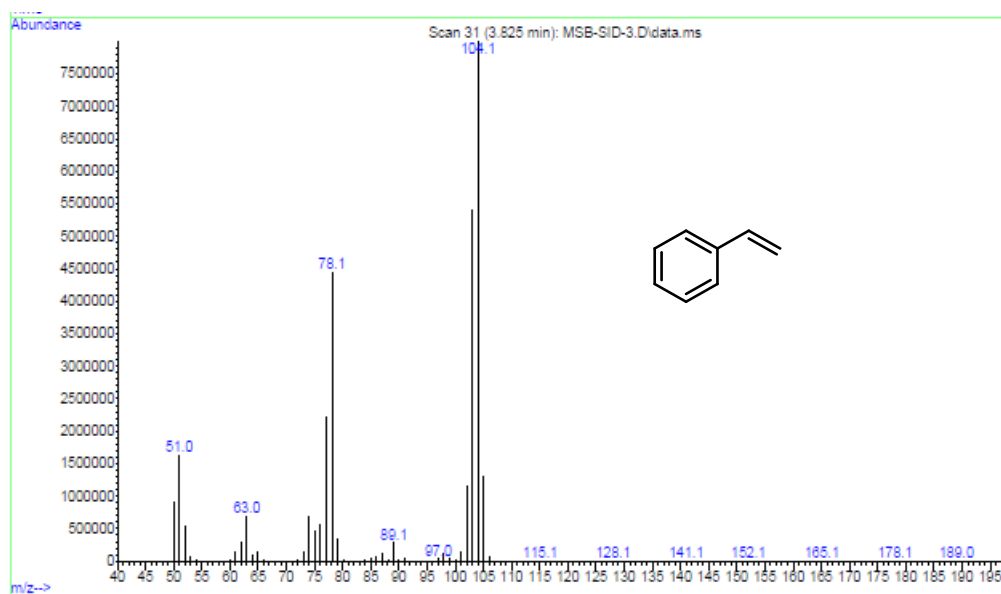

**C**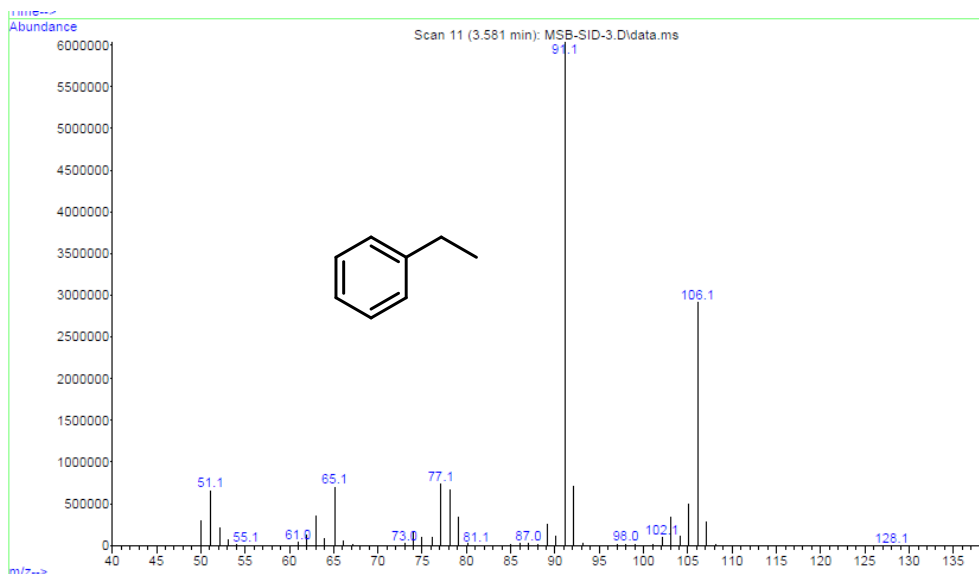

**Fig.S25.** (A) GC-MS spectrum of the reaction mixture of scheme S1 (B) GC-MS mass distribution for Styrene (C) GC-MS mass distribution for ethylbenzene.

### Evolution of H<sub>2</sub> gas

In a catalytic tube mixture 2-aminobenzyl alcohol (2 mmol), **3** (0.03 mol%) and KOH (0.5 equiv) was taken in toluene taken. The tube was capped with a Teflon screw cap, evacuated, and filled with nitrogen. The tube was then placed in an oil bath and heated at 110 °C. After 2 h gas was taken by syringe and GC analysis was done, which showed peak of H<sub>2</sub> indicates evolution of H<sub>2</sub> gas during reaction. After 8 h of reaction GC-MS of reaction mixture was taken which showed formation of aldehyde.

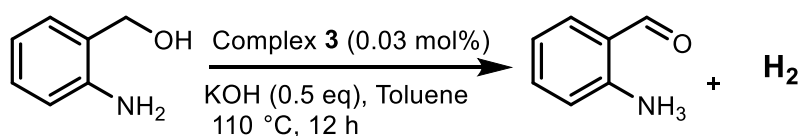

**Scheme S3.** Control experiment to check evolution of H<sub>2</sub>.

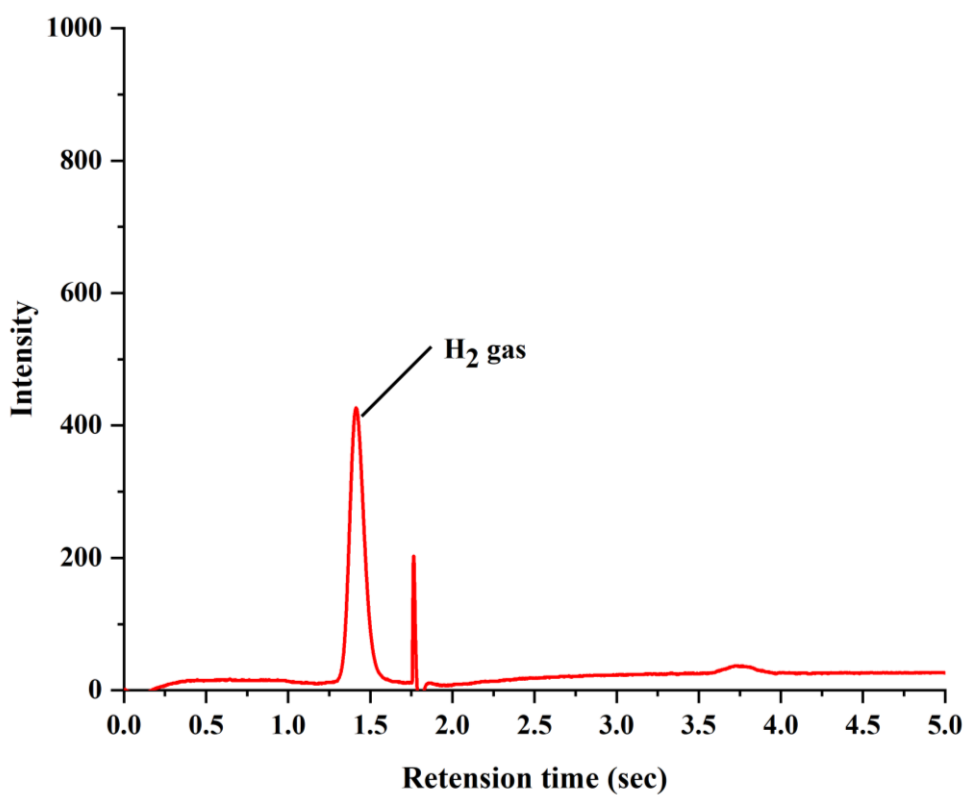

**Fig.S26.** Evidence of H<sub>2</sub> evolution from the independent reaction after 2 h.

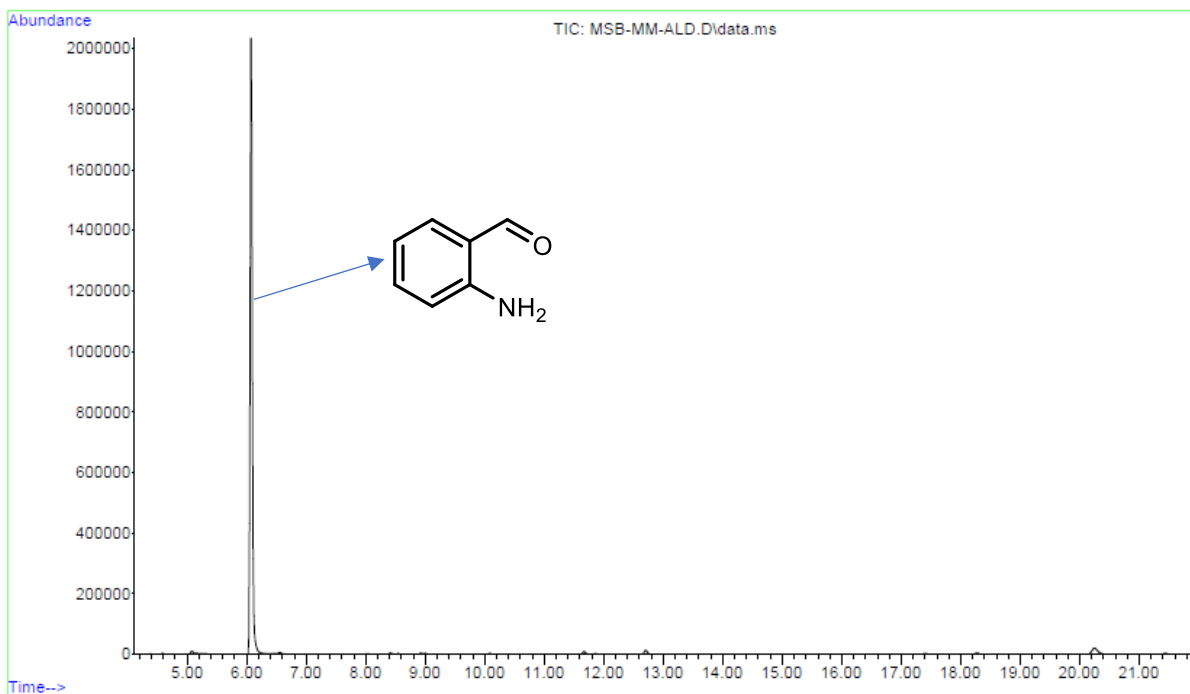

**Fig. S27.** Formation of aldehyde from the independent reaction.

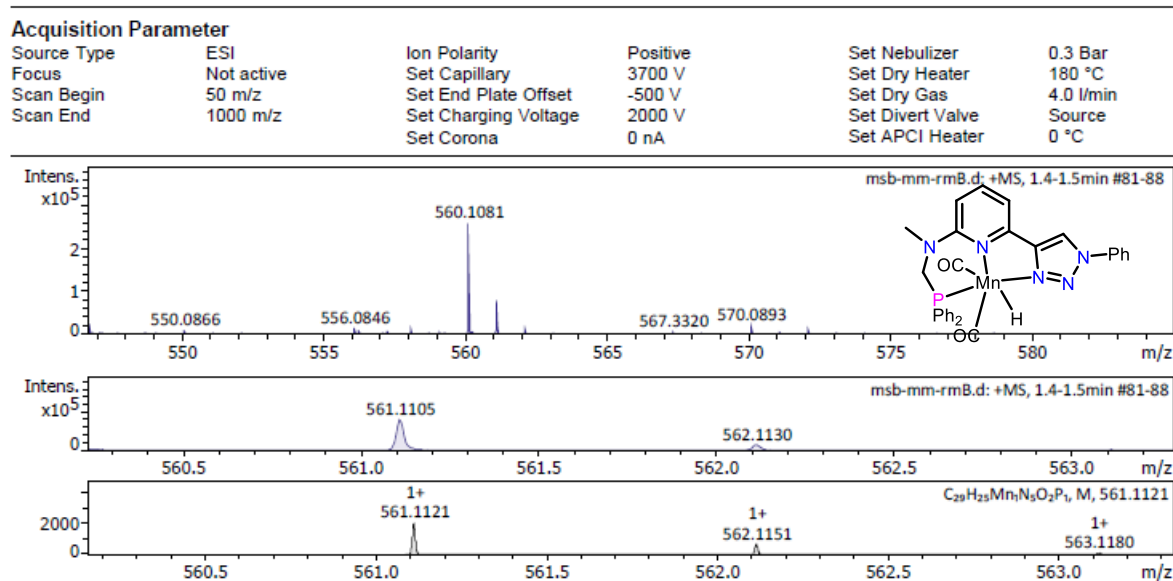

**Fig.S28.** HRMS spectrum of manganese hydride intermediate II.

### General procedure for synthesis of quinolines from 2-amino benzyl alcohol

In a catalytic tube, 2-aminobenzyl alcohol (1 mmol), ketone (1.1 mmol), complex **3** (0.03mol %), and KOH (1 equiv) in toluene (2 mL) were taken. The reaction mixture was degassed and purged with nitrogen gas for a few minutes to create a N<sub>2</sub> atmosphere. The reaction mixture was then heated at 120 °C in a preheated oil bath for 8 h followed by cooling to room temperature. Then the reaction mixture was diluted with water (2 mL) and extracted with ethyl acetate (3 × 4 mL). The resultant organic layer was dried over anhydrous Na<sub>2</sub>SO<sub>4</sub>, and the solvent was evaporated under reduced pressure. Final products were purified by silica gel column chromatography (60-120 mesh size) using petroleum ether /ethyl acetate as eluent.

### NMR spectral data of catalytic products

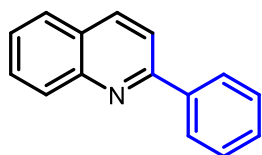

*2-phenylquinoline (1a)*<sup>4</sup> 98% (201 mg) yielded as white solid. <sup>1</sup>H NMR (500 MHz, CDCl<sub>3</sub>): δ 8.20 (t, *J* = 8.8 Hz, 4H), 7.87 (d, *J* = 8.5 Hz, 1H), 7.82 (d, *J* = 8.1 Hz, 1H), 7.77 – 7.71 (m, 1H), 7.54 (q, *J* = 6.9 Hz, 3H), 7.49 (d, *J* = 7.3 Hz, 1H). <sup>13</sup>C{<sup>1</sup>H} NMR (126 MHz, CDCl<sub>3</sub>): δ 148.4, 139.8, 136.9, 129.8, 129.7, 129.4, 128.9, 127.7, 127.6, 127.3, 126.4, 119.1.

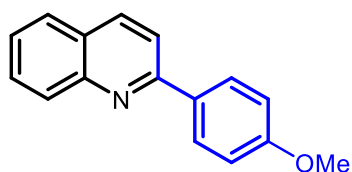

*2-(4-methoxyphenyl)quinoline (2a)*<sup>4</sup> 95% (223 mg) yielded as white solid. <sup>1</sup>H NMR (400 MHz, CDCl<sub>3</sub>): δ 8.20 – 8.10 (m, 4H), 7.79 (t, *J* = 8.0 Hz, 2H), 7.75 – 7.68 (m, 1H), 7.52 – 7.46 (m, 1H), 7.05 (d, *J* = 6.7 Hz, 2H), 3.87 (s, 3H). <sup>13</sup>C{<sup>1</sup>H} NMR (101 MHz, CDCl<sub>3</sub>): δ 160.9, 156.9, 148.3, 136.7, 132.3, 129.6, 129.5, 128.9, 127.5, 126.9, 125.9, 118.6, 114.3, 55.4.

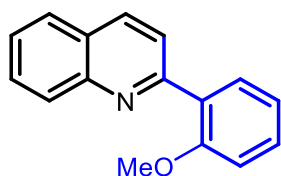

*2-(2-methoxyphenyl)quinoline (3a)*<sup>5</sup> 96% (225 mg) yielded as Colourless viscous liquid. <sup>1</sup>H NMR (400 MHz, CDCl<sub>3</sub>): δ 8.20 (d, *J* = 10.4 Hz, 1H), 8.14 (d, *J* = 7.6 Hz, 1H), 7.92 – 7.81 (m, 3H), 7.71 (dd, *J* = 9.2, 6.2 Hz, 1H), 7.56 – 7.50 (m, 1H), 7.46 – 7.39 (m, 1H), 7.18 – 7.12 (m, 1H), 7.04 (d, *J* = 9.5 Hz, 1H), 3.86 (s, 3H). <sup>13</sup>C{<sup>1</sup>H} NMR (101 MHz, CDCl<sub>3</sub>): δ 157.2, 157.2, 148.4, 135.1, 131.5, 130.4, 129.8, 129.7, 129.3, 127.4, 127.1, 126.2, 123.5, 121.3, 111.5, 55.7.

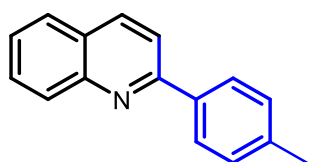

*2-(p-tolyl)quinoline (4a)*<sup>5</sup> 93% (203 mg) yielded as white solid. <sup>1</sup>H NMR (400 MHz, CDCl<sub>3</sub>): δ 8.26 – 8.17 (m, 2H), 8.13 (d, *J* = 6.3 Hz, 2H), 7.90 – 7.80 (m, 2H), 7.79 – 7.73 (m, 1H), 7.58 – 7.51 (m, 1H), 7.38 (d, *J* = 8.6 Hz, 2H), 2.48 (s, 3H). <sup>13</sup>C{<sup>1</sup>H} NMR (101 MHz, CDCl<sub>3</sub>): δ 157.4, 148.4, 139.4, 136.9, 136.7, 129.7, 129.6, 127.5, 127.2, 126.1, 118.9, 21.4.

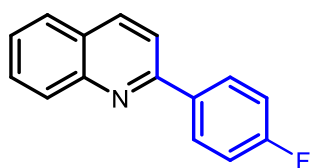

2-(4-fluorophenyl)quinoline (**5a**)<sup>4</sup> 84% (187 mg) yielded as white solid. <sup>1</sup>H NMR (400 MHz, CDCl<sub>3</sub>): δ 8.26 – 8.12 (m, 4H), 7.83 (d, *J* = 8.7 Hz, 2H), 7.78 – 7.70 (m, 1H), 7.57 – 7.50 (m, 1H), 7.25 – 7.17 (m, 2H). <sup>13</sup>C{<sup>1</sup>H} NMR (101 MHz, CDCl<sub>3</sub>): δ 165.1, 162.6, 156.3, 148.2, 136.9, 135.9, 135.8, 129.8, 129.7, 129.5, 129.4, 127.5, 127.1, 126.4, 118.7, 115.9, 115.7. <sup>19</sup>F NMR (376 MHz, CDCl<sub>3</sub>) δ -112.47.

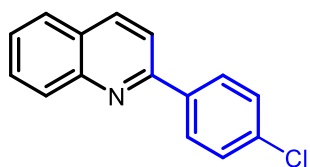

2-(4-chlorophenyl)quinoline (**6a**)<sup>6</sup> 88% (210 mg) yielded as white solid. <sup>1</sup>H NMR (500 MHz, CDCl<sub>3</sub>): δ 8.23 – 8.14 (m, 2H), 8.12 (d, *J* = 6.6 Hz, 2H), 7.82 (d, *J* = 8.5 Hz, 2H), 7.77 – 7.71 (m, 1H), 7.53 (t, *J* = 6.9 Hz, 1H), 7.51 – 7.46 (m, 2H). <sup>13</sup>C{<sup>1</sup>H} NMR (126 MHz, CDCl<sub>3</sub>): δ 156.0, 148.3, 138.1, 137.0, 135.6, 129.9, 129.7, 129.0, 128.8, 127.5, 127.2, 126.5, 118.6.

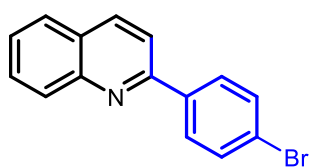

2-(4-bromophenyl)quinoline (**7a**)<sup>6</sup> 90% (255 mg) yielded as white solid. <sup>1</sup>H NMR (500 MHz, CDCl<sub>3</sub>): δ 8.16 (d, *J* = 8.5 Hz, 2H), 8.04 (d, *J* = 6.4 Hz, 2H), 7.82 – 7.71 (m, 3H), 7.64 (d, *J* = 8.5 Hz, 2H), 7.53 (t, *J* = 7.5 Hz, 1H). <sup>13</sup>C{<sup>1</sup>H} NMR (126 MHz, CDCl<sub>3</sub>): δ 156.0, 148.2, 138.5, 137.0, 132.0, 129.9, 129.7, 129.1, 127.5, 127.3, 126.6, 124.0, 118.5.

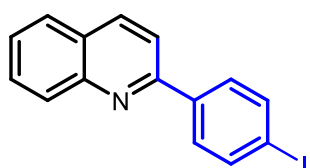

2-(4-iodophenyl)quinoline (**8a**)<sup>6</sup> 92% (304 mg) yielded as white solid. <sup>1</sup>H NMR (400 MHz, CDCl<sub>3</sub>): δ 8.18 (dd, *J* = 17.8, 8.0 Hz, 2H), 7.91 (d, *J* = 8.7 Hz, 2H), 7.88 – 7.79 (m, 4H), 7.76 – 7.71

(m, 1H), 7.56 – 7.51 (m, 1H).  $^{13}\text{C}\{^1\text{H}\}$  NMR (101 MHz,  $\text{CDCl}_3$ ):  $\delta$  156.2, 148.3, 139.1, 138.0, 137.0, 129.9, 129.7, 129.3, 127.5, 127.3, 126.5, 118.5, 95.9.

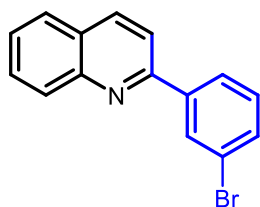

2-(3-bromophenyl)quinoline (**9a**)<sup>4</sup> 81% (229 mg) yielded as yellowish solid.  $^1\text{H}$  NMR (400 MHz,  $\text{CDCl}_3$ ):  $\delta$  8.36 (d,  $J = 1.8$  Hz, 1H), 8.25 – 8.15 (m, 2H), 8.07 (dt,  $J = 7.8, 1.4$  Hz, 1H), 7.83 (d,  $J = 8.2$  Hz, 2H), 7.78 – 7.72 (m, 1H), 7.62 – 7.52 (m, 2H), 7.39 (t,  $J = 7.9$

Hz, 1H).  $^{13}\text{C}\{^1\text{H}\}$ MR (101 MHz,  $\text{CDCl}_3$ ):  $\delta$  155.6, 148.2, 141.7, 137.0, 132.2, 130.7, 130.3, 129.9, 129.8, 127.5, 127.4, 126.7, 126.1, 123.2, 118.7.

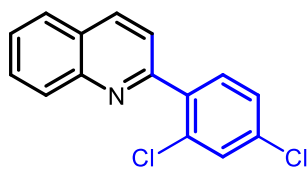

2-(2,4-dichlorophenyl)quinoline (**10a**) 94% (257 mg) yielded as white solid.  $^1\text{H}$  NMR (400 MHz,  $\text{CDCl}_3$ ):  $\delta$  8.19 (dd,  $J = 15.3, 8.4$  Hz, 2H), 7.86 (d,  $J = 6.4$  Hz, 1H), 7.79 – 7.70 (m, 2H), 7.66

(d,  $J = 8.3$  Hz, 1H), 7.62 – 7.50 (m, 2H), 7.39 (dd,  $J = 8.3, 2.1$  Hz, 1H).  $^{13}\text{C}\{^1\text{H}\}$  NMR (101 MHz,  $\text{CDCl}_3$ ):  $\delta$  156.3, 148.1, 138.2, 135.9, 135.2, 133.1, 132.7, 129.9, 129.7, 127.6, 127.5, 127.2, 127.0, 122.5.

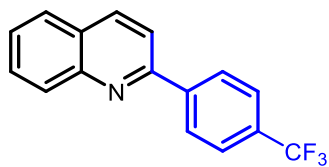

2-(4-(trifluoromethyl)phenyl)quinoline (**11a**)<sup>7</sup> 80% (218 mg) yielded as white solid.  $^1\text{H}$  NMR (400 MHz,  $\text{CDCl}_3$ ):  $\delta$  8.32 – 8.14 (m, 4H), 7.84 (dd,  $J = 8.3, 3.7$  Hz, 2H), 7.76 (t,  $J = 8.1$  Hz,

3H), 7.60 – 7.53 (m, 1H).  $^{13}\text{C}\{^1\text{H}\}$  NMR (101 MHz,  $\text{CDCl}_3$ ):  $\delta$  155.6, 148.3, 142.9, 137.1, 131.2, 130.9, 130.0, 129.9, 127.8, 127.6, 127.5, 126.9, 125.8, 125.8, 125.7, 125.7, 123.0, 118.8.  $^{19}\text{F}$  NMR (376 MHz,  $\text{CDCl}_3$ )  $\delta$  -62.49.



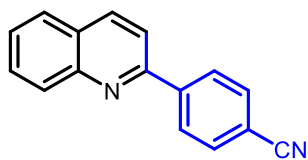

*4-(quinolin-2-yl)benzonitrile (12a)*<sup>8</sup> 84% (193 mg) yielded as white solid. <sup>1</sup>H NMR (400 MHz, CDCl<sub>3</sub>): δ 8.33 – 8.25 (m, 3H), 8.18 (d, *J* = 7.4 Hz, 1H), 7.88 (t, *J* = 8.4 Hz, 2H), 7.83 – 7.75 (m, 3H), 7.59 (t, *J* = 7.6 Hz, 1H). <sup>13</sup>C{<sup>1</sup>H} NMR (101 MHz, CDCl<sub>3</sub>): δ 154.9, 148.3, 143.7, 137.3, 132.6, 130.2, 129.9, 128.1, 127.7, 127.6, 127.2, 118.9, 118.7, 112.8.

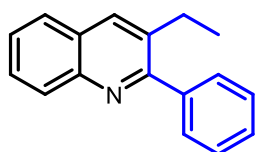

*3-ethyl-2-phenylquinoline (13a)* 89% (207 mg) yielded as colourless liquid. <sup>1</sup>H NMR (400 MHz, CDCl<sub>3</sub>): δ 8.16 (d, *J* = 7.6 Hz, 1H), 8.08 (s, 1H), 7.84 (d, *J* = 9.9 Hz, 1H), 7.72 – 7.66 (m, 1H), 7.60 – 7.46 (m, 6H), 2.86 – 2.80 (m, 2H), 1.22 (t, *J* = 7.5 Hz, 3H). <sup>13</sup>C{<sup>1</sup>H} NMR (101 MHz, CDCl<sub>3</sub>): δ 160.7, 146.4, 140.9, 135.3, 135.0, 129.3, 128.8, 128.8, 128.3, 128.1, 127.8, 127.0, 126.4, 26.1, 14.8.

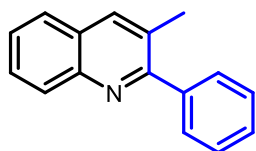

*3-methyl-2-phenylquinoline (14a)*<sup>5</sup> 88% (192 mg) yielded as colourless liquid. <sup>1</sup>H NMR (400 MHz, CDCl<sub>3</sub>): δ 8.15 (d, *J* = 8.6 Hz, 1H), 8.00 (s, 1H), 7.78 (d, *J* = 9.9 Hz, 1H), 7.69 – 7.64 (m, 1H), 7.60 (d, *J* = 9.6 Hz, 2H), 7.49 (td, *J* = 15.3, 7.0 Hz, 4H), 2.46 (d, *J* = 1.0 Hz, 3H). <sup>13</sup>C{<sup>1</sup>H} NMR (101 MHz, CDCl<sub>3</sub>): δ 160.6, 146.7, 140.9, 136.8, 129.3, 129.4, 128.9, 128.8, 128.4, 128.2, 127.6, 126.8, 126.5, 20.7.

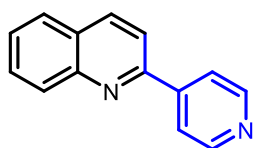

*2-(pyridin-4-yl)quinoline (15a)*<sup>6</sup> 79% (162 mg) yielded as colourless liquid. <sup>1</sup>H NMR (400 MHz, CDCl<sub>3</sub>): δ 8.75 (d, *J* = 5.9 Hz, 2H), 8.29 – 8.13 (m, 2H), 8.03 (d, *J* = 6.2 Hz, 2H), 7.85 (dd, *J* = 10.1, 8.3 Hz, 2H), 7.75 (t, *J* = 8.5 Hz, 1H), 7.60 – 7.52 (m, 1H). <sup>13</sup>C{<sup>1</sup>H} NMR (101 MHz, CDCl<sub>3</sub>): δ 154.4, 150.5, 148.3, 146.6, 137.3, 130.0, 130.0, 127.7, 127.6, 127.24, 121.7, 118.4.

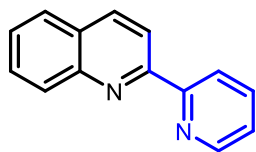

*2-(pyridin-2-yl)quinoline (16a)*<sup>6</sup> 75% (154 mg) yielded as colourless liquid. <sup>1</sup>H NMR (500 MHz, CDCl<sub>3</sub>): δ 8.74 (d, *J* = 5.5 Hz, 1H), 8.66 (d, *J* = 7.9 Hz, 1H), 8.57 (d, *J* = 8.5 Hz, 1H), 8.28 (d, *J* = 8.5 Hz, 1H), 8.19 (d, *J* = 8.5 Hz, 1H), 7.92 – 7.79 (m, 2H), 7.73 (t, *J* = 6.9 Hz, 1H), 7.59 – 7.51 (m, 1H), 7.39 – 7.32 (m, 1H). <sup>13</sup>C{<sup>1</sup>H} NMR (126 MHz, CDCl<sub>3</sub>): δ 156.4, 156.19, 149.2, 148.0, 137.0, 136.8, 129.8, 129.6, 128.3, 127., 126.8, 124.1, 121.9, 119.0.

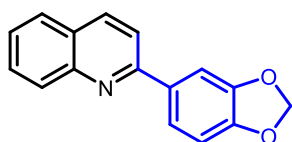

*2-(benzo[d][1,3]dioxol-5-yl)quinoline (17a)*<sup>5</sup> 83% (206 mg) yielded as white solid. <sup>1</sup>H NMR (500 MHz, CDCl<sub>3</sub>): δ 8.14 (t, *J* = 7.9 Hz, 2H), 7.82 – 7.74 (m, 3H), 7.73 – 7.69 (m, 1H), 7.66 (d, *J* = 8.2 Hz, 1H), 7.50 (t, *J* = 7.6 Hz, 1H), 6.95 (d, *J* = 8.1 Hz, 1H), 6.03 (s, 2H). <sup>13</sup>C{<sup>1</sup>H} NMR (126 MHz, CDCl<sub>3</sub>): δ 156.7, 148.9, 148., 148.2, 136.7, 134.2, 129.66, 129.6, 127.4, 127.0, 126.1, 121.8, 118.6, 108.5, 107.94, 101.4.

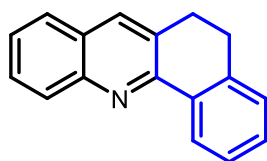

*5,6-dihydrobenzo[c]acridine (18a)*<sup>6</sup> 85% (196 mg) yielded as white solid. <sup>1</sup>H NMR (400 MHz, CDCl<sub>3</sub>): δ 8.64 (d, *J* = 7.7 Hz, 1H), 8.18 (d, *J* = 8.4 Hz, 1H), 7.88 (s, 1H), 7.80 – 7.59 (m, 2H), 7.53 – 7.36 (m, 3H), 7.29 (d, *J* = 7.4 Hz, 1H), 3.17 – 2.96 (m, 4H). <sup>13</sup>C{<sup>1</sup>H} NMR (101 MHz, CDCl<sub>3</sub>): δ 153.4, 147.7, 139.5, 134.8, 133.7, 130.6, 129.7, 129.5, 128.7, 128.0, 128.0, 127.4, 127.0, 126.1, 126.1, 28.9, 28.4.

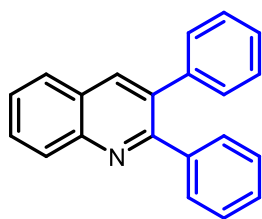

*2,3-diphenylquinoline (19a)*<sup>9</sup> 87% (244 mg) yielded as white solid.

<sup>1</sup>H NMR (400 MHz, CDCl<sub>3</sub>): δ 8.26 – 8.20 (m, 2H), 7.90 (d, *J* = 10.0 Hz, 1H), 7.80 – 7.75 (m, 1H), 7.60 (t, *J* = 6.9 Hz, 1H), 7.51 – 7.46 (m, 2H), 7.35 – 7.27 (m, 8H). <sup>13</sup>C{<sup>1</sup>H} NMR (101 MHz, CDCl<sub>3</sub>): δ

158.5, 147.3, 140.4, 140.0, 137.6, 134.6, 130.1, 129.8, 129.7, 129.5, 128.3, 128.1, 128.0, 127.5, 127.3, 127.2, 126.8.

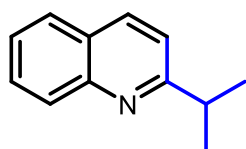

*2-isopropylquinoline (20a)*<sup>10</sup> 89% (152 mg) yielded as white solid. <sup>1</sup>H

NMR (400 MHz, CDCl<sub>3</sub>): δ 8.11 – 8.03 (m, 2H), 7.77 (d, *J* = 6.3 Hz, 1H), 7.70 – 7.65 (m, 1H), 7.47 (t, *J* = 8.1 Hz, 1H), 7.34 (d, *J* = 8.4 Hz,

1H), 3.28 (dq, *J* = 13.9, 7.0 Hz, 1H), 1.40 (d, *J* = 6.8 Hz, 6H). <sup>13</sup>C{<sup>1</sup>H} (101 MHz, CDCl<sub>3</sub>): δ 167.7, 147.7, 136.4, 129.3, 129.0, 127.5, 127.0, 125.7, 119.2, 37.3, 22.6.

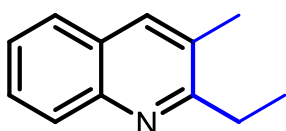

*2-ethyl-3-methylquinoline (21a)* 93% (159 mg) yielded as white solid. <sup>1</sup>H

NMR (400 MHz, CDCl<sub>3</sub>): δ 8.02 (d, *J* = 9.3 Hz, 1H), 7.81 (s, 1H), 7.68 (d, *J* = 9.7 Hz, 1H), 7.60 (t, *J* = 6.9 Hz, 1H), 7.47 – 7.40 (m, 1H), 2.99 (q,

*J* = 7.5 Hz, 2H), 2.47 (s, 3H), 1.37 (t, *J* = 7.5 Hz, 3H). <sup>13</sup>C{<sup>1</sup>H} (101 MHz, CDCl<sub>3</sub>): δ 163.3, 146.7, 135.8, 129.4, 128.5, 128.3, 127.3, 126.7, 125.61, 29.5, 19.13, 12.9.

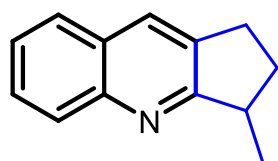

*3-methyl-2,3-dihydro-1H-cyclopenta[b]quinoline (22a)* 88% (156

mg) yielded as colourless oily liquid. <sup>1</sup>H NMR (400 MHz, CDCl<sub>3</sub>):

δ 8.08 (d, *J* = 8.4 Hz, 1H), 7.89 (s, 1H), 7.75 (d, *J* = 9.8 Hz, 1H),

7.67 – 7.61 (m, 1H), 7.50 – 7.44 (m, 1H), 3.35 (h, *J* = 7.0 Hz, 1H), 3.15 – 3.05 (m, 1H), 3.05 – 2.95 (m, 1H), 2.52 – 2.40 (m, 1H), 1.79 (dq, *J* = 12.5, 8.2 Hz, 1H), 1.48 (d, *J* = 7.0 Hz, 3H).

$^{13}\text{C}\{^1\text{H}\}$  NMR (101 MHz,  $\text{CDCl}_3$ ):  $\delta$  171.00, 147.7, 135.4, 130.4, 128.8, 128.2, 127.5, 127.4, 125.5, 40.4, 32.9, 28.7, 18.6.

### General procedure of transfer hydrogenation of ketones.

In a catalytic tube, Ketone (1 mmol), complex **3** (0.5mol %), and KOH (1 equiv) in isopropanol (2 mL) were taken. The reaction mixture was degassed and purged with nitrogen gas for a few minutes to create a  $\text{N}_2$  atmosphere. The reaction mixture was then heated at 80 °C in a preheated oil bath for 6 h followed by cooling to room temperature. Then the reaction mixture was diluted with water (2 mL) and extracted with ethyl acetate ( $3 \times 4$  mL). The resultant organic layer was dried over anhydrous  $\text{Na}_2\text{SO}_4$ , and the solvent was evaporated under reduced pressure. Final products were purified by silica gel column chromatography (60-120 mesh size) using petroleum ether /ethyl acetate as eluent.

### NMR Spectral data of ketones

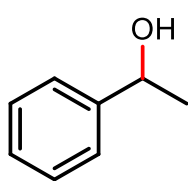

*1-phenylethan-1-ol (2b)*<sup>11</sup> Yield 97% (108.8 mg) yielded as Colourless liquid.  $^1\text{H}$  NMR (400 MHz,  $\text{CDCl}_3$ )  $\delta$  7.38 (dd,  $J = 4.6, 2.4$  Hz, 4H), 7.34 – 7.26 (m, 1H), 4.95 – 4.76 (m, 1H), 1.55 – 1.46 (m, 3H).  $^{13}\text{C}\{^1\text{H}\}$  NMR (101 MHz,  $\text{CDCl}_3$ ):  $\delta$  145.9, 128.5, 127.4, 125.5, 70.3, 25.2.

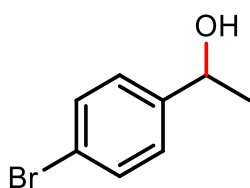

*1-(4-bromophenyl)ethan-1-ol (2b)*<sup>11</sup> 93% (187mg) yielded as Yellowish liquid.  $^1\text{H}$  NMR (400 MHz,  $\text{CDCl}_3$ ):  $\delta$  7.46 (d,  $J = 8.4$  Hz, 2H), 7.23 (d,  $J = 8.4$  Hz, 2H), 4.84 (q,  $J = 6.4$  Hz, 1H), 2.11 (s, 1H), 1.45 (d,  $J = 6.5$  Hz, 3H).  $^{13}\text{C}\{^1\text{H}\}$  NMR (101 MHz,  $\text{CDCl}_3$ ):  $\delta$  144.8, 131.6, 127.2, 121.2, 69.8,

25.3.

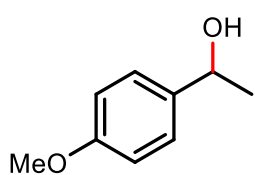

*1-(4-methoxyphenyl)ethan-1-ol (3b)* 83% (126 mg) yielded as Colourless liquid.  $^1\text{H}$  NMR (400 MHz,  $\text{CDCl}_3$ ):  $\delta$  7.27 (d,  $J = 8.3$  Hz, 2H), 7.17 (d,  $J = 7.9$  Hz, 2H), 4.88 (q,  $J = 6.5$  Hz, 1H), 2.35 (s, 3H), 1.77 (s, 1H), 1.49 (d,  $J = 6.4$  Hz, 3H).  $^{13}\text{C}\{^1\text{H}\}$  NMR (101 MHz,  $\text{CDCl}_3$ ):  $\delta$  142.9, 137.2, 129.2, 125.4, 70.3, 25.1, 21.1.

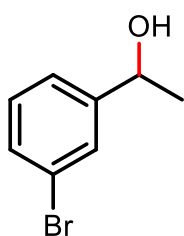

*1-(3-bromophenyl)ethan-1-ol (4b)*<sup>12</sup> 91% (182 mg) yielded as yellowish liquid.  $^1\text{H}$  NMR (400 MHz,  $\text{CDCl}_3$ ):  $\delta$  7.54 (d,  $J = 1.9$  Hz, 1H), 7.40 (d,  $J = 7.9$  Hz, 1H), 7.29 (d,  $J = 7.8$  Hz, 1H), 7.22 (t,  $J = 7.8$  Hz, 1H), 4.88 (q,  $J = 6.4$  Hz, 1H), 1.85 (s, 1H), 1.49 (d,  $J = 6.5$  Hz, 3H).  $^{13}\text{C}\{^1\text{H}\}$  NMR (101 MHz,  $\text{CDCl}_3$ ):  $\delta$  148.1, 130.5, 130.1, 128.6, 124.0, 122.6, 69.8, 25.3.

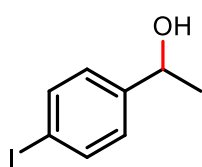

*1-(4-iodophenyl)ethan-1-ol (5b)*<sup>11</sup> 86% (213 mg) yielded a yellowish solid.  $^1\text{H}$  NMR (400 MHz,  $\text{CDCl}_3$ ):  $\delta$  7.67 (d,  $J = 8.3$  Hz, 2H), 7.13 (d,  $J = 8.3$  Hz, 2H), 4.85 (q,  $J = 6.5$  Hz, 1H), 1.86 (s, 1H), 1.47 (d,  $J = 6.5$  Hz, 3H).  $^{13}\text{C}\{^1\text{H}\}$  NMR (101 MHz,  $\text{CDCl}_3$ ):  $\delta$  145.5, 137.6, 127.4, 92.7, 69.9, 25.3.

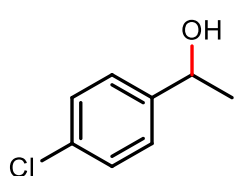

*1-(4-chlorophenyl)ethan-1-ol (6b)*<sup>11</sup> 90% (141 mg) yielded as colourless liquid.  $^1\text{H}$  NMR (400 MHz,  $\text{CDCl}_3$ ):  $\delta$  7.28 (s, 4H), 4.85 (q,  $J = 6.6$  Hz, 1H), 2.00 (s, 1H), 1.44 (d,  $J = 6.6$  Hz, 3H).  $^{13}\text{C}\{^1\text{H}\}$  NMR (101 MHz,  $\text{CDCl}_3$ ):  $\delta$  144.27, 133.1, 128.6, 128.6, 126.8, 69.7, 25.3.

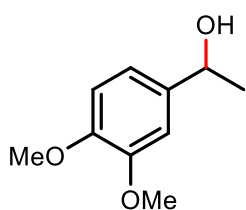

*1-(3,4-dimethoxyphenyl)ethan-1-ol (7b)*<sup>11</sup> 82% (149 mg) yielded as colourless solid. <sup>1</sup>H NMR (400 MHz, CDCl<sub>3</sub>): δ 6.92 (d, *J* = 2.1 Hz, 1H), 6.87 (dd, *J* = 7.9, 2.3 Hz, 1H), 6.81 (d, *J* = 8.2 Hz, 1H), 4.82 (q, *J* = 6.5 Hz, 1H), 3.87 (s, 3H), 3.85 (s, 3H), 2.03 (s, 1H), 1.46 (d, *J* = 6.4 Hz, 3H).

<sup>13</sup>C{<sup>1</sup>H} NMR (101 MHz, CDCl<sub>3</sub>): δ 149.1, 148.3, 138.6, 117.5, 111.0, 108.7, 108.7, 70.2, 55.9, 55.9, 25.1.

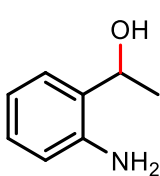

*1-(2-aminophenyl)ethan-1-ol (8b)*<sup>11</sup> 75% (102 mg) yielded as Yellowish liquid. <sup>1</sup>H NMR (400 MHz, CDCl<sub>3</sub>): δ 7.16 – 7.02 (m, 2H), 6.82 – 6.62 (m, 2H), 4.94 (q, *J* = 6.6 Hz, 1H), 1.60 (d, *J* = 6.6 Hz, 3H), 0.88 (s, 1H). <sup>13</sup>C{<sup>1</sup>H} NMR (101 MHz,

CDCl<sub>3</sub>): δ 145.2, 128.6, 128.3, 126.5, 118.1, 116.6, 69.7, 21.5.

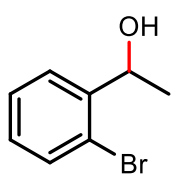

*1-(2-bromophenyl)ethan-1-ol (9b)* 90% (181 mg) yielded a White solid. <sup>1</sup>H NMR (400 MHz, CDCl<sub>3</sub>): δ 7.50 (s, 1H), 7.37 (d, *J* = 7.8 Hz, 1H), 7.25 (d, *J* = 7.7 Hz, 1H), 7.18 (t, *J* = 7.8 Hz, 1H), 4.82 (q, *J* = 6.4 Hz, 1H), 1.44 (d, *J* = 6.4

Hz, 3H) <sup>13</sup>C{<sup>1</sup>H} NMR (101 MHz, CDCl<sub>3</sub>): δ 148.2, 130.6, 130.2, 128.7, 124.1, 122.7, 69.8, 25.3.

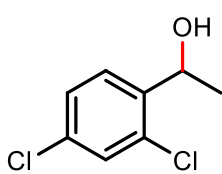

*1-(2,4-dichlorophenyl)ethan-1-ol (10b)*<sup>12</sup> 87% (166 mg) yielded a Colourless liquid. <sup>1</sup>H NMR (400 MHz, CDCl<sub>3</sub>): δ 7.54-7.51 (dd, *J* = 8.4, 4.5 Hz, 1H), 7.35 -7.34(d, *J* = 2.2 Hz, 1H), 7.29-7.26 (m, 1H), 5.27 – 5.20 (m,

1H), 1.46 (m, 3H).  $^{13}\text{C}\{^1\text{H}\}$  NMR (101 MHz,  $\text{CDCl}_3$ ):  $\delta$  141.8, 133.5, 132.2, 129.2, 127.6, 127.5, 66.7, 23.7.

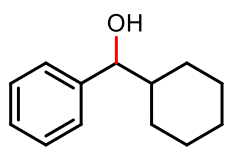

*cyclohexyl(phenyl)methanol (11b)* 83% (158 mg) yielded a Colourless liquid.  $^1\text{H}$  NMR (400 MHz,  $\text{CDCl}_3$ ):  $\delta$  7.33 – 7.20 (m, 5H), 4.31 (d,  $J = 7.3$  Hz, 1H), 1.99 – 1.91 (m, 2H), 1.73 (dd,  $J = 11.9, 4.2$  Hz, 1H), 1.66 – 1.55 (m, 3H), 1.38 – 1.31 (m, 1H), 1.16 – 1.08 (m, 2H), 1.00 (dd,  $J = 12.1, 4.2$  Hz, 1H), 0.94 – 0.84 (m, 1H).  $^{13}\text{C}\{^1\text{H}\}$  NMR (101 MHz,  $\text{CDCl}_3$ ):  $\delta$  143.7, 128.3, 127.5, 126.6, 79.5, 45.1, 29.4, 29.0, 26.5, 26.2, 26.1.

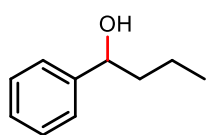

*1-phenylbutan-1-ol (12b)* 81% (122 mg) yielded a Colourless liquid.  $^1\text{H}$  NMR (500 MHz,  $\text{CDCl}_3$ ):  $\delta$  7.31 – 7.15 (m, 5H), 4.58 (d,  $J = 5.5$  Hz, 1H), 1.75 – 1.58 (m, 2H), 1.38 – 1.21 (m, 2H), 0.86 (t,  $J = 7.4$  Hz, 3H).  $^{13}\text{C}\{^1\text{H}\}$  NMR (126 MHz,  $\text{CDCl}_3$ ):  $\delta$  145.0, 128.6, 127.5, 126.0, 74.4, 41.3, 19.1, 14.1.

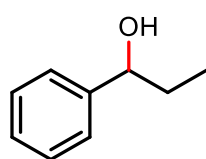

*1-phenylpropan-1-ol (13b)*<sup>13</sup> 80% (109 mg) yielded a Colourless liquid.  $^1\text{H}$  NMR (500 MHz,  $\text{CDCl}_3$ ):  $\delta$  7.42 – 7.26 (m, 5H), 4.61 (t,  $J = 6.6$  Hz, 1H), 1.88 – 1.74 (m, 2H), 0.95 (t,  $J = 7.5$  Hz, 3H).  $^{13}\text{C}\{^1\text{H}\}$  NMR (126 MHz,  $\text{CDCl}_3$ ):  $\delta$  144.7, 128.5, 127.6, 126.1, 76.1, 32.0, 10.3.

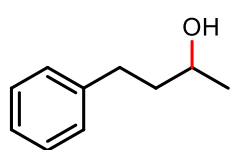

*4-phenylbutan-2-ol (14b)*<sup>4</sup> 78% (117 mg) yielded as Colourless oily liquid.  $^1\text{H}$  NMR (400 MHz,  $\text{CDCl}_3$ ):  $\delta$  7.30 (t,  $J = 7.3$  Hz, 2H), 7.21 (dd,  $J = 7.7, 3.3$  Hz, 3H), 3.84 (h,  $J = 6.1$  Hz, 1H), 2.84 – 2.61 (m, 2H), 1.83 – 1.74 (m, 2H), 1.24

(d,  $J = 6.2$  Hz, 3H).  $^{13}\text{C}$  { $^1\text{H}$ } NMR (101 MHz,  $\text{CDCl}_3$ ):  $\delta$  142.2, 128.5, 125.9, 67.6, 41.0, 32.2, 23.7.

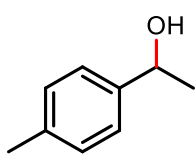

*1-(p-tolyl)ethan-1-ol (15b)*<sup>12</sup> 87% (109 mg) yielded as White solid.  $^1\text{H}$  NMR (400 MHz,  $\text{CDCl}_3$ ):  $\delta$  7.36 (d,  $J = 8.3$  Hz, 2H), 7.25 (d,  $J = 7.9$  Hz, 2H), 4.96 (q,  $J = 6.5$  Hz, 1H), 2.43 (s, 3H), 1.57 (d,  $J = 6.4$  Hz, 3H).  $^{13}\text{C}$  { $^1\text{H}$ } NMR (101 MHz,  $\text{CDCl}_3$ ):  $\delta$  143.0, 137.3, 129.3, 125.5, 70.4, 25.2, 21.2.

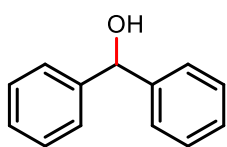

*diphenylmethanol (16b)*<sup>11</sup> 92% (169 mg) yielded as White solid.  $^1\text{H}$  NMR (400 MHz,  $\text{CDCl}_3$ ):  $\delta$  7.39 (dt,  $J = 15.0, 7.5$  Hz, 8H), 7.30 (t,  $J = 7.1$  Hz, 2H), 5.87 (s, 1H).  $^{13}\text{C}$  { $^1\text{H}$ } NMR (126 MHz,  $\text{CDCl}_3$ ):  $\delta$  143.8, 128.5, 127.6, 126.6, 76.3.

### General procedure of transfer hydrogenation of ketones.

In a catalytic tube, Aldehyde (1 mmol), complex **3** (0.5mol %), and KOH (1 equiv) in isopropanol (2 mL) were taken. The reaction mixture was degassed and purged with nitrogen gas for a few minutes to create a  $\text{N}_2$  atmosphere. The reaction mixture was then heated at 80 °C in a preheated oil bath for 6 h followed by cooling to room temperature. Then the reaction mixture was diluted with water (2 mL) and extracted with ethyl acetate ( $3 \times 4$  mL). The resultant organic layer was dried over anhydrous  $\text{Na}_2\text{SO}_4$ , and the solvent was evaporated under reduced pressure. Final products were purified by silica gel column chromatography (60-120 mesh size) using petroleum ether /ethyl acetate as eluent.

### NMR spectral data of catalytic products of transfer hydrogenation of aldehyde



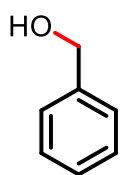

*phenylmethanol (1c)*<sup>13</sup> 94% (101 mg) yielded as colourless liquid. <sup>1</sup>H NMR (500 MHz, CDCl<sub>3</sub>): δ 7.36 (d, *J* = 4.6 Hz, 4H), 7.30 (dq, *J* = 9.0, 4.5 Hz, 1H), 4.69 (s, 2H). <sup>13</sup>C{<sup>1</sup>H} (126 MHz, CDCl<sub>3</sub>): δ 141.0, 128.6, 127.6, 127.0, 65.3, 65.3.

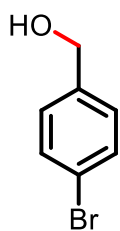

*(4-bromophenyl)methanol (2c)*<sup>13</sup> 91% (170 mg) yielded as white solid. <sup>1</sup>H NMR (500 MHz, CDCl<sub>3</sub>): δ 7.50 (d, *J* = 8.0 Hz, 2H), 7.26 (d, *J* = 8.1 Hz, 2H), 4.67 (s, 2H). <sup>13</sup>C{<sup>1</sup>H} NMR (126 MHz, CDCl<sub>3</sub>): δ 139.8, 131.6, 128.6, 121.5, 64.6.

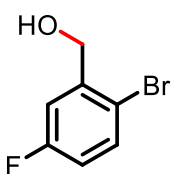

*(2-bromo-5-fluorophenyl)methanol (3c)* 87% (178 mg) yielded as yellow solid. <sup>1</sup>H NMR (400 MHz, CDCl<sub>3</sub>): δ 7.48 (dd, *J* = 8.7, 5.1 Hz, 1H), 7.31 – 7.23 (m, 1H), 6.88 (td, *J* = 8.3, 2.9 Hz, 1H), 4.72 (s, 2H). <sup>13</sup>C{<sup>1</sup>H} NMR (101 MHz, CDCl<sub>3</sub>): δ 163.6, 161.1, 142.1, 133.7, 133.6, 116.0, 115.6, 64.5.

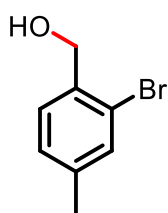

*(2-bromo-4-methylphenyl)methanol (4c)* 81% (163 mg) yielded as white solid. <sup>1</sup>H NMR (400 MHz, CDCl<sub>3</sub>): δ 7.40 (s, 1H), 7.36 (d, *J* = 7.8 Hz, 1H), 7.15 (d, *J* = 5.7 Hz, 1H), 4.72 (s, 2H), 2.35 (s, 3H). <sup>13</sup>C{<sup>1</sup>H} NMR (101 MHz, CDCl<sub>3</sub>): δ 139.4, 136.7, 133.1, 129.0, 128.4, 122.6, 65.0, 20.8.

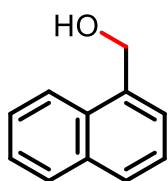

*naphthalen-1-ylmethanol (5c)* 85% (134 mg) yielded as yellow solid. <sup>1</sup>H NMR (400 MHz, CDCl<sub>3</sub>): δ 8.15 (d, *J* = 9.1 Hz, 1H), 7.94 – 7.82 (m, 2H), 7.62 – 7.52 (m, 3H), 7.51 – 7.45 (m, 1H), 5.17 (s, 2H). <sup>13</sup>C{<sup>1</sup>H} NMR (101 MHz, CDCl<sub>3</sub>): δ 136.39, 133., 131.4, 128.7, 128.6, 126.4, 125.9, 125.4, 125.4, 123.7, 63.7.

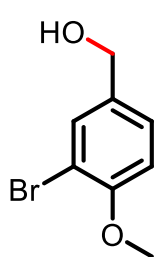

(3-bromo-4-methoxyphenyl)methanol (**6c**) 87% (189 mg) yielded as white solid.  $^1\text{H}$  NMR (500 MHz,  $\text{CDCl}_3$ ):  $\delta$  7.58 (d,  $J = 12.4$  Hz, 1H), 7.27 (d,  $J = 8.5$  Hz, 1H), 6.89 (d,  $J = 8.4$  Hz, 1H), 4.64 (s, 2H), 3.91 (s, 3H).  $^{13}\text{C}\{^1\text{H}\}$  NMR (126 MHz,  $\text{CDCl}_3$ ):  $\delta$  155.3, 134.6, 132.2, 127.4, 111.9, 111.6, 64.2, 56.3.

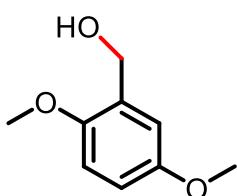

(2,5-dimethoxyphenyl)methanol (**7c**) 88% (148 mg) yielded as yellowish liquid.  $^1\text{H}$  NMR (400 MHz,  $\text{CDCl}_3$ ):  $\delta$  6.88 (d,  $J = 2.6$  Hz, 1H), 6.80 – 6.76 (m, 2H), 4.65 (s, 2H), 3.81 (s, 3H), 3.76 (s, 3H).  $^{13}\text{C}\{^1\text{H}\}$  NMR (101 MHz,  $\text{CDCl}_3$ ):  $\delta$  153.6, 151.5, 130.1, 114.8, 113.0, 111.1, 62.0, 55.8.

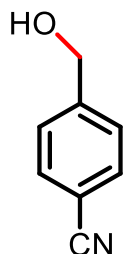

4-(hydroxymethyl)benzonitrile (**8c**) 78% (104 mg) yielded as colourless liquid.  $^1\text{H}$  NMR (400 MHz,  $\text{CDCl}_3$ ):  $\delta$  7.62 (d,  $J = 8.3$  Hz, 2H), 7.46 (d,  $J = 8.0$  Hz, 2H), 4.75 (s, 2H).  $^{13}\text{C}\{^1\text{H}\}$  NMR (101 MHz,  $\text{CDCl}_3$ ):  $\delta$  146.5, 132.3, 127.0, 118.9, 111.0, 64.1.

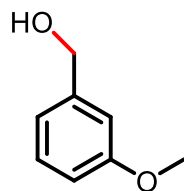

(3-methoxyphenyl)methanol (**9c**)<sup>13</sup> 79% (109 mg) yielded as colourless liquid.  $^1\text{H}$  NMR (400 MHz,  $\text{CDCl}_3$ ):  $\delta$  7.26 (t,  $J = 8.1$  Hz, 1H), 6.92 (d,  $J = 5.6$  Hz, 2H), 6.82 (d,  $J = 8.7$  Hz, 1H), 4.65 (s, 2H), 3.80 (s, 3H).  $^{13}\text{C}\{^1\text{H}\}$  NMR (101 MHz,  $\text{CDCl}_3$ ):  $\delta$  159.8, 142.6, 129.6, 119.1, 113.4, 112.26, 65.2, 55.2.

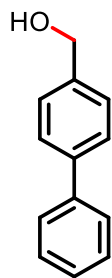

[1,1'-biphenyl]-4-ylmethanol (**10c**) 84% (154 mg) yielded as colourless solid.

$^1\text{H}$  NMR (400 MHz,  $\text{CDCl}_3$ ):  $\delta$  7.65 – 7.60 (m, 4H), 7.50 – 7.44 (m, 4H), 7.41 – 7.35 (m, 1H), 4.77 (s, 2H).  $^{13}\text{C}\{^1\text{H}\}$  NMR (101 MHz,  $\text{CDCl}_3$ ):  $\delta$  140.8, 140.7, 139.9, 128.8, 127.5, 127.4, 127.1, 65.2.

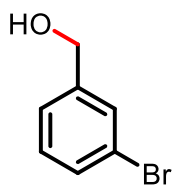

3-bromophenylmethanol (**11c**) 93% (187 mg) yielded as colourless liquid.

$^1\text{H}$  NMR (500 MHz,  $\text{CDCl}_3$ ):  $\delta$  7.54 (s, 1H), 7.44 (d,  $J = 1.8$  Hz, 1H), 7.29 (d,  $J = 7.8$  Hz, 1H), 7.24 (d,  $J = 7.8$  Hz, 1H), 4.63 (s, 2H).  $^{13}\text{C}\{^1\text{H}\}$  NMR

(126 MHz,  $\text{CDCl}_3$ ):  $\delta$  143.1, 130.6, 130.1, 129.9, 125.4, 122.6, 64.4.

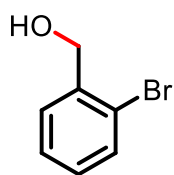

2-bromophenylmethanol (**12c**) 89% (166 mg) yielded as white solid.  $^1\text{H}$

NMR (500 MHz,  $\text{CDCl}_3$ ):  $\delta$  7.56 (d,  $J = 8.0$  Hz, 1H), 7.50 (d,  $J = 9.3$  Hz, 1H), 7.34 (t,  $J = 7.4$  Hz, 1H), 7.17 (t,  $J = 8.6$  Hz, 1H), 4.72 (s, 2H)  $^{13}\text{C}\{^1\text{H}\}$

NMR (126 MHz,  $\text{CDCl}_3$ ):  $\delta$  139.8, 132.6, 129.1, 128.8, 127.7, 122.5, 64.9.

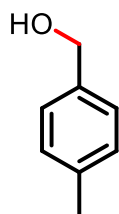

*p*-tolylmethanol (**13c**)<sup>13</sup> 84% (102 mg) yielded as white solid.  $^1\text{H}$  NMR (400

MHz,  $\text{CDCl}_3$ ):  $\delta$  7.26 (d,  $J = 8.0$  Hz, 2H), 7.17 (d,  $J = 7.8$  Hz, 2H), 4.65 (s, 2H), 2.35 (s, 3H).  $^{13}\text{C}\{^1\text{H}\}$  NMR (101 MHz,  $\text{CDCl}_3$ ):  $\delta$  137.9, 137.4, 129.3, 127.13, 65.3, 21.2.

## NMR spectra of catalytic products

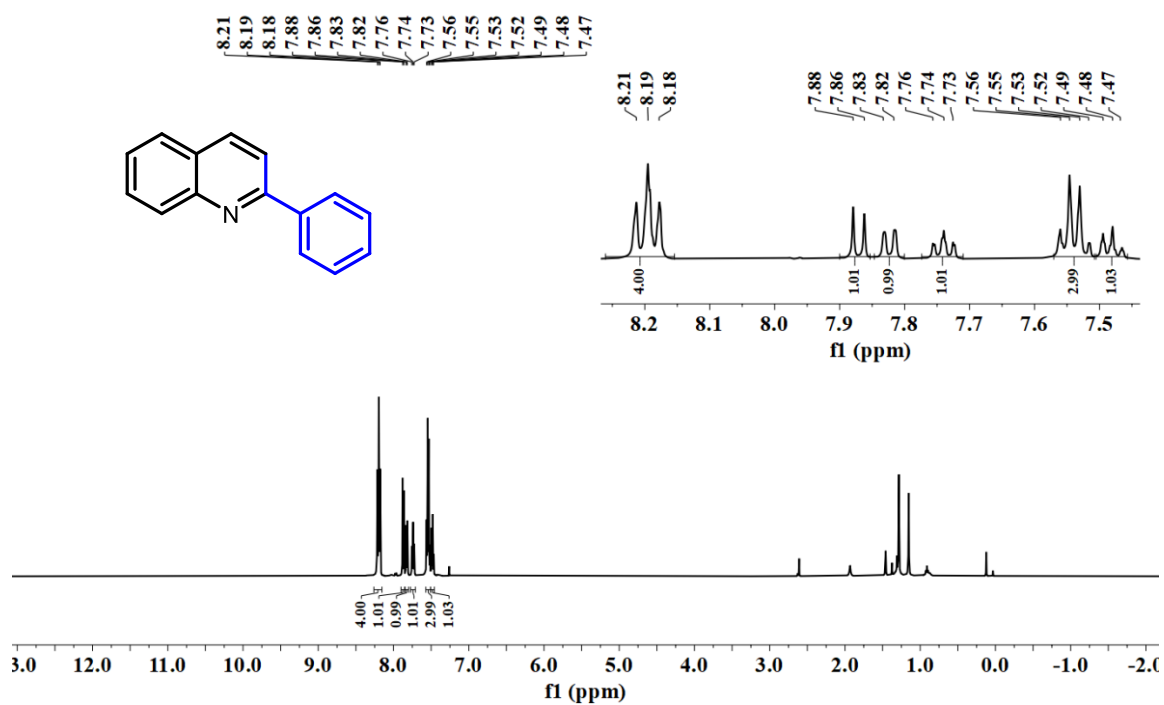

**Fig. S29.**  $^1\text{H}$  NMR spectrum of **1a** in  $\text{CDCl}_3$  (500 MHz).

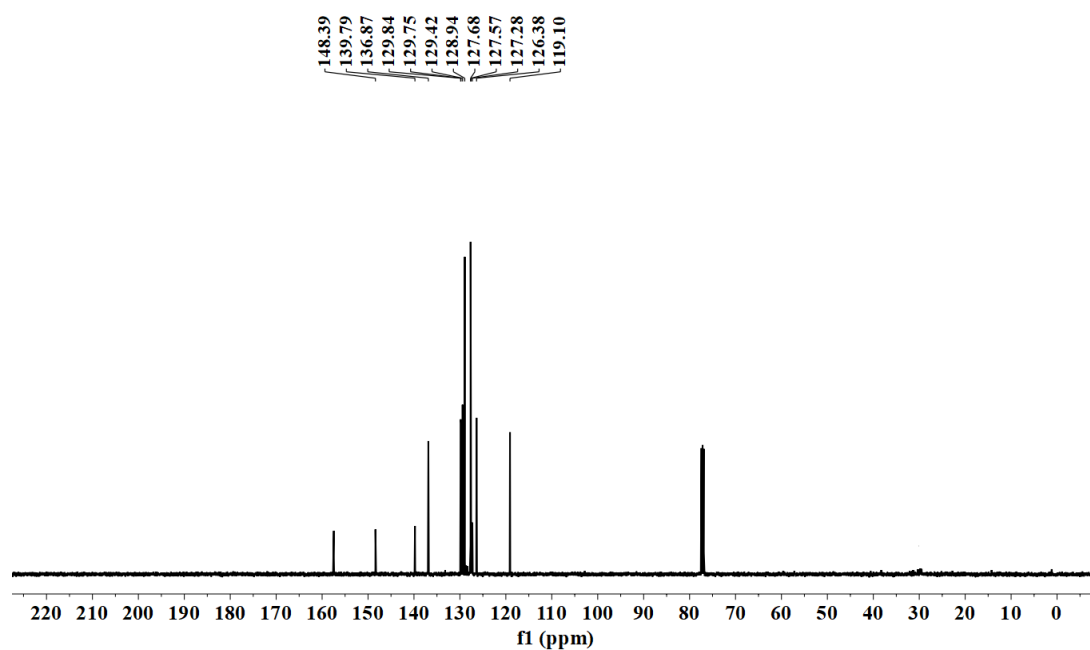

**Fig. S30.**  $^{13}\text{C}\{^1\text{H}\}$  NMR spectrum of **1a** in  $\text{CDCl}_3$  (126 MHz).

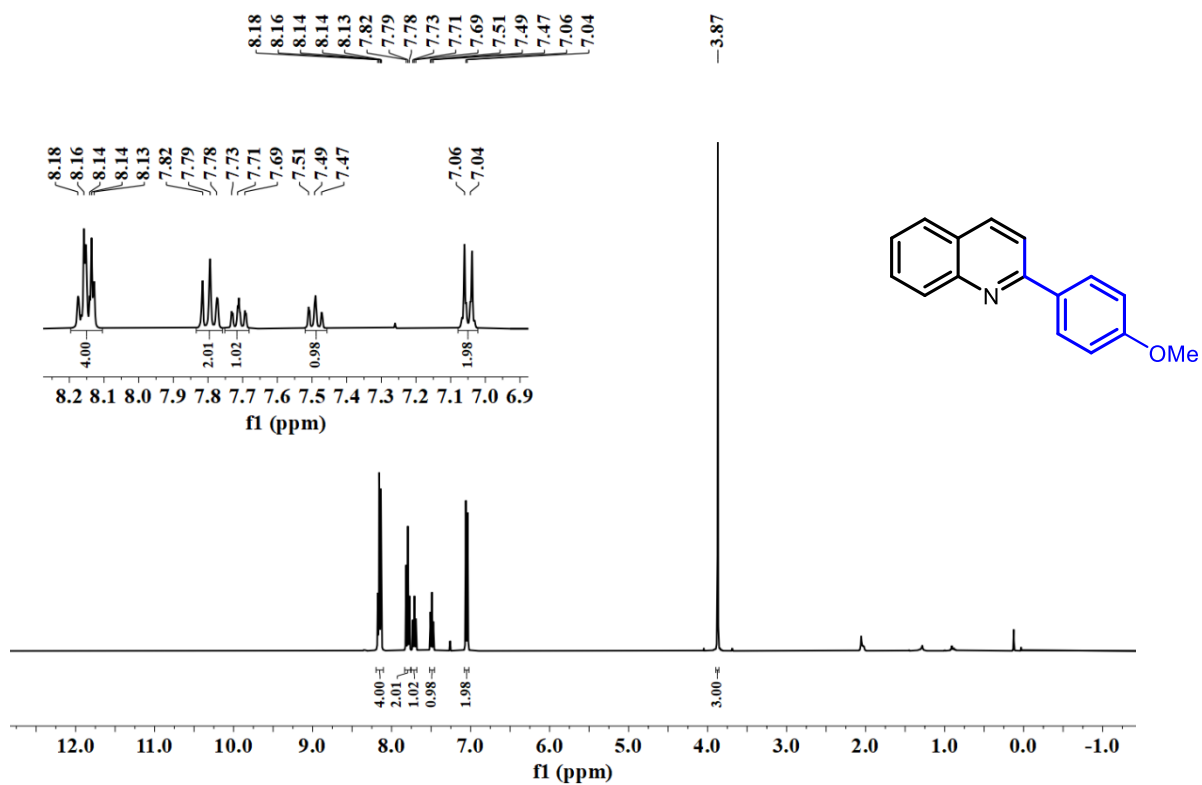

Fig. S31. <sup>1</sup>H NMR spectrum of **2a** in CDCl<sub>3</sub> (400 MHz).

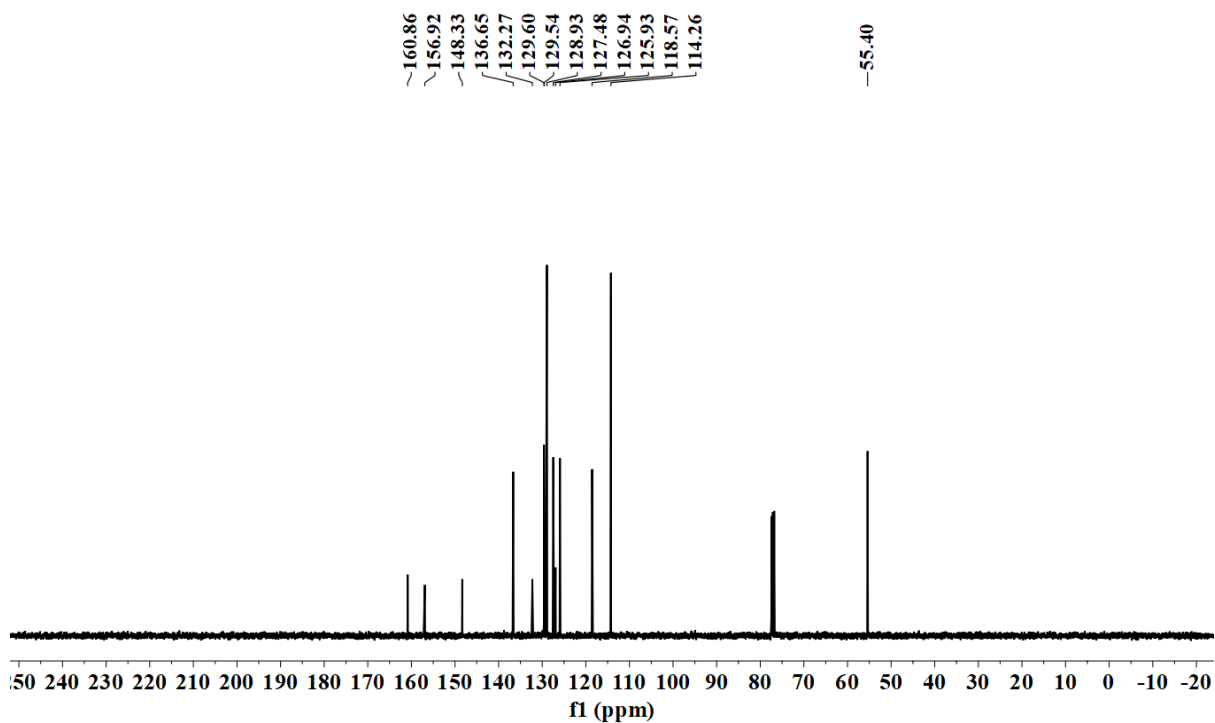

Fig. S32. <sup>13</sup>C{<sup>1</sup>H} NMR spectrum of **2a** in CDCl<sub>3</sub> (101 MHz).

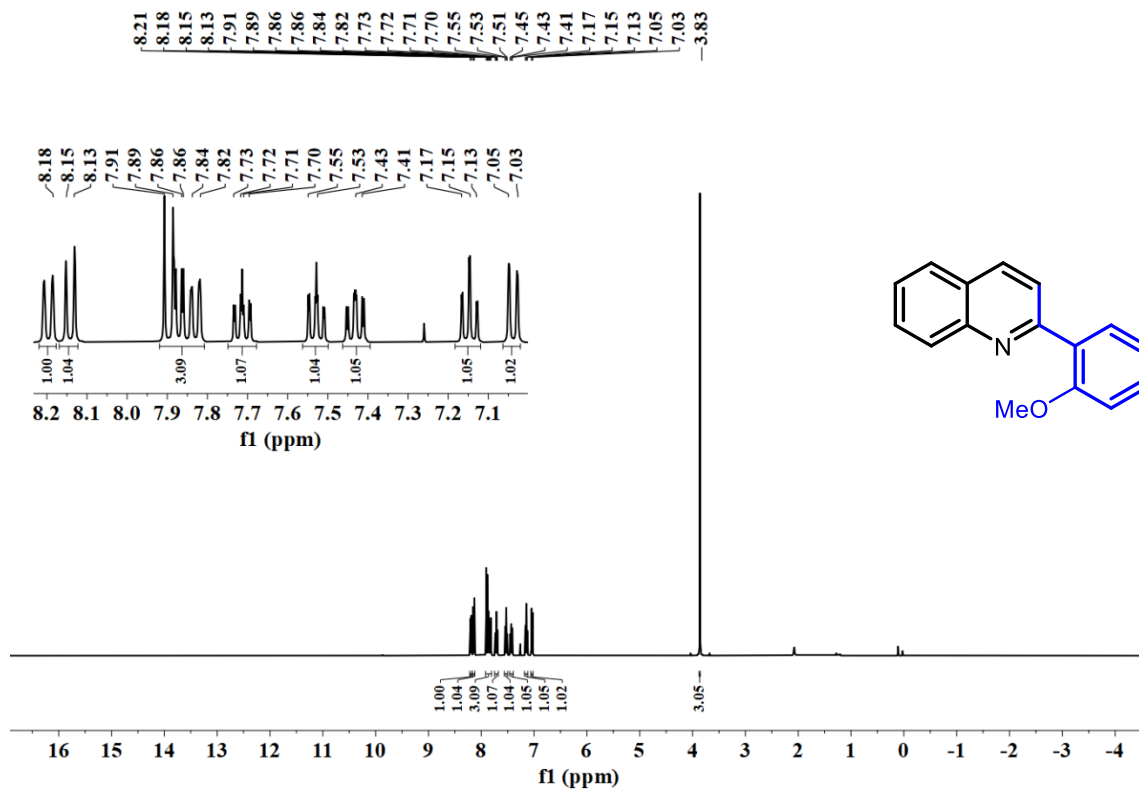

Fig. S33.  $^1\text{H}$  NMR spectrum of 3a in  $\text{CDCl}_3$  (400 MHz).

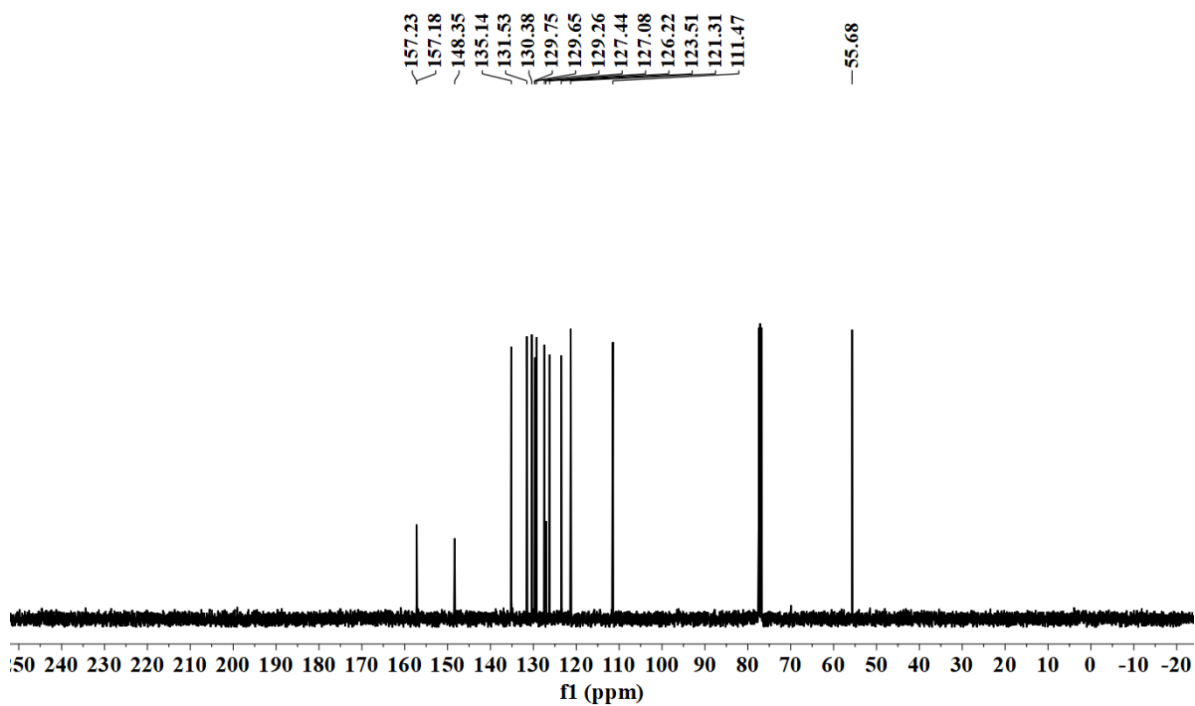

Fig. S34.  $^{13}\text{C}\{^1\text{H}\}$  NMR spectrum of 3a in  $\text{CDCl}_3$  (101 MHz).

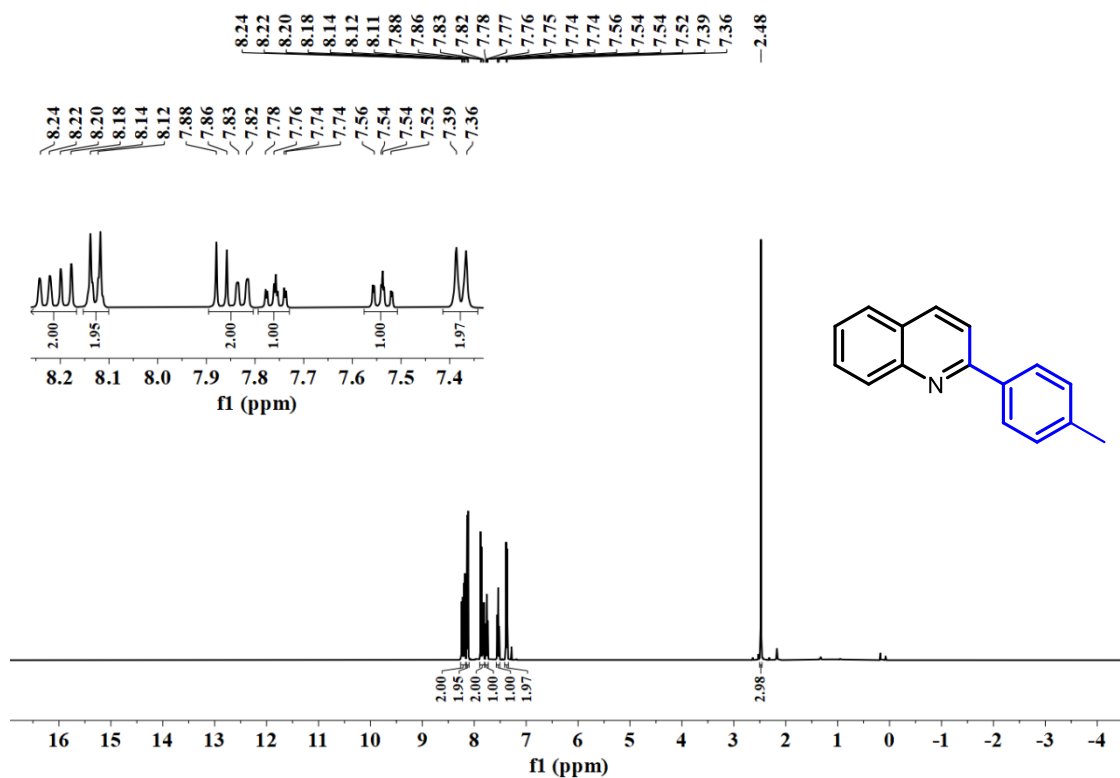

Fig. S35.  $^1\text{H}$  NMR spectrum of **4a** in  $\text{CDCl}_3$  (400 MHz).

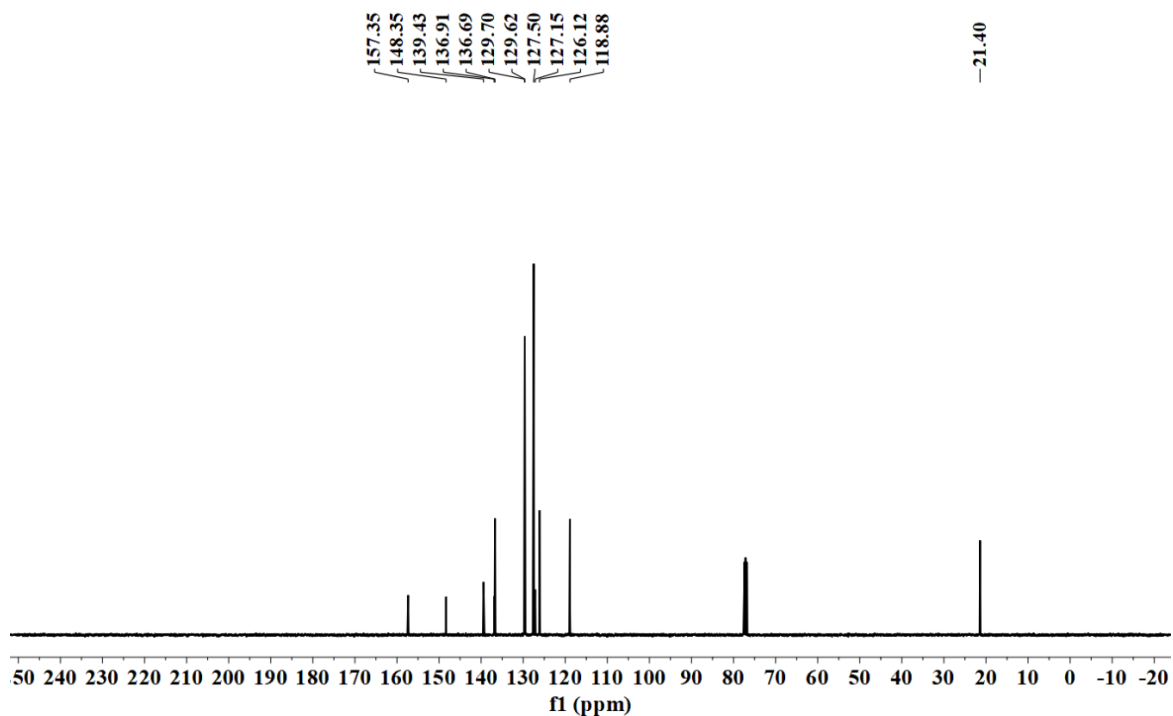

Fig. S36.  $^{13}\text{C}\{^1\text{H}\}$  NMR spectrum of **4a** in  $\text{CDCl}_3$  (101 MHz).

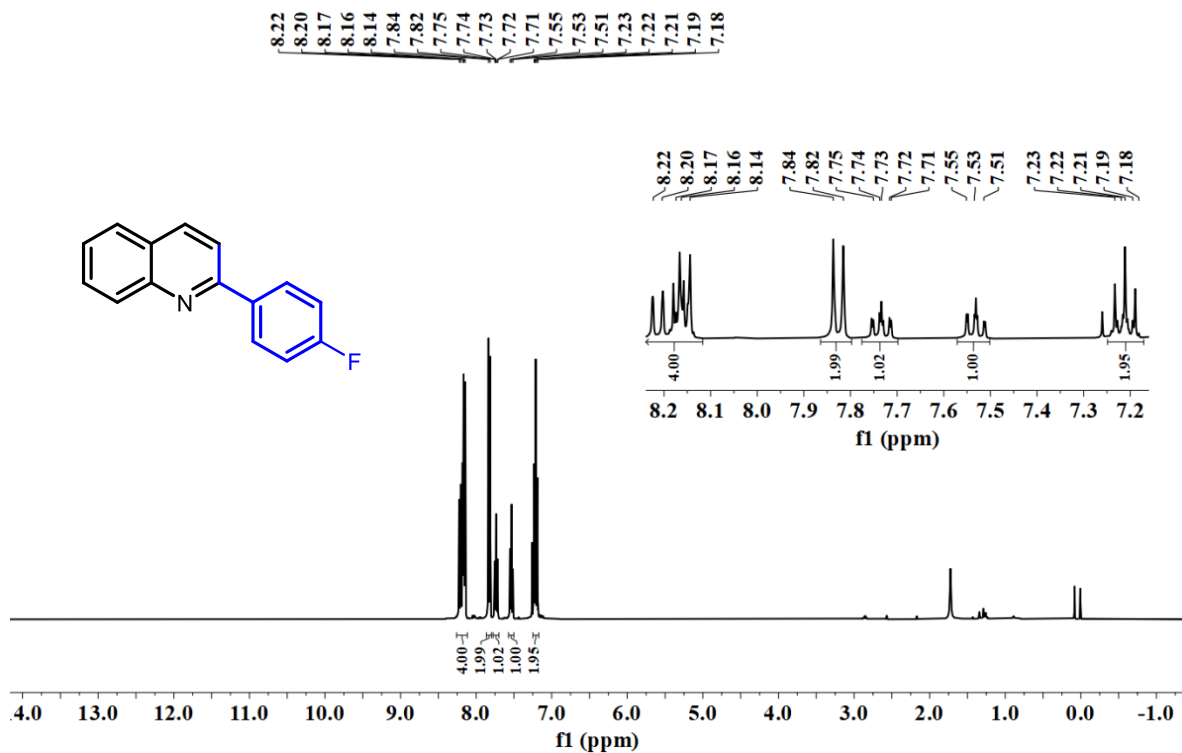

**Fig. S37.** <sup>1</sup>H NMR spectrum of **5a** in CDCl<sub>3</sub> (400 MHz).

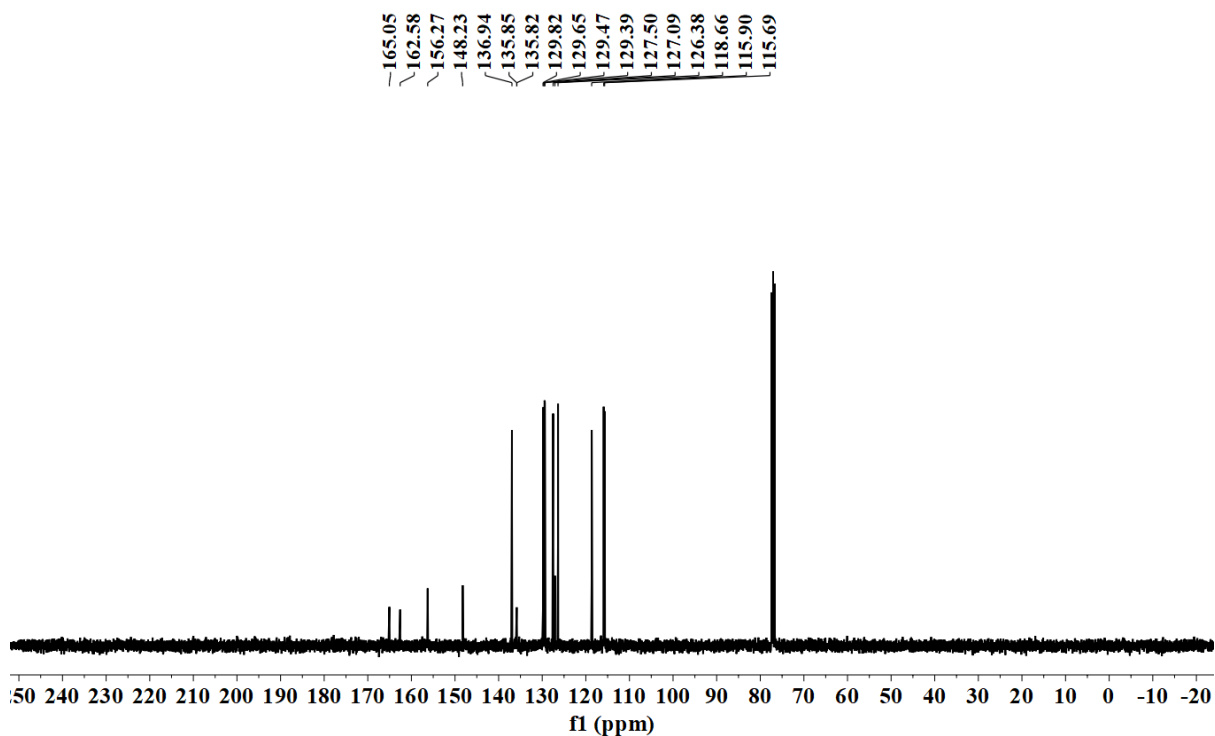

**Fig. S38.** <sup>13</sup>C{<sup>1</sup>H} NMR spectrum of **5a** in CDCl<sub>3</sub> (101 MHz).



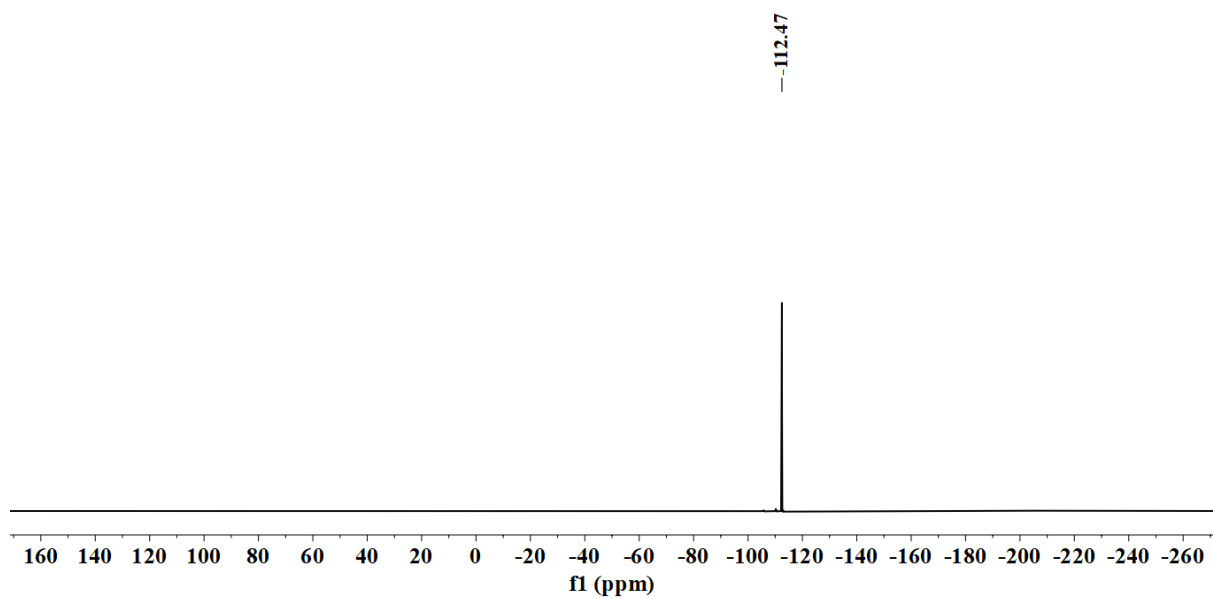

Fig. S39.  $^{19}\text{F}\{^1\text{H}\}$  NMR spectrum of **5a** in  $\text{CDCl}_3$  (376 MHz).

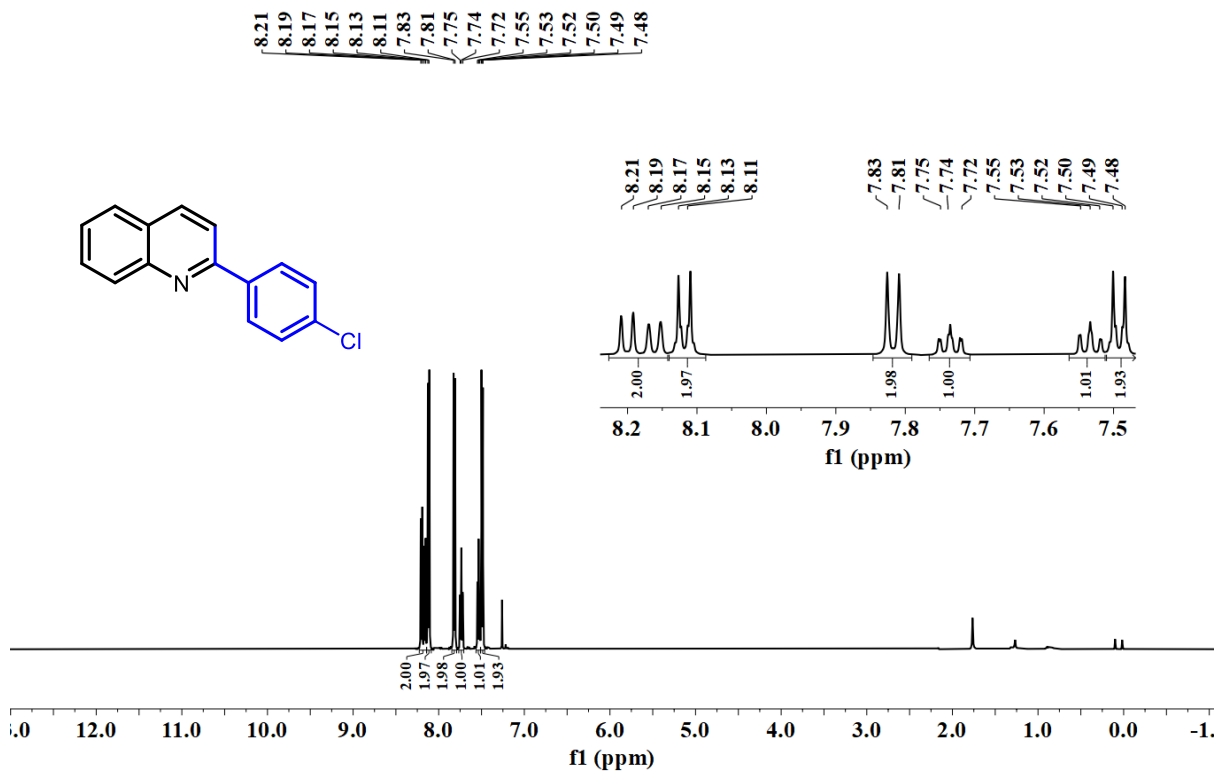

Fig.. S40.  $^1\text{H}$  NMR spectrum of **6a** in  $\text{CDCl}_3$  (400 MHz).

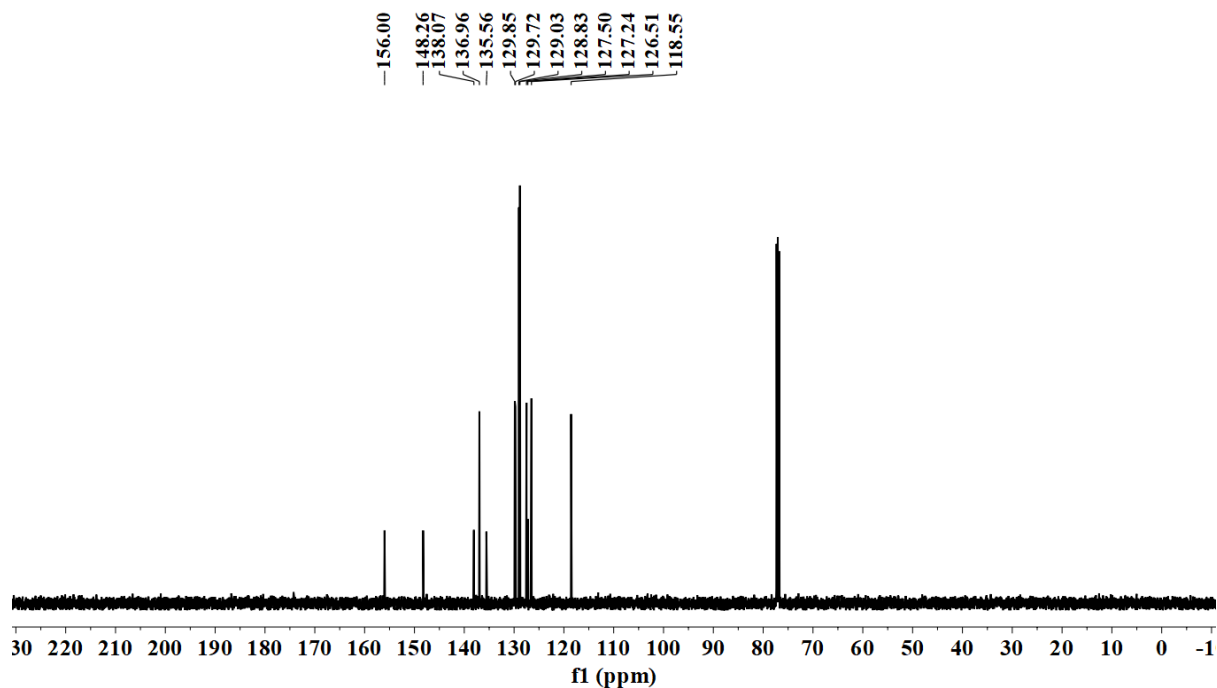

Fig. S41.  $^{13}\text{C}\{^1\text{H}\}$  NMR spectrum of **6a** in  $\text{CDCl}_3$  (101 MHz).

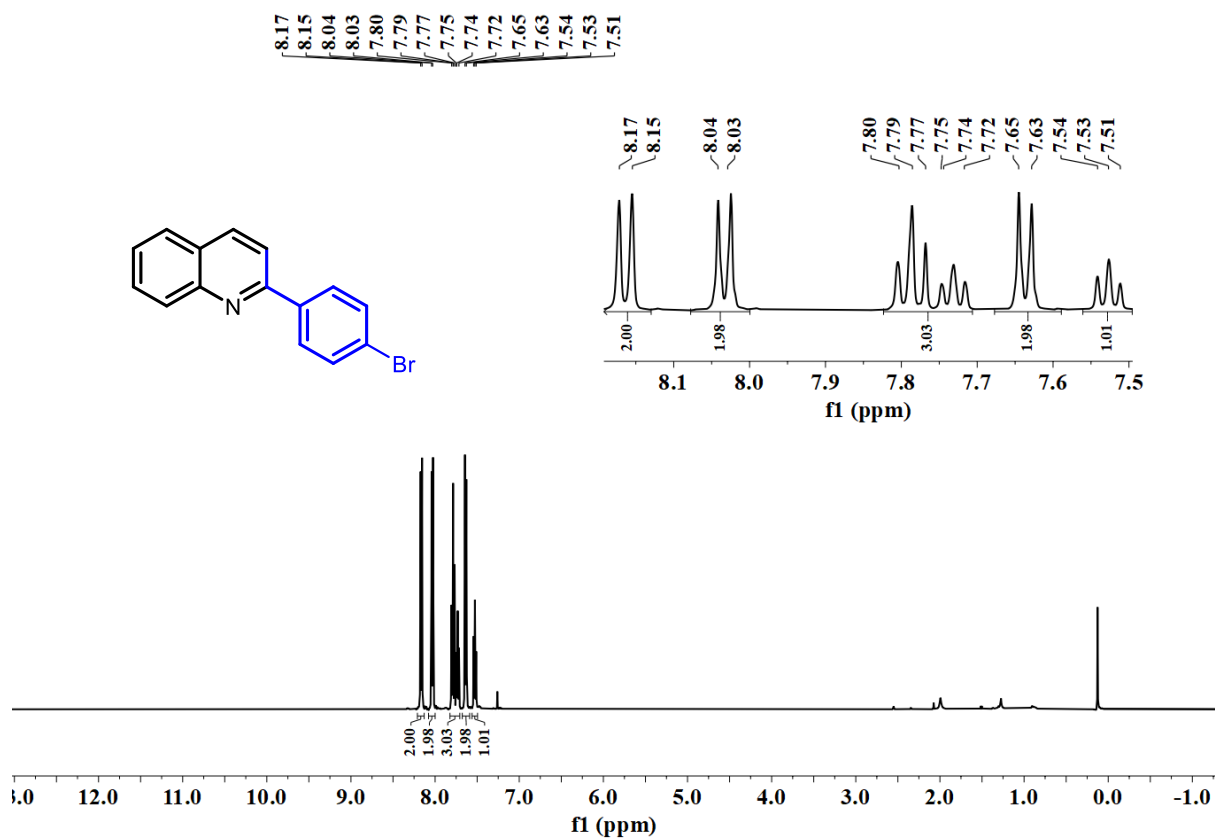

Fig. S42.  $^1\text{H}$  NMR spectrum of **7a** in  $\text{CDCl}_3$  (500 MHz).

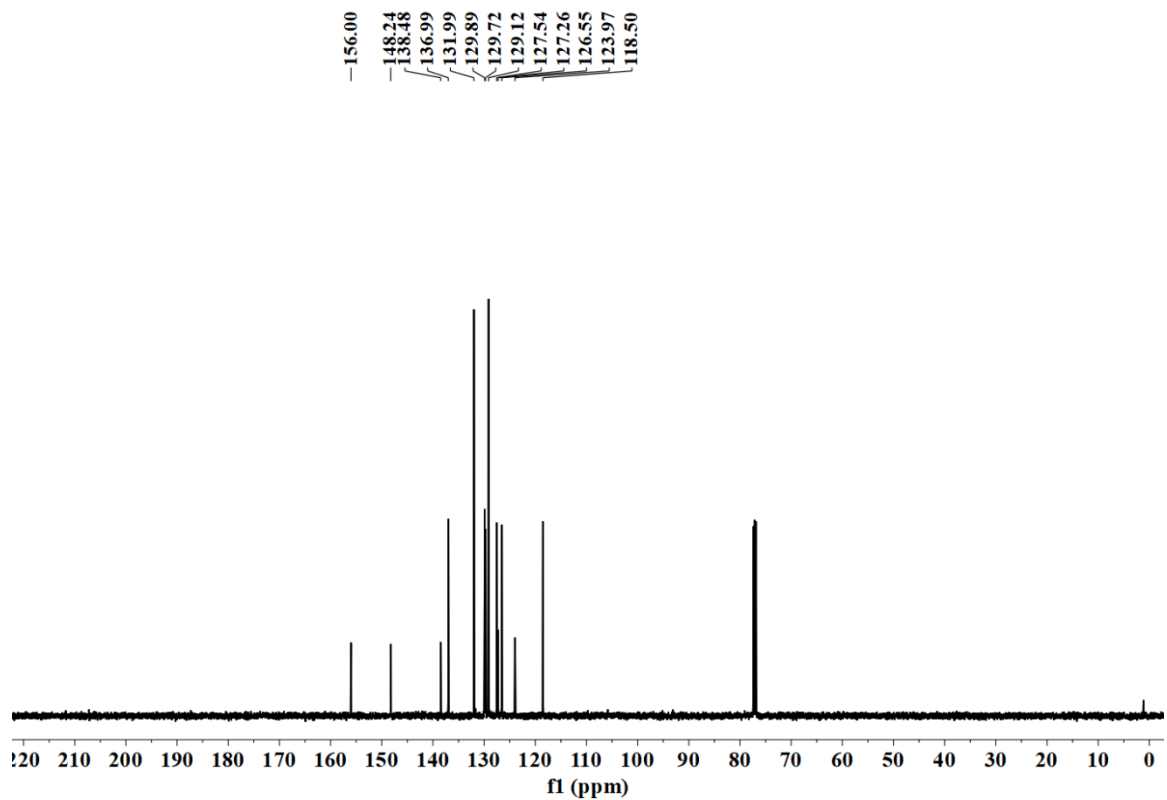

Fig. S43.  $^{13}\text{C}\{^1\text{H}\}$  NMR spectrum of **7a** in  $\text{CDCl}_3$  (126 MHz).

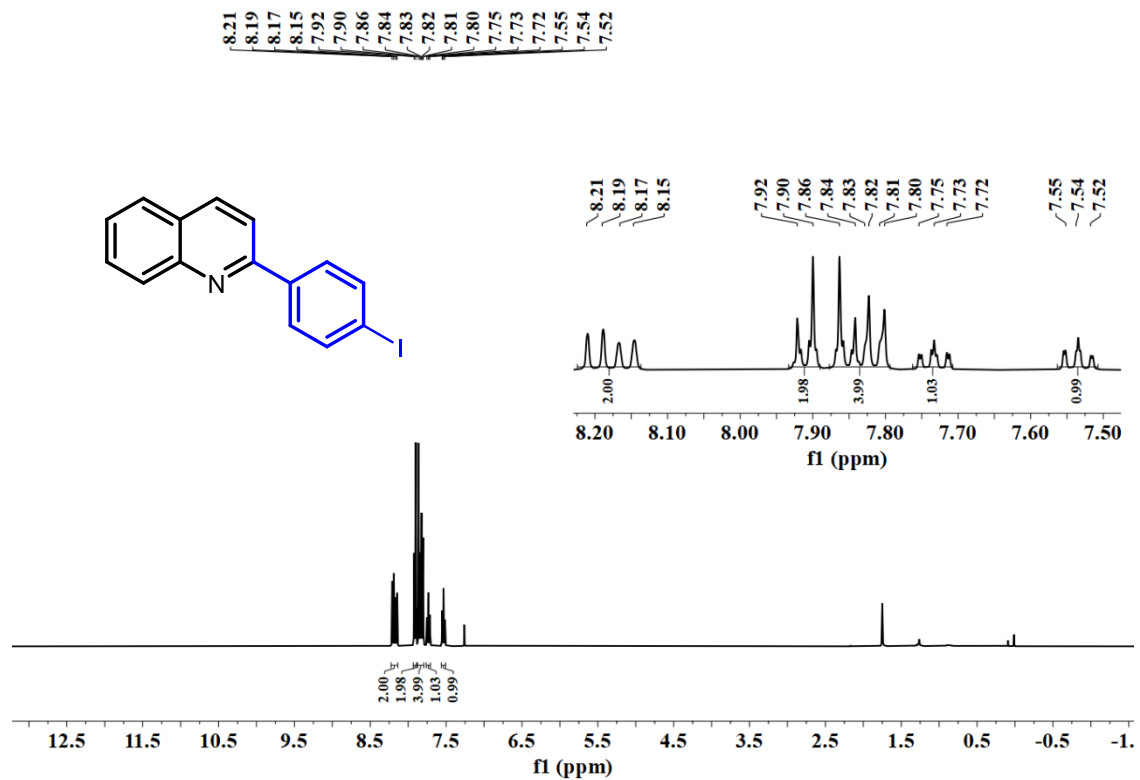

Fig. S44.  $^1\text{H}$  NMR spectrum of **8a** in  $\text{CDCl}_3$  (400 MHz).

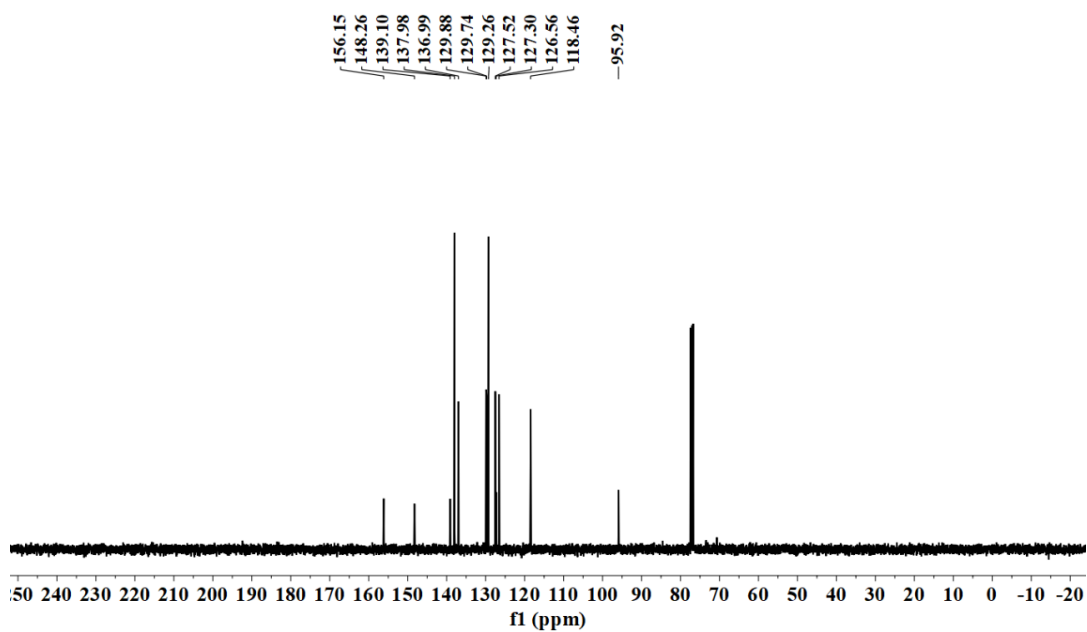

Fig. S45.  $^{13}\text{C}\{^1\text{H}\}$  NMR spectrum of **8a** in  $\text{CDCl}_3$  (101 MHz).

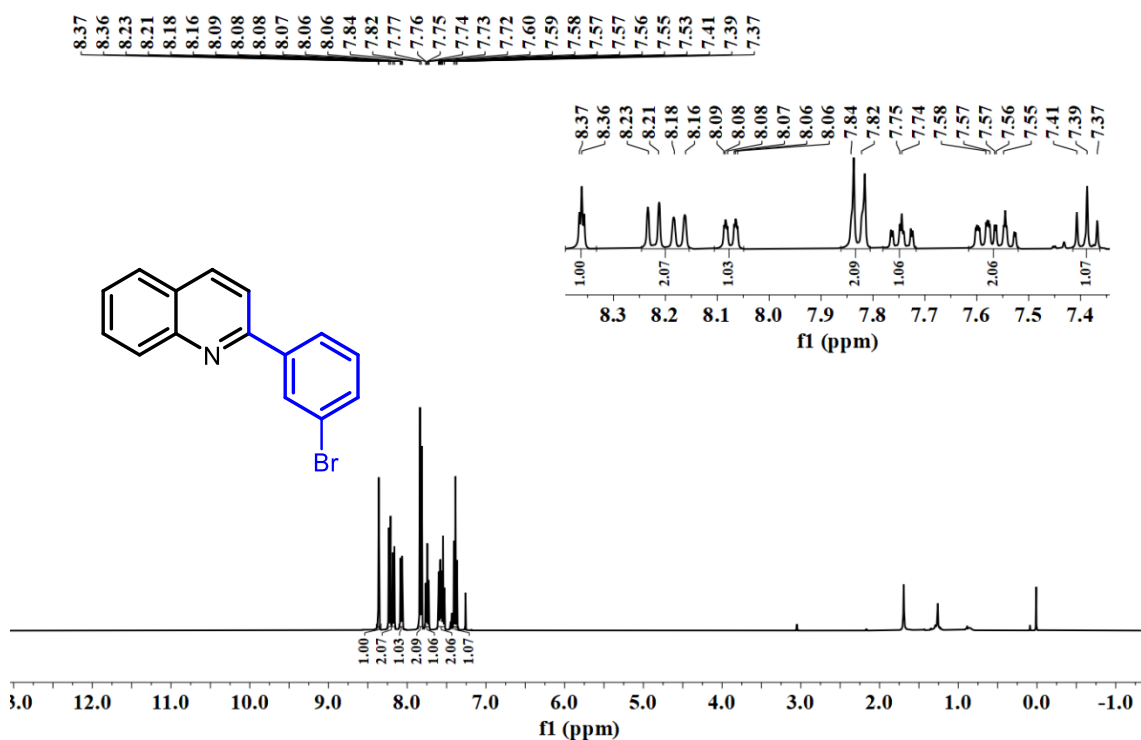

Fig. S46.  $^1\text{H}$  NMR spectrum of **9a** in  $\text{CDCl}_3$  (400 MHz).

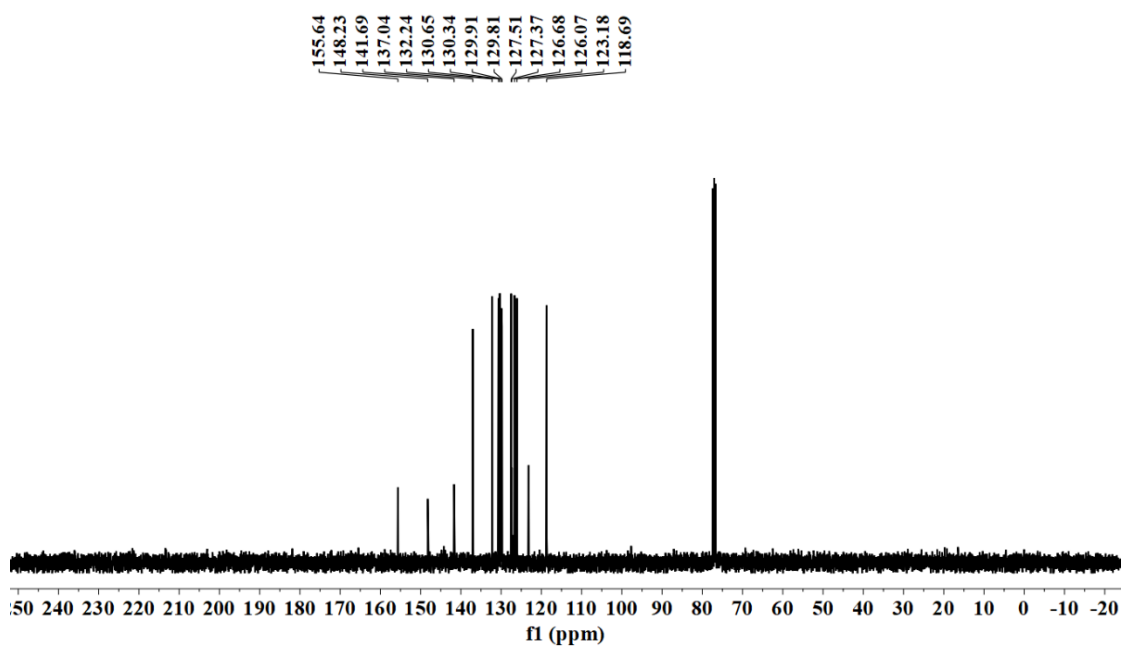

Fig. S47.  $^{13}\text{C}\{^1\text{H}\}$  NMR spectrum of **9a** in  $\text{CDCl}_3$  (101 MHz).

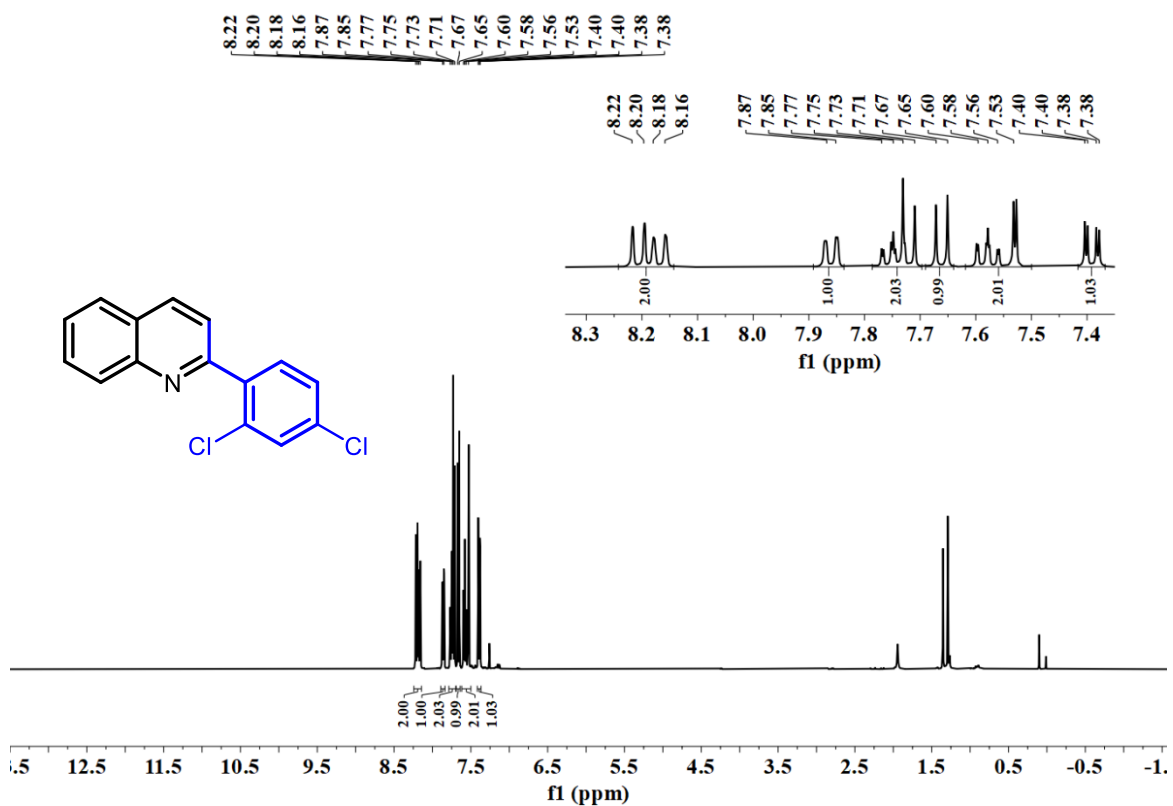

Fig. S48.  $^1\text{H}$  NMR spectrum of **10a** in  $\text{CDCl}_3$  (400 MHz).

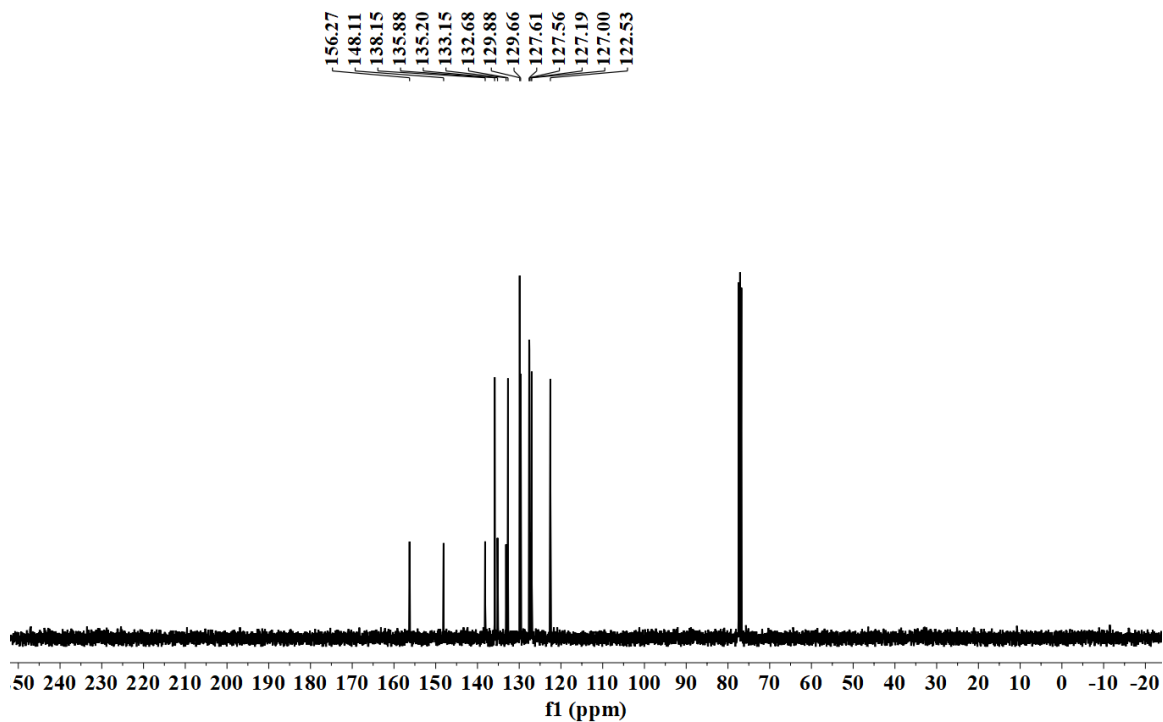

Fig. S49.  $^{13}\text{C}\{^1\text{H}\}$  NMR spectrum of **10a** in  $\text{CDCl}_3$  (101 MHz).

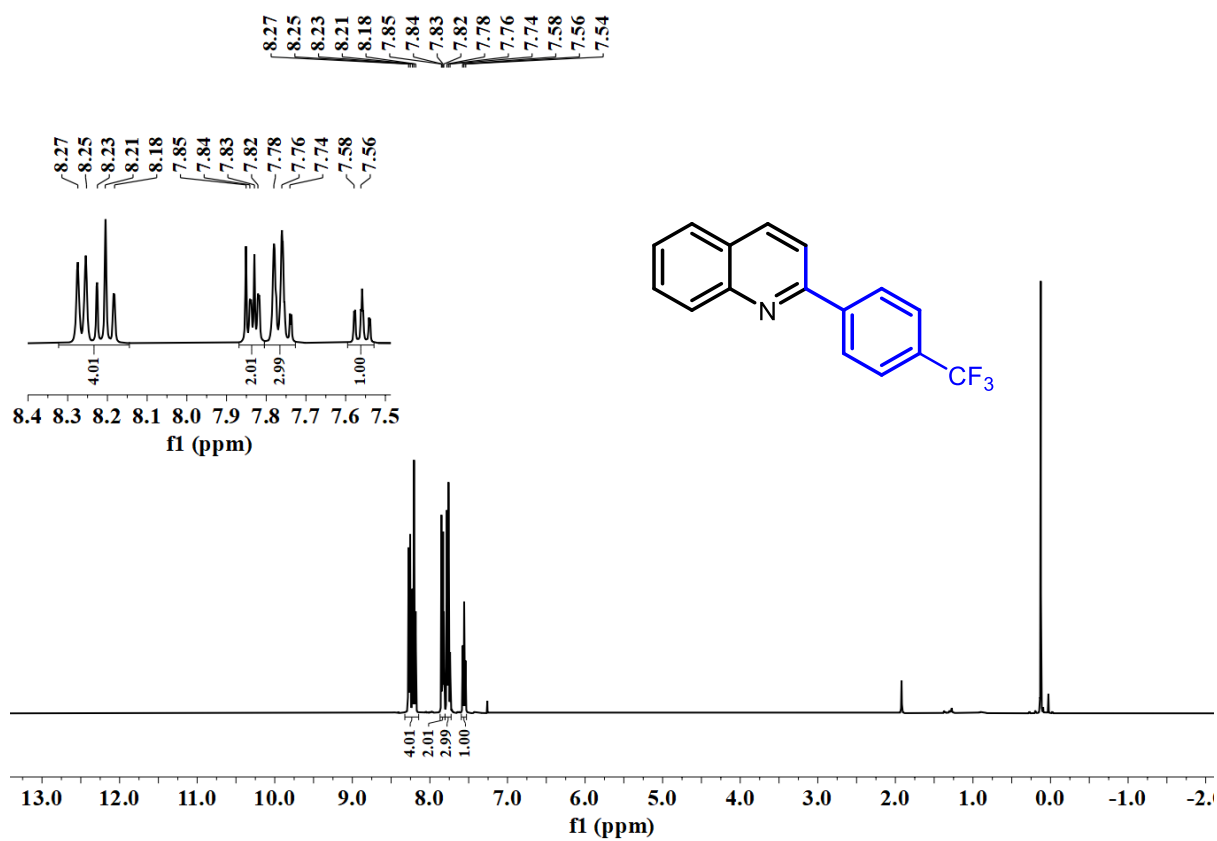

Fig. S50.  $^1\text{H}$  NMR spectrum of **11a** in  $\text{CDCl}_3$  (400 MHz).

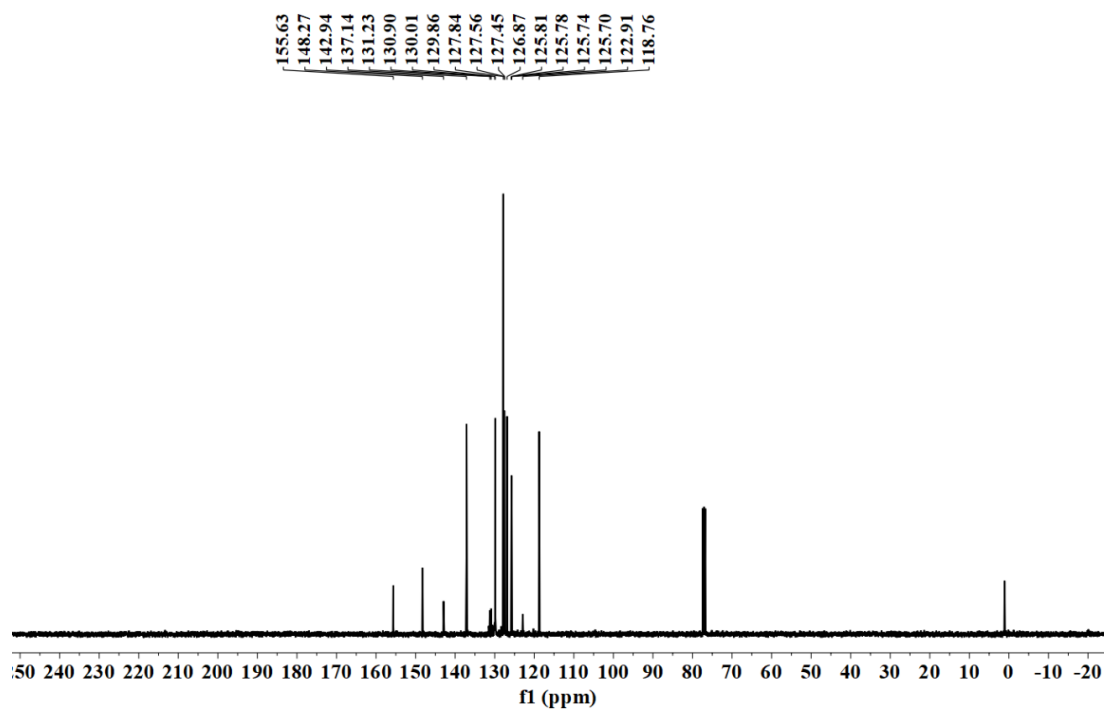

**Fig. S51.**  $^{13}\text{C}\{^1\text{H}\}$  NMR spectrum of **11a** in  $\text{CDCl}_3$  (101 MHz).

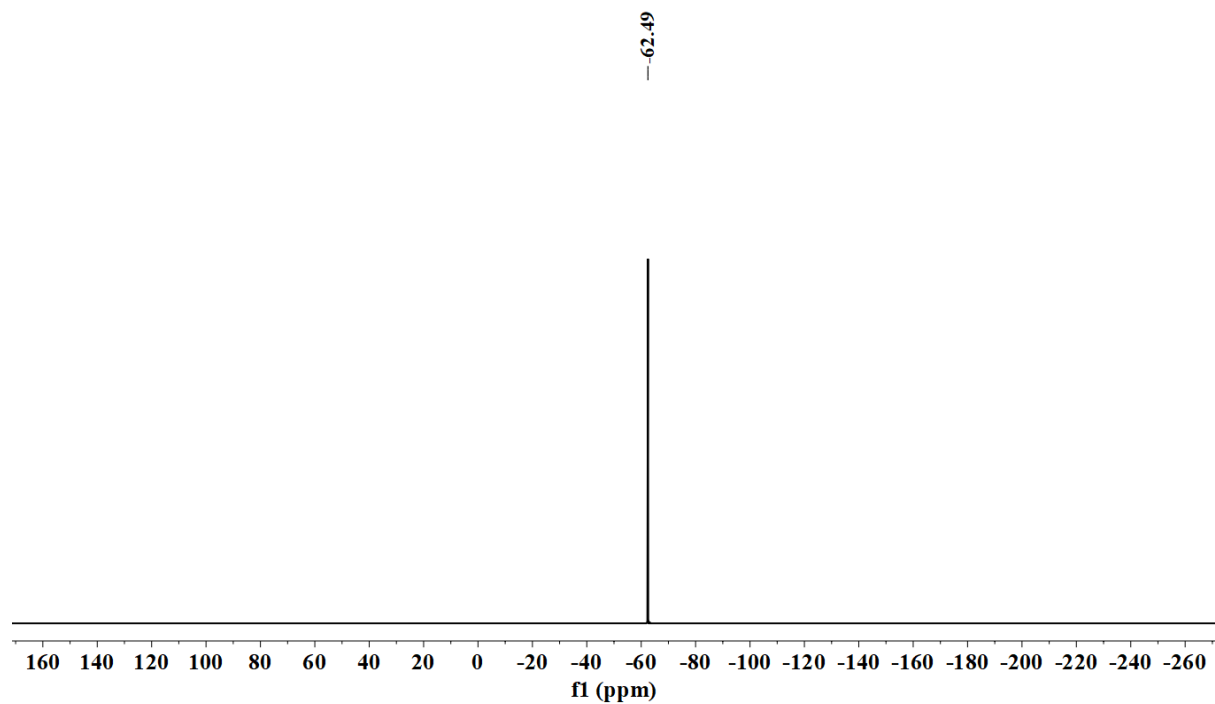

**Fig. S52.**  $^{19}\text{F}\{^1\text{H}\}$  NMR spectrum of **11a** in  $\text{CDCl}_3$  (376 MHz).

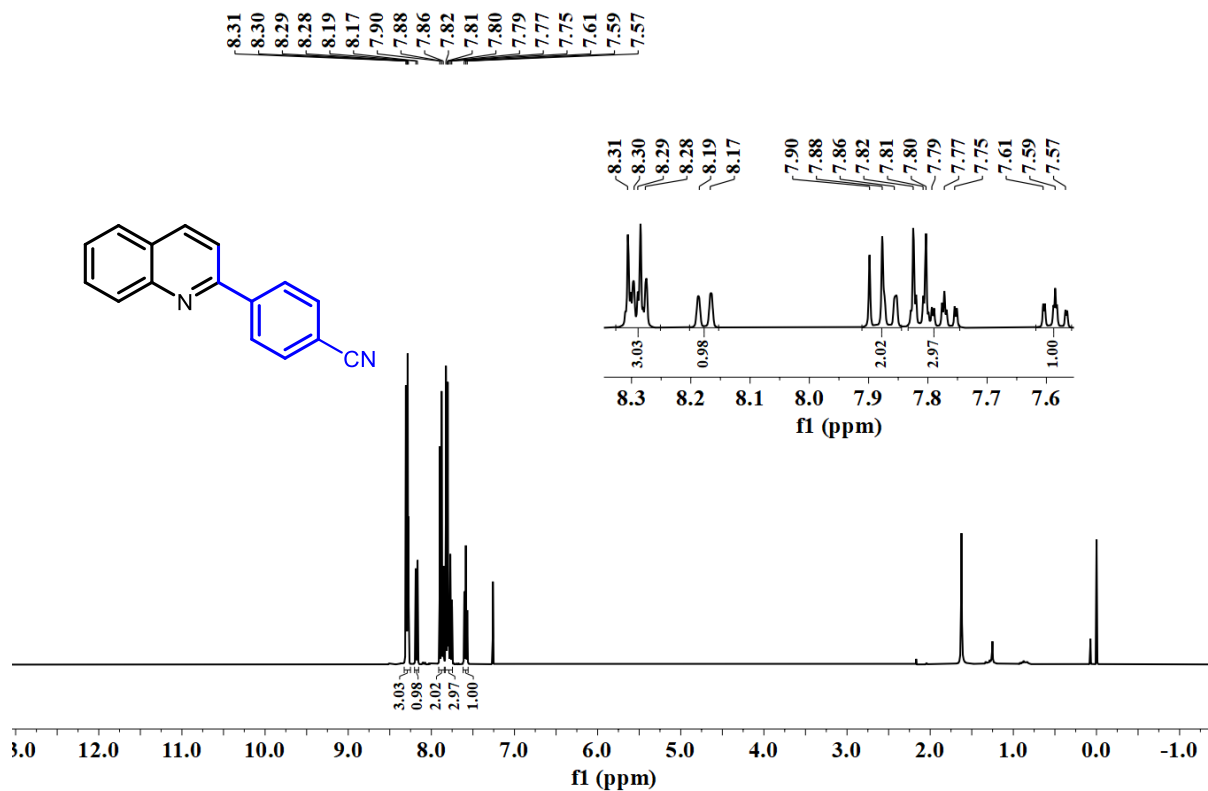

**Fig. S53.**  $^1\text{H}$  NMR spectrum of **12a** in  $\text{CDCl}_3$  (400 MHz).

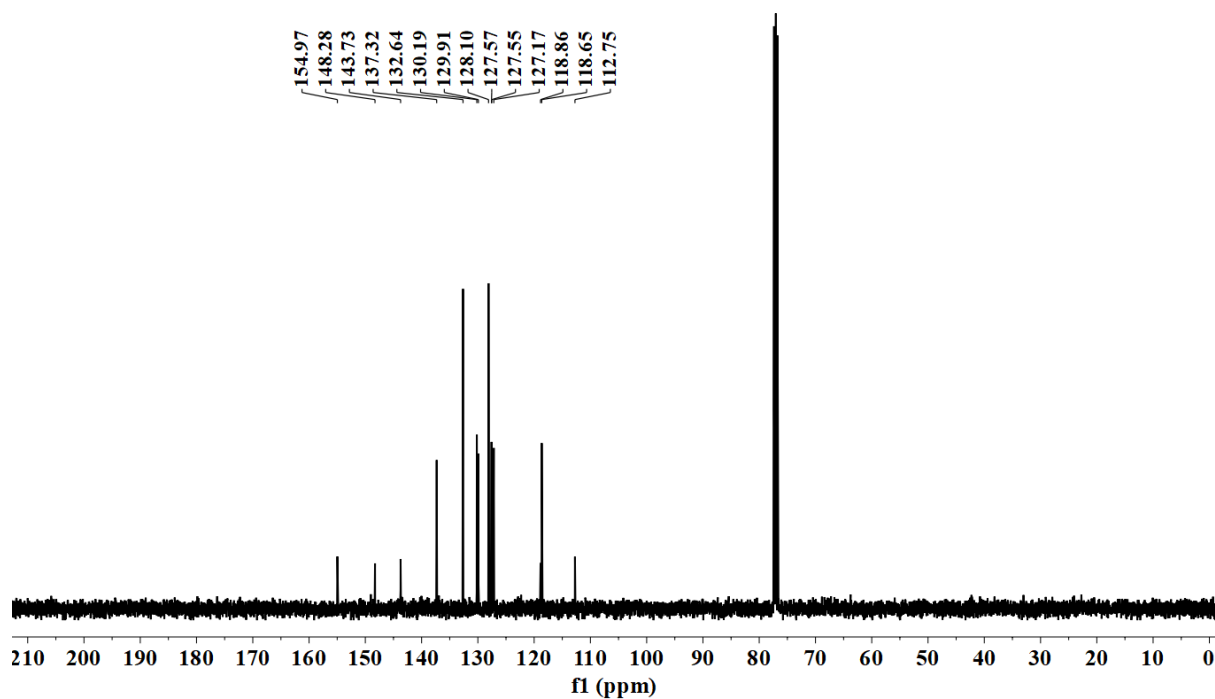

**Fig. S54.**  $^{13}\text{C}\{^1\text{H}\}$  NMR spectrum of **12a** in  $\text{CDCl}_3$  (101 MHz).



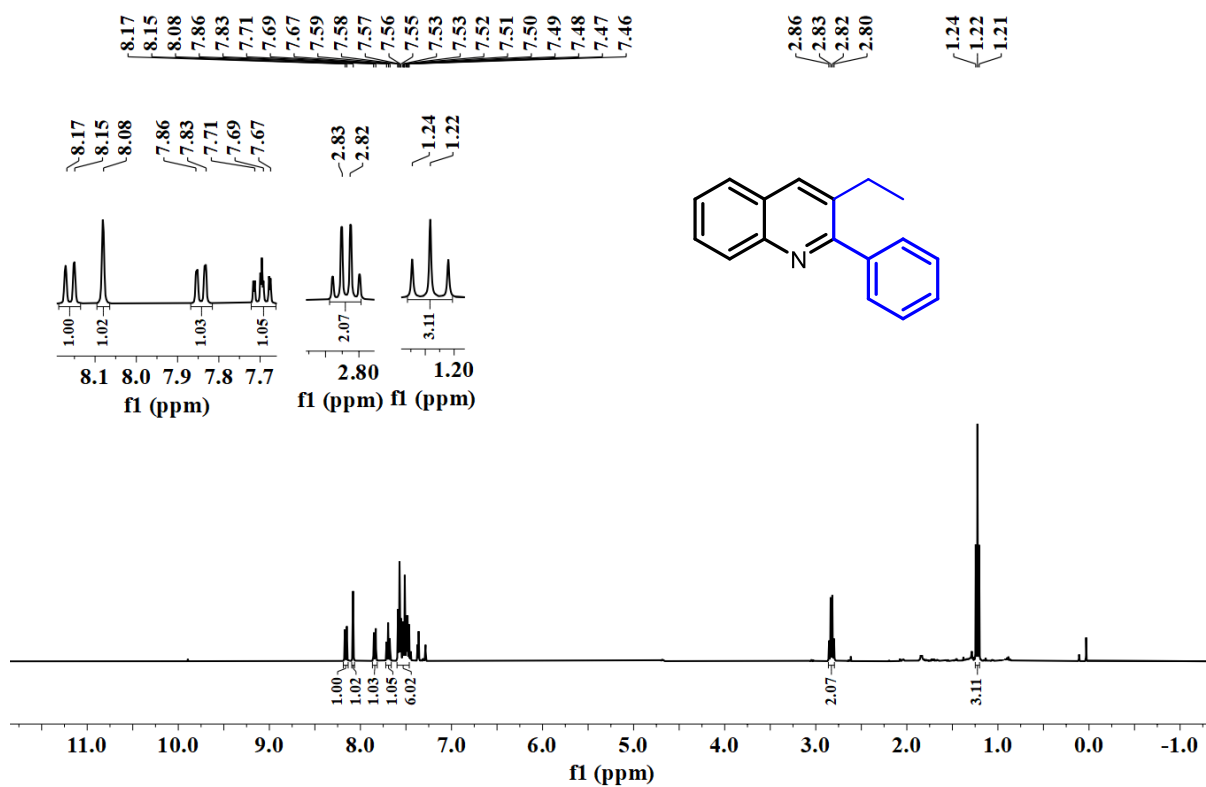

Fig. S55. <sup>1</sup>H NMR spectrum of **13a** in CDCl<sub>3</sub> (500 MHz).

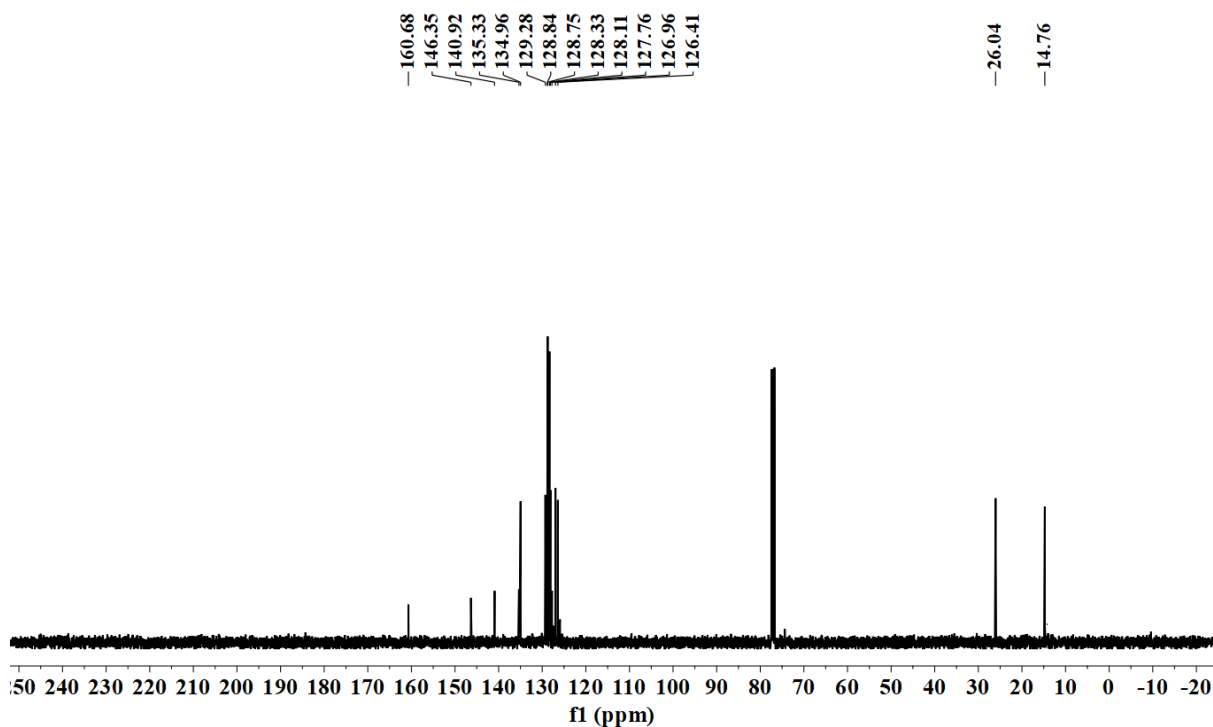

Fig. S56. <sup>13</sup>C {<sup>1</sup>H} NMR spectrum of **13a** in CDCl<sub>3</sub> (101 MHz).

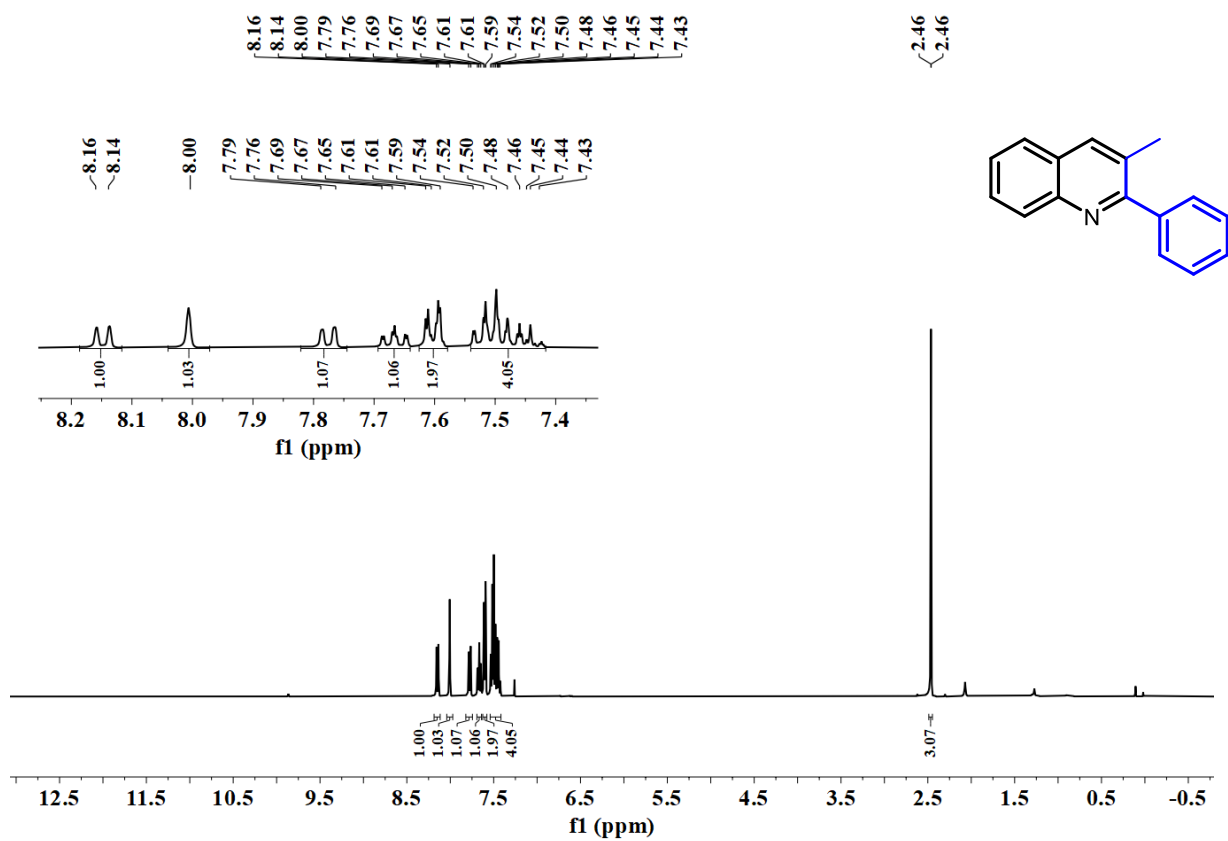

**Fig. S57.** <sup>1</sup>H NMR spectrum of **14a** in CDCl<sub>3</sub> (400 MHz).

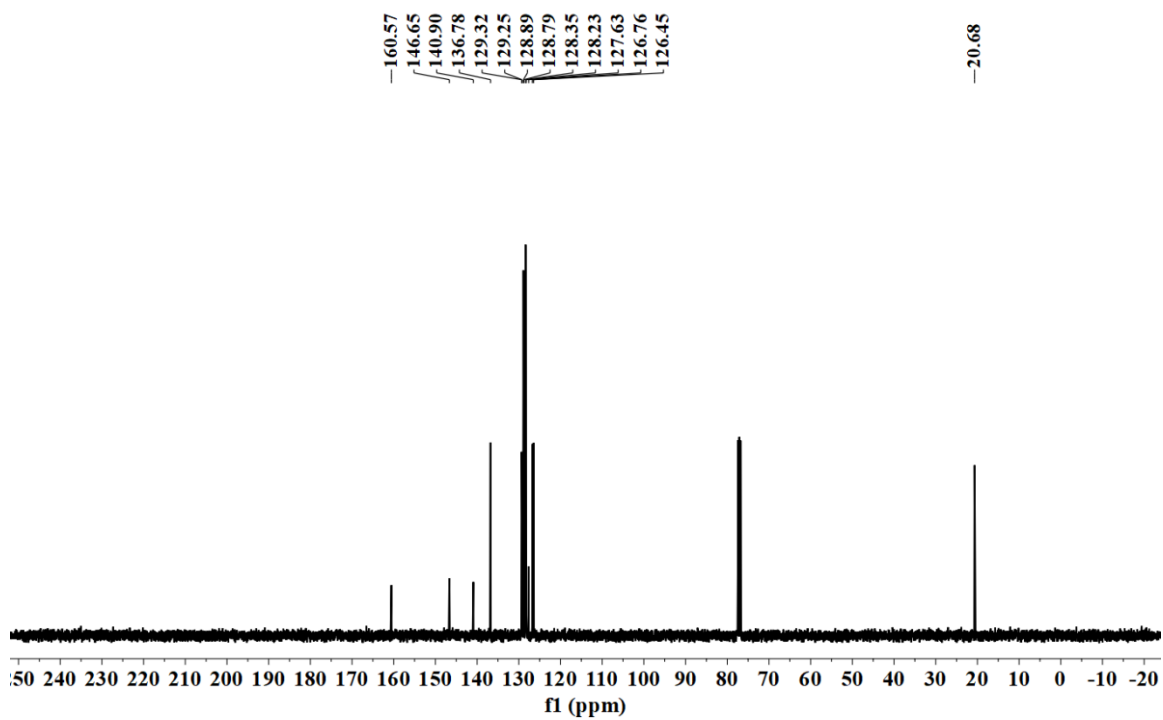

**Fig. S58.** <sup>13</sup>C {<sup>1</sup>H} NMR spectrum of **14a** in CDCl<sub>3</sub> (101 MHz).

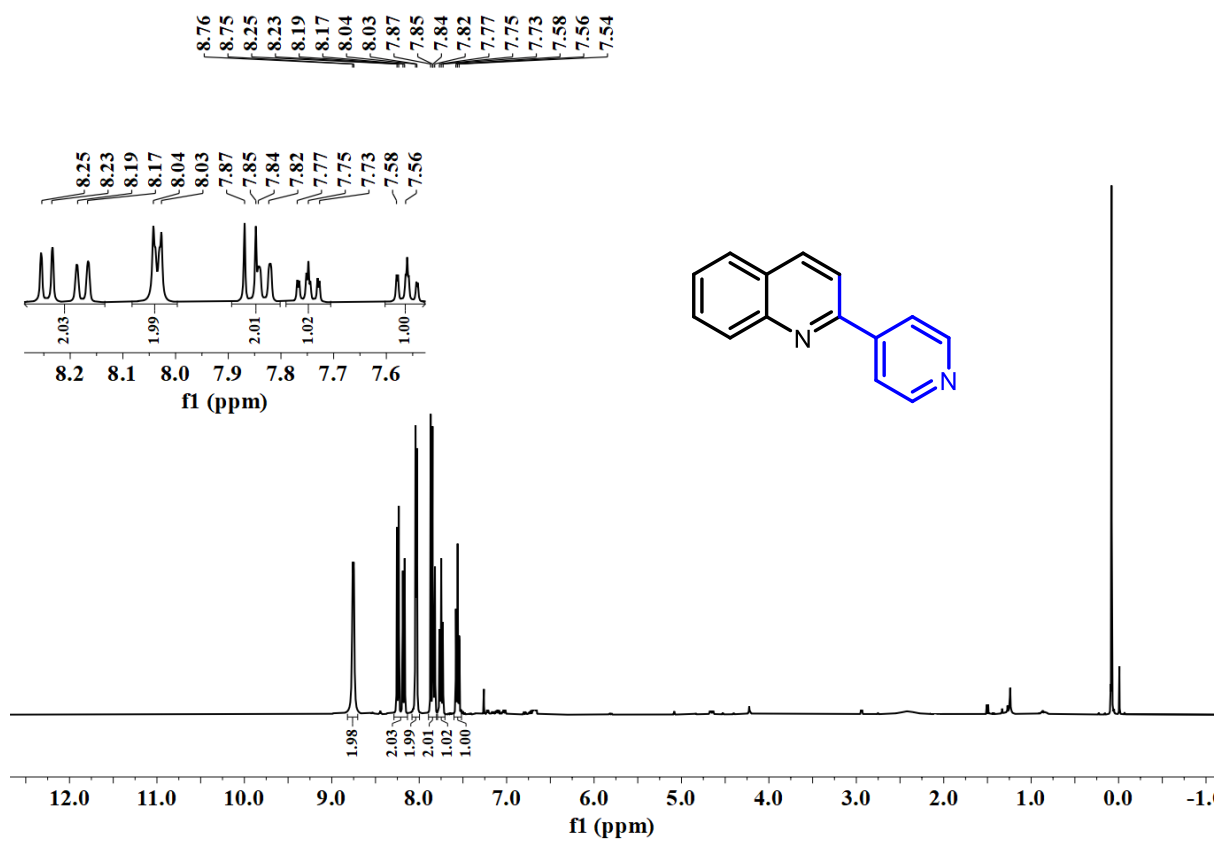

Fig. S59. <sup>1</sup>H NMR spectrum of **15a** in CDCl<sub>3</sub> (400 MHz).

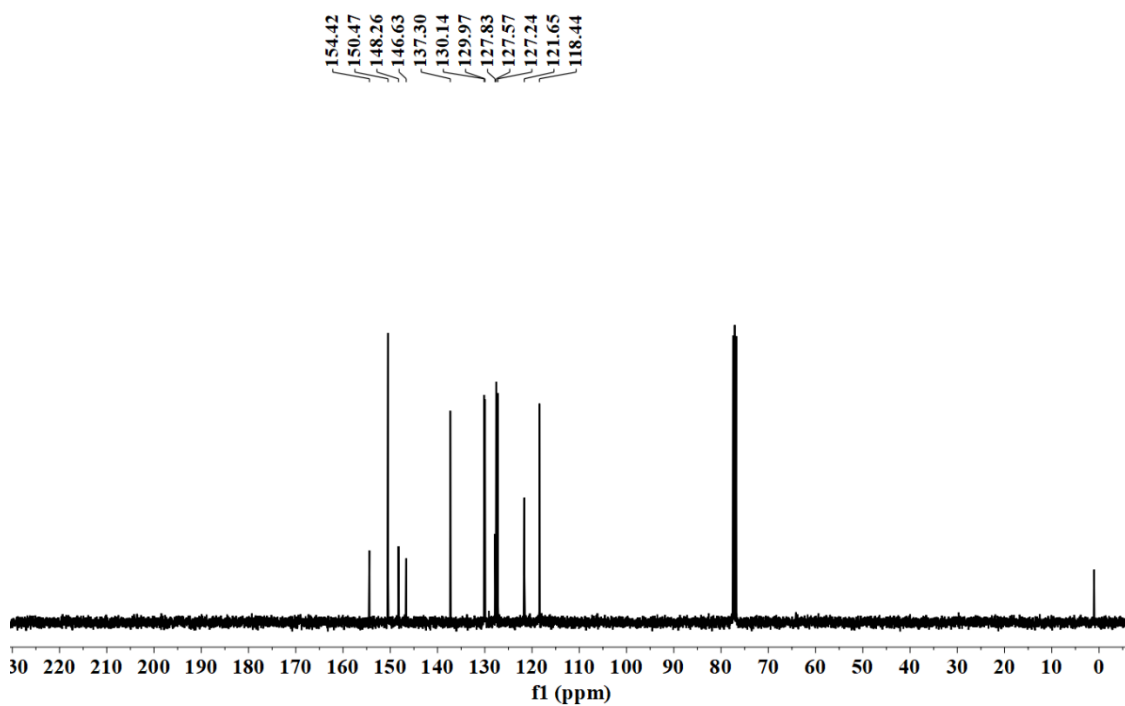

Fig. S60. <sup>13</sup>C{<sup>1</sup>H} NMR spectrum of **15a** in CDCl<sub>3</sub> (101 MHz).

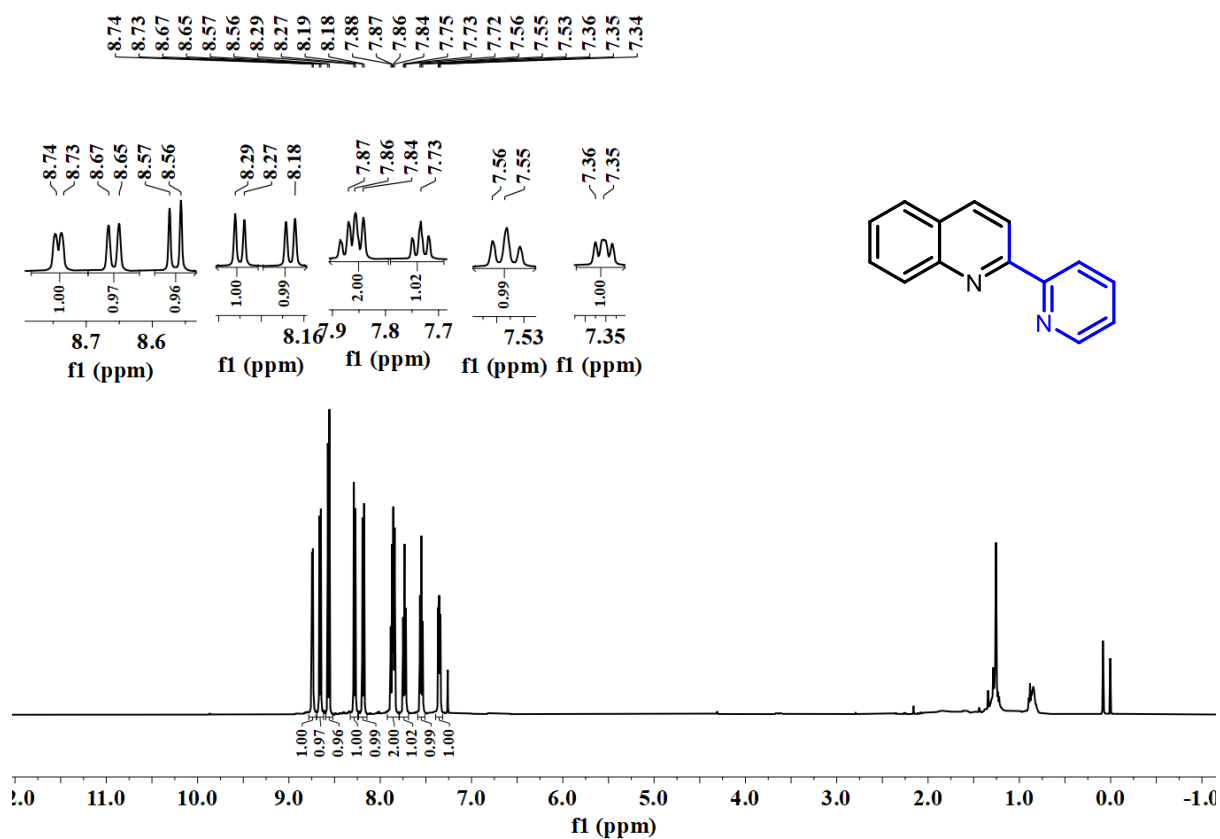

Fig. S61. <sup>1</sup>H NMR spectrum of 16a in CDCl<sub>3</sub> (500 MHz).

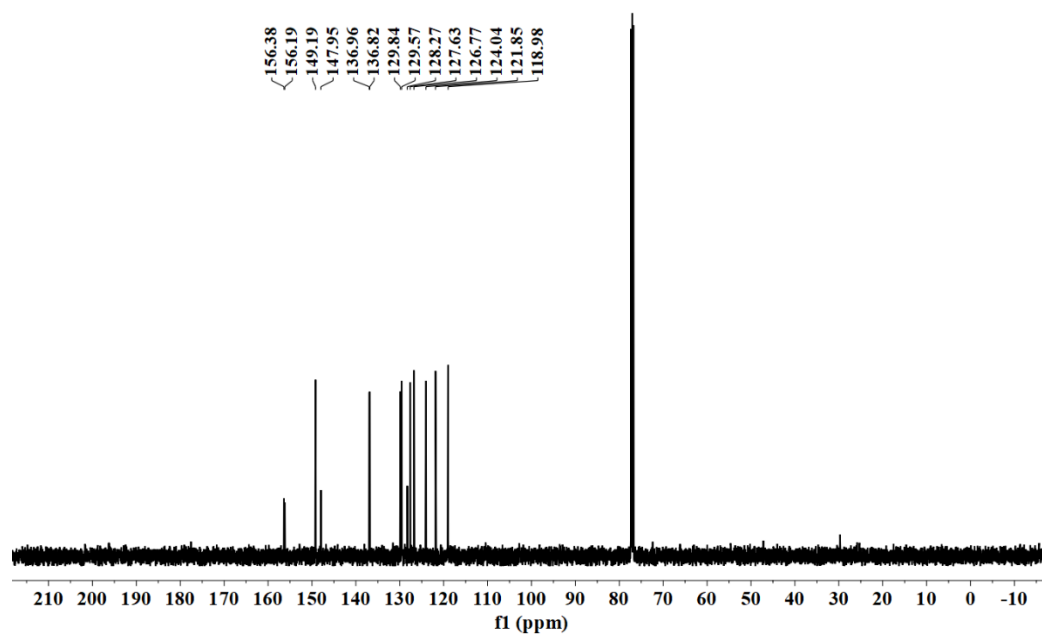

Fig. S62. <sup>13</sup>C{<sup>1</sup>H} NMR spectrum of 16a in CDCl<sub>3</sub> (126 MHz).

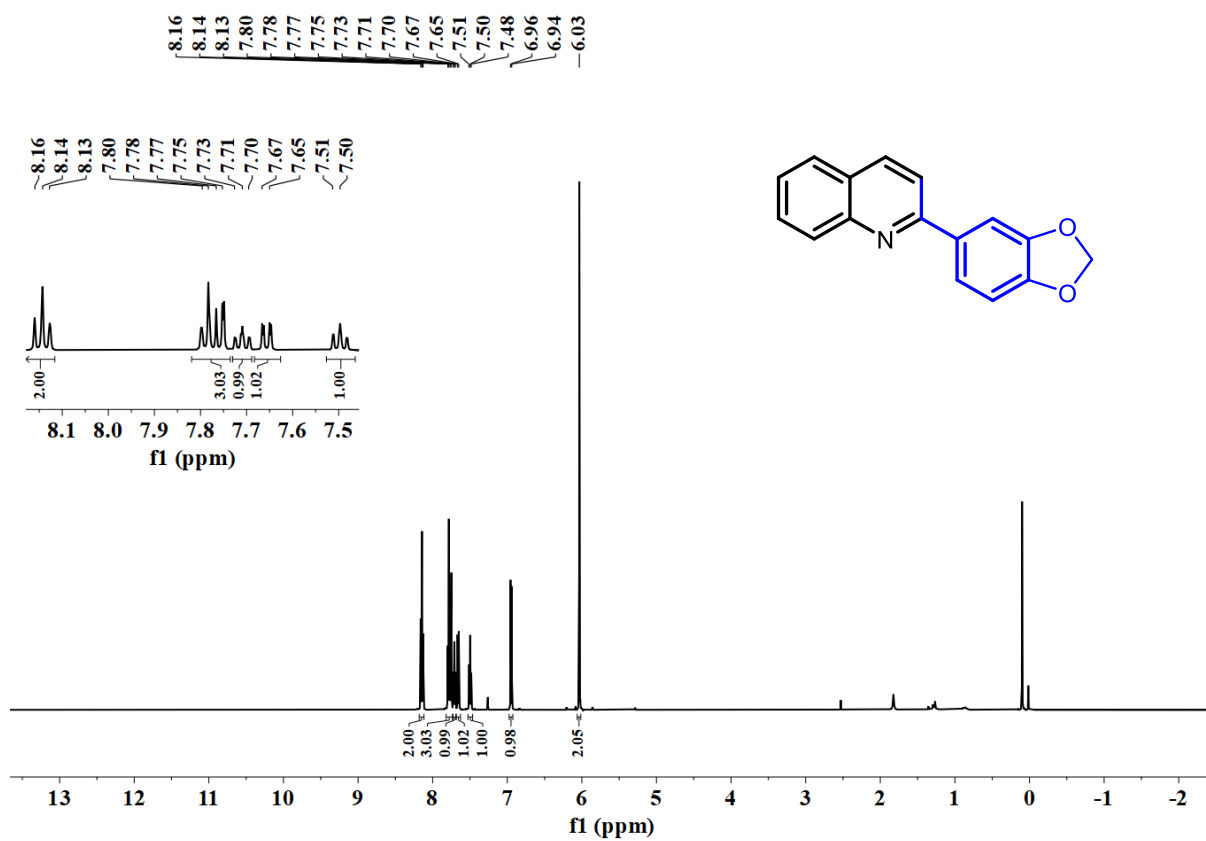

**Fig. S63.** <sup>1</sup>H NMR spectrum of 17a in CDCl<sub>3</sub> (500 MHz).

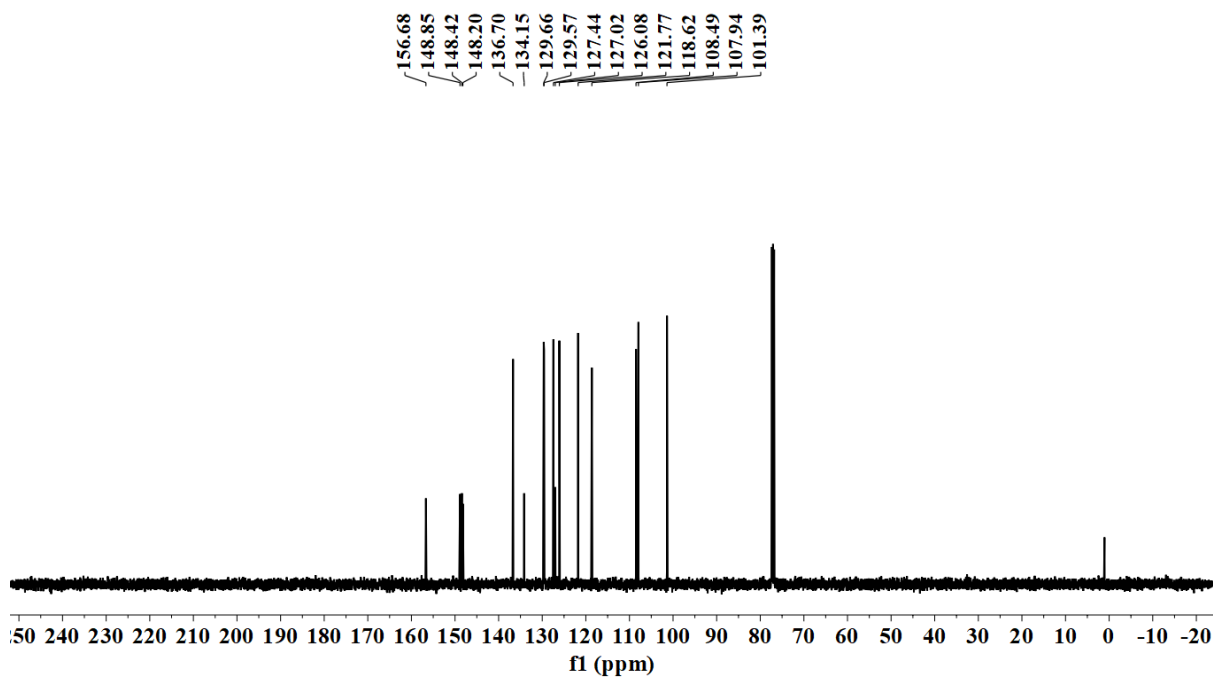

**Fig. S64.** <sup>13</sup>C {<sup>1</sup>H} NMR spectrum of 17a in CDCl<sub>3</sub> (126 MHz).

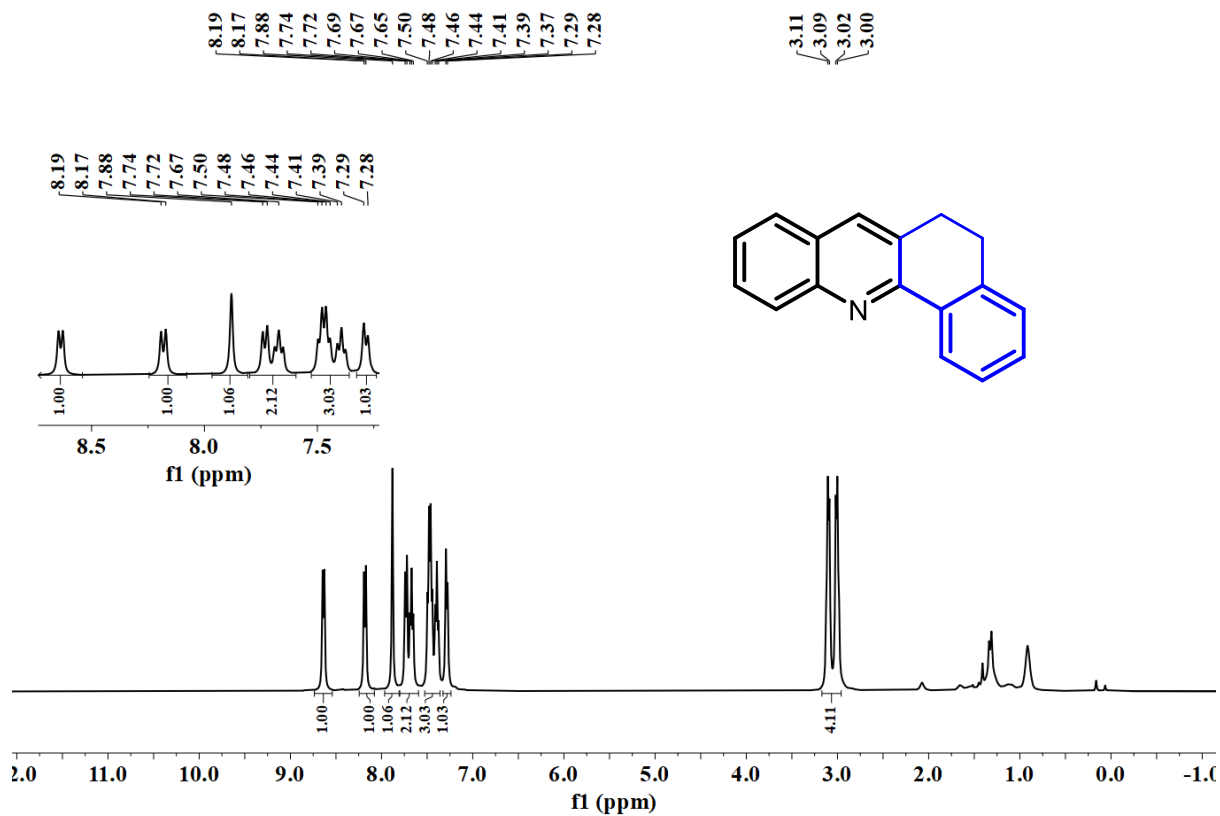

**Fig. S65.**  $^1\text{H}$  NMR spectrum of **18a** in  $\text{CDCl}_3$  (400 MHz).

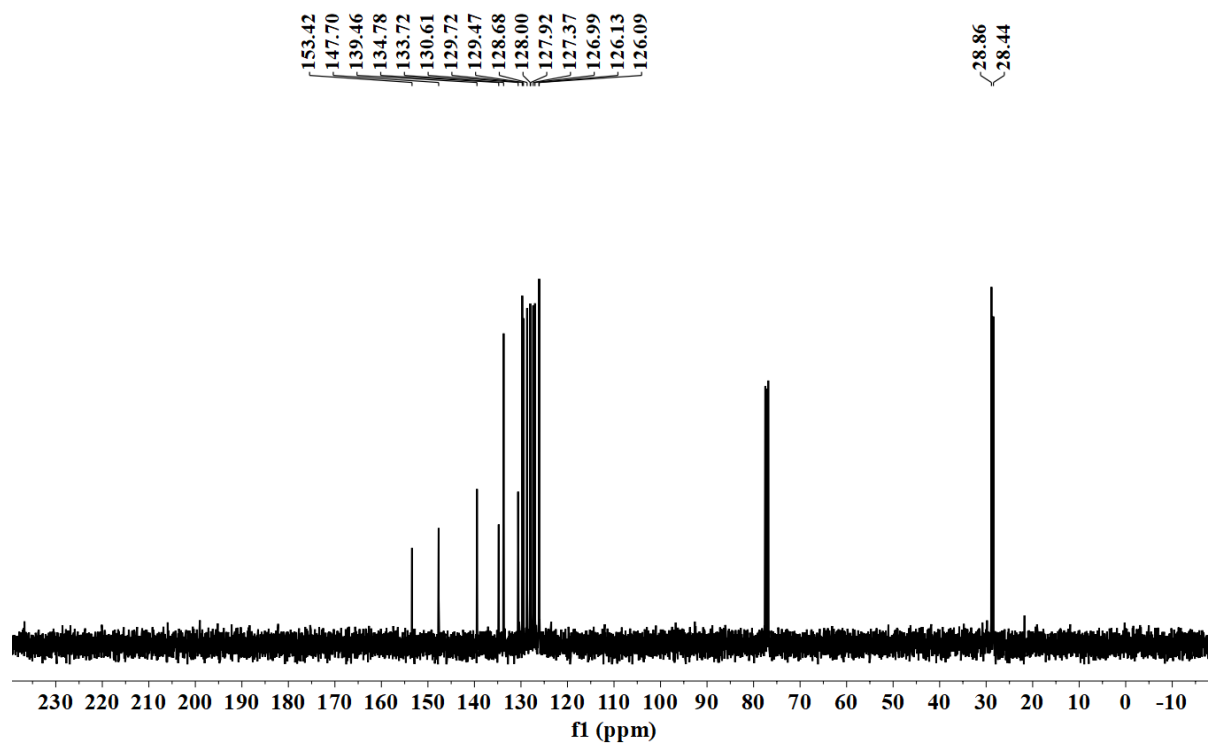

**Fig. S66.**  $^{13}\text{C}\{^1\text{H}\}$  NMR spectrum of **18a** in  $\text{CDCl}_3$  (101 MHz).

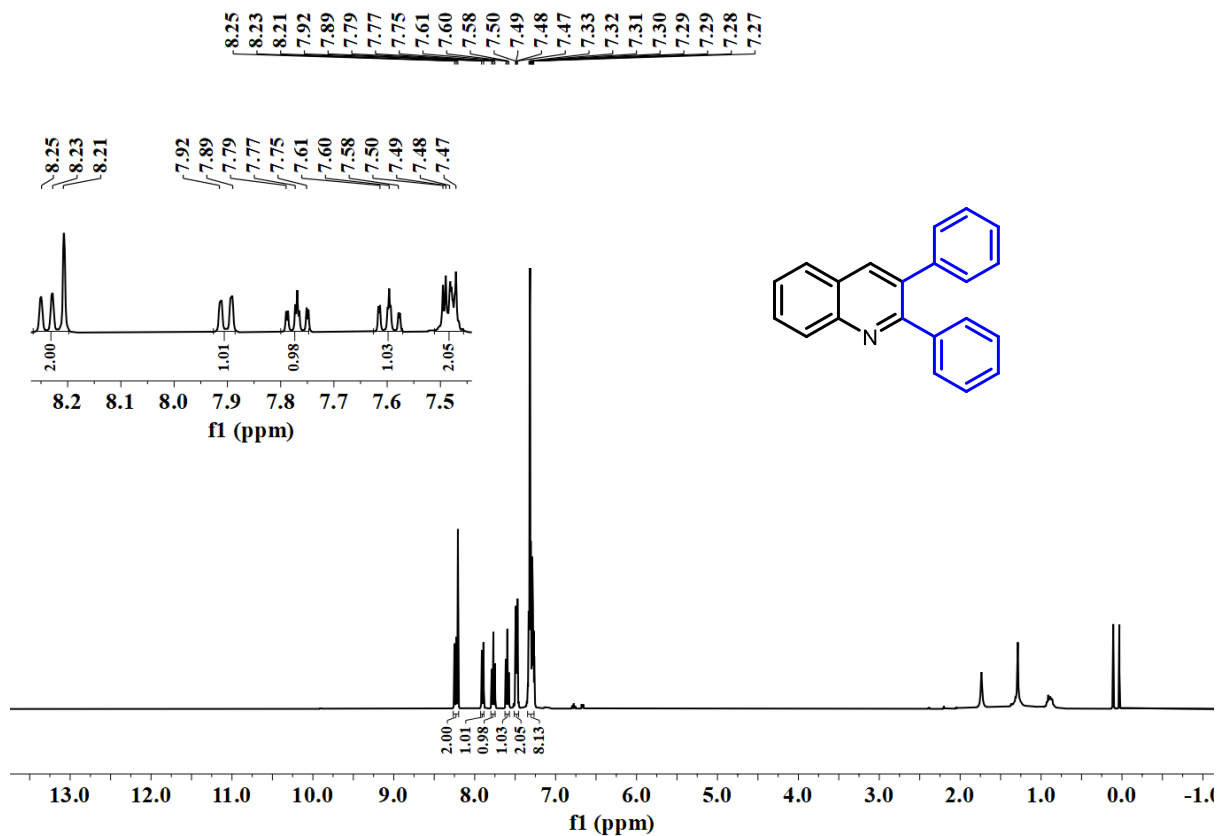

Fig. S67.  $^1\text{H}$  NMR spectrum of 19a in  $\text{CDCl}_3$  (400 MHz).

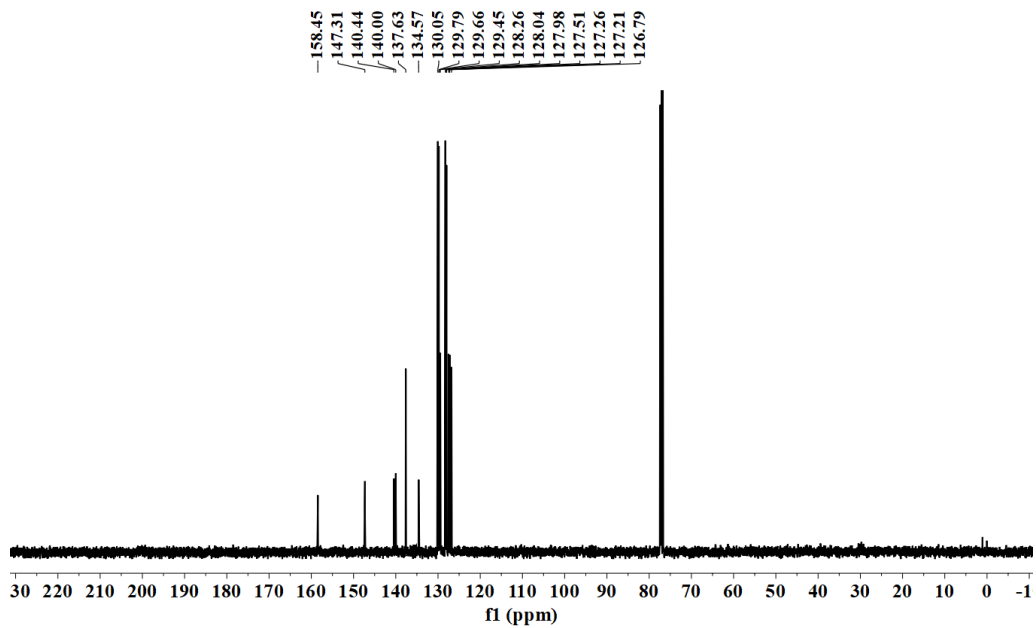

Fig. S68.  $^{13}\text{C}\{^1\text{H}\}$  NMR spectrum of 19a in  $\text{CDCl}_3$  (101 MHz).

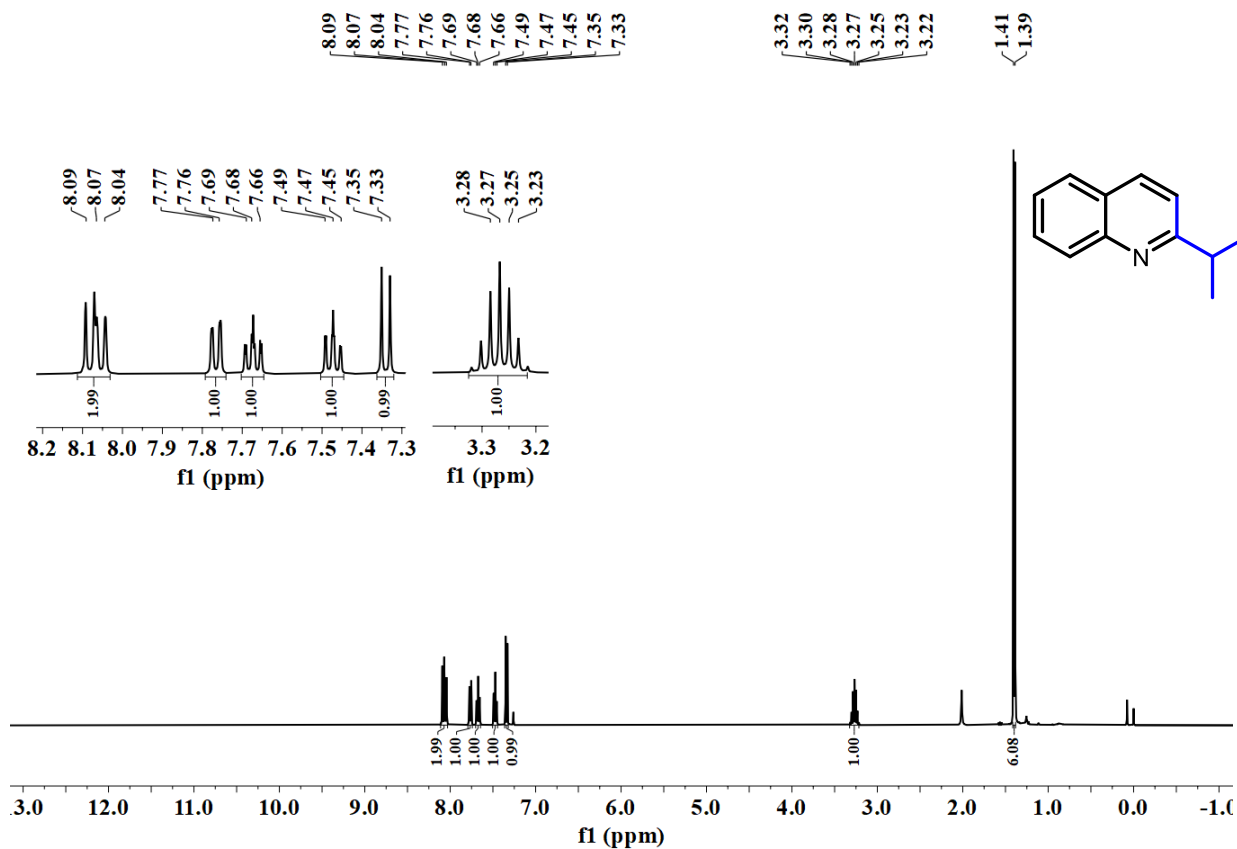

**Fig. S69.** <sup>1</sup>H NMR spectrum of **20a** in CDCl<sub>3</sub> (400 MHz).

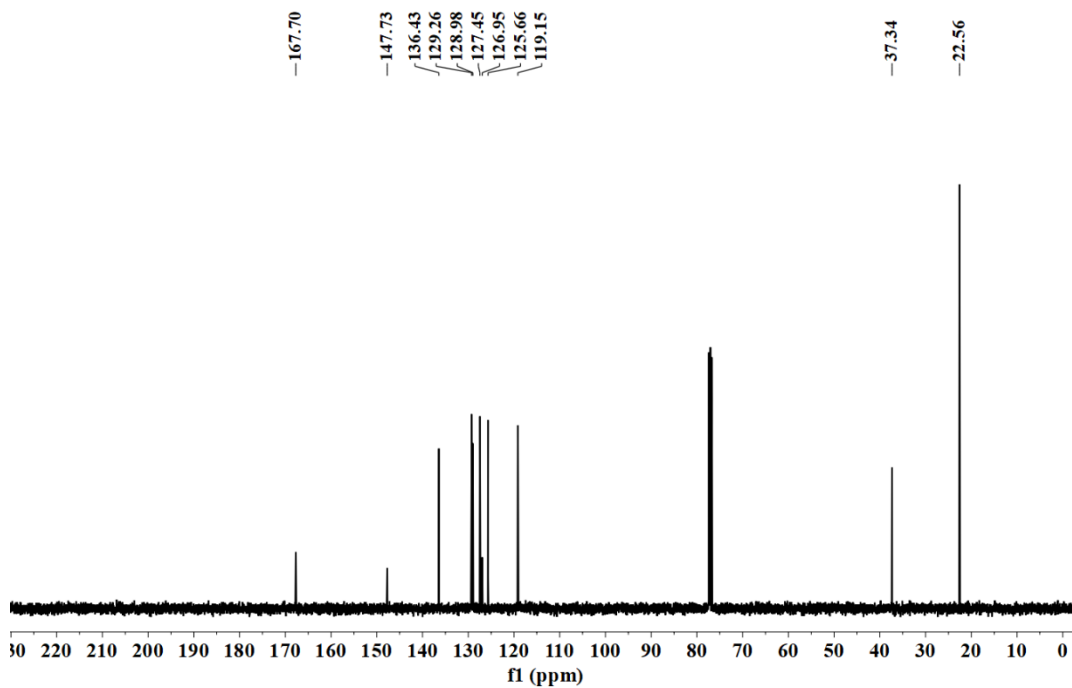

**Fig. S70.** <sup>13</sup>C{<sup>1</sup>H} NMR spectrum of **20a** in CDCl<sub>3</sub> (101 MHz).



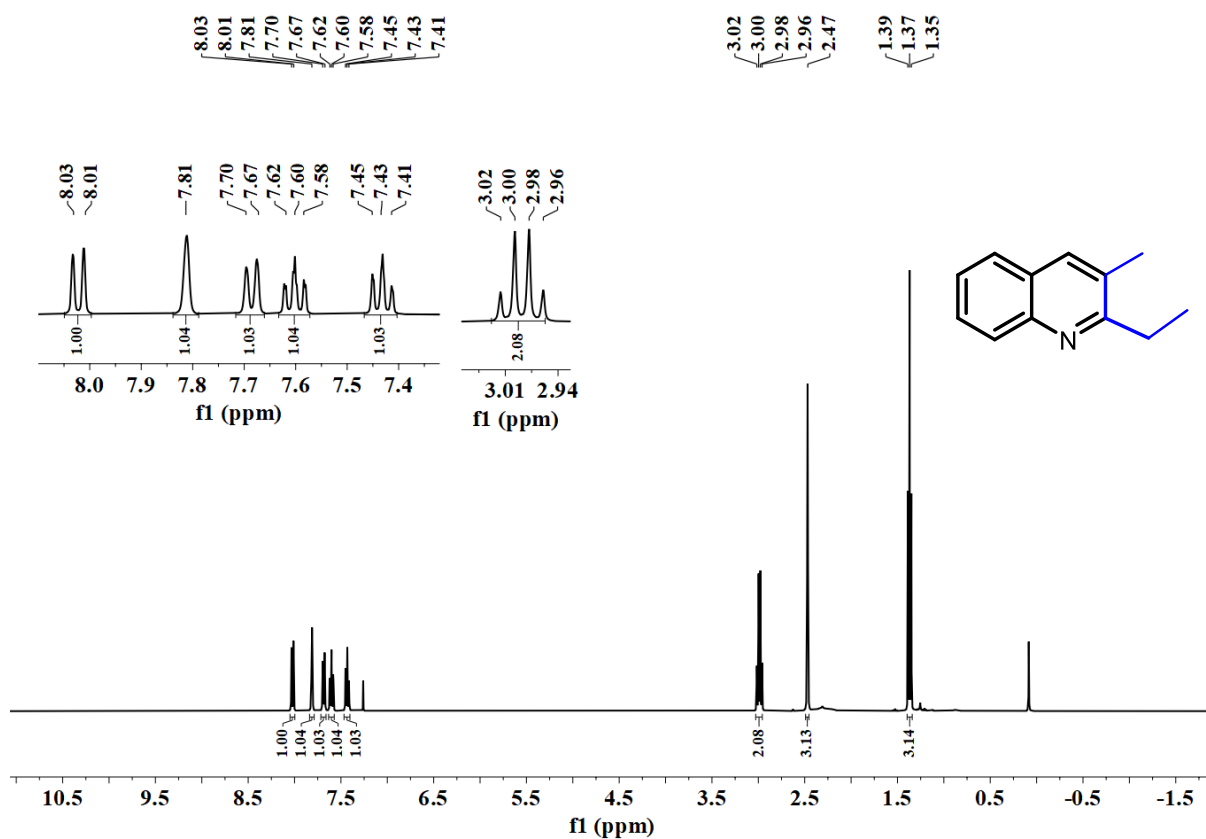

**Fig. S71.** <sup>1</sup>H NMR spectrum of **21a** in CDCl<sub>3</sub> (400 MHz).

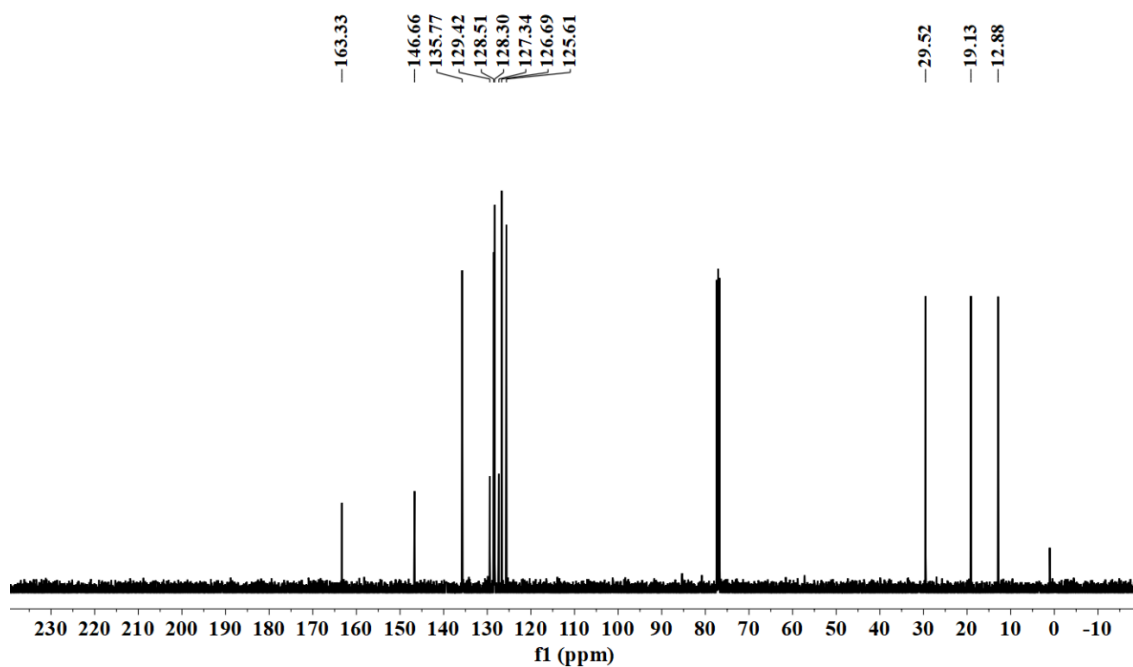

**Fig. S72.** <sup>13</sup>C{<sup>1</sup>H} NMR spectrum of **21a** in CDCl<sub>3</sub> (101 MHz).

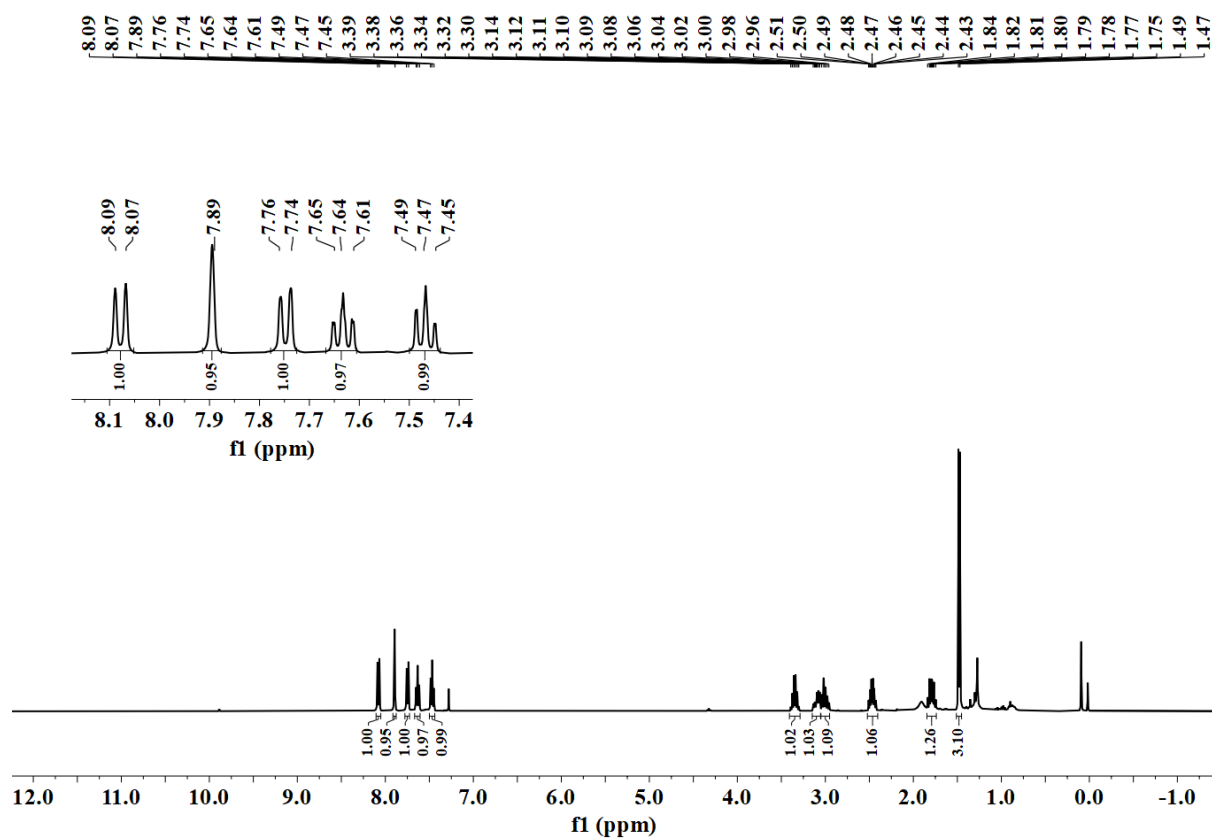

Fig. S73.  $^1\text{H}$  NMR spectrum of **212a** in  $\text{CDCl}_3$  (400 MHz).

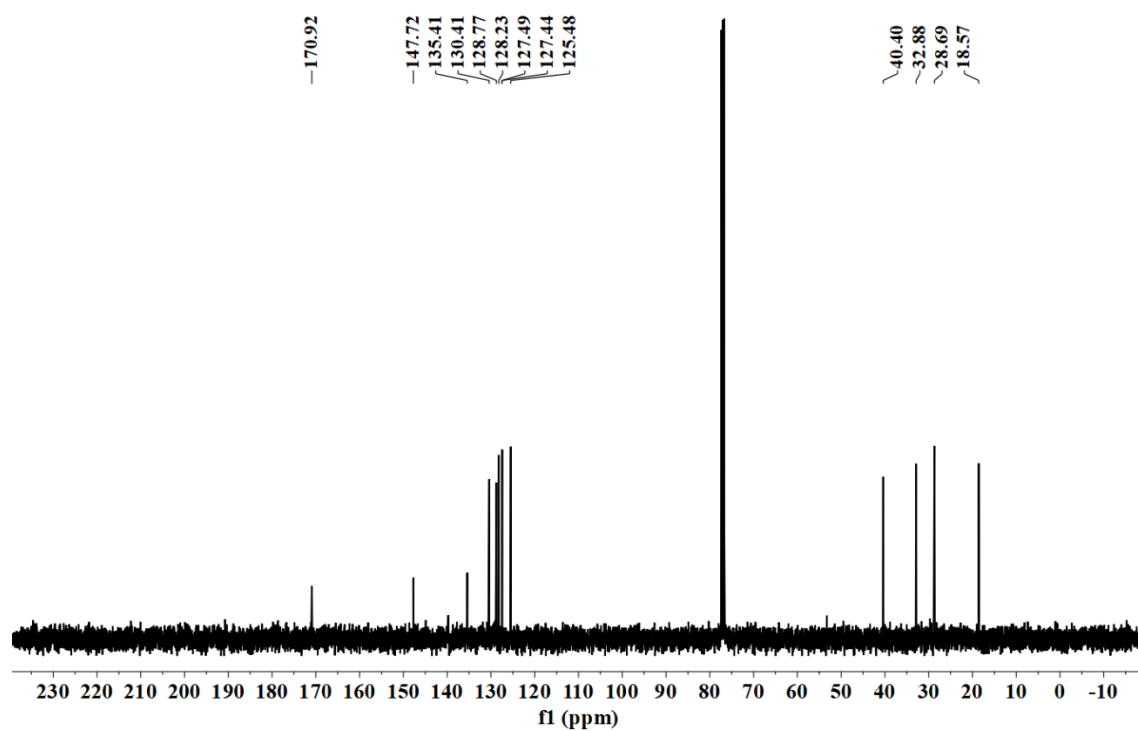

Fig. S74.  $^{13}\text{C}\{^1\text{H}\}$  NMR spectrum of **22a** in  $\text{CDCl}_3$  (101 MHz).

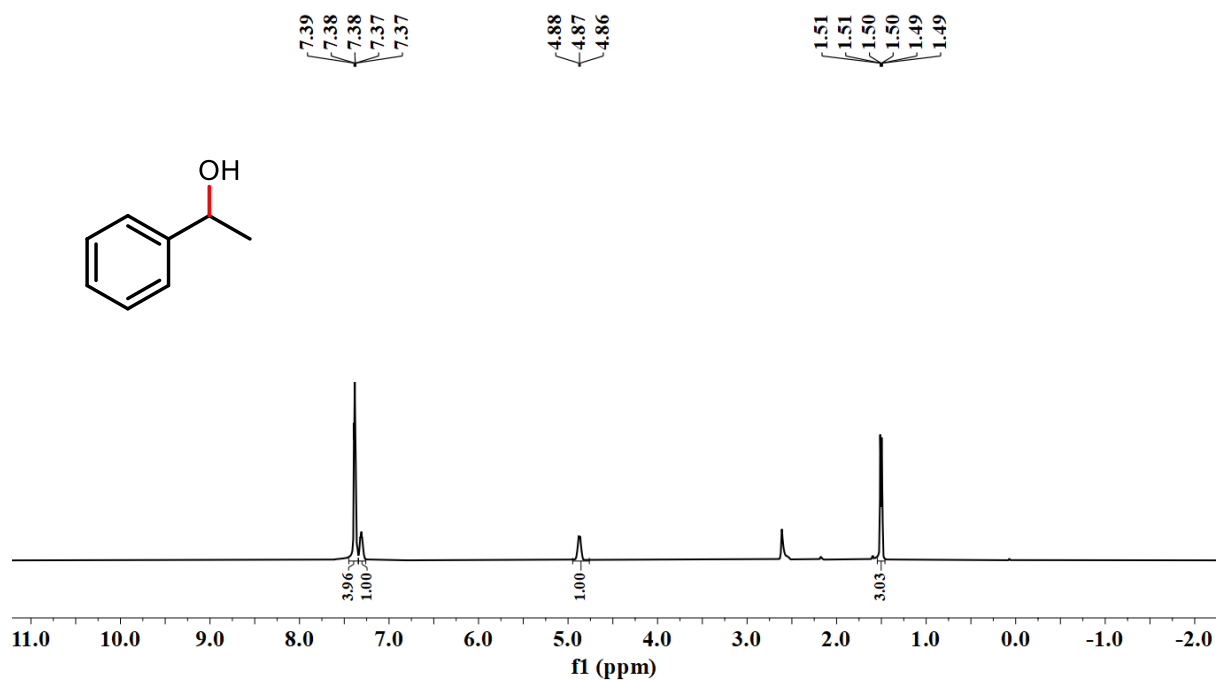

**Fig. S75.**  $^1\text{H}$  NMR spectrum of **1b** in  $\text{CDCl}_3$  (400 MHz).

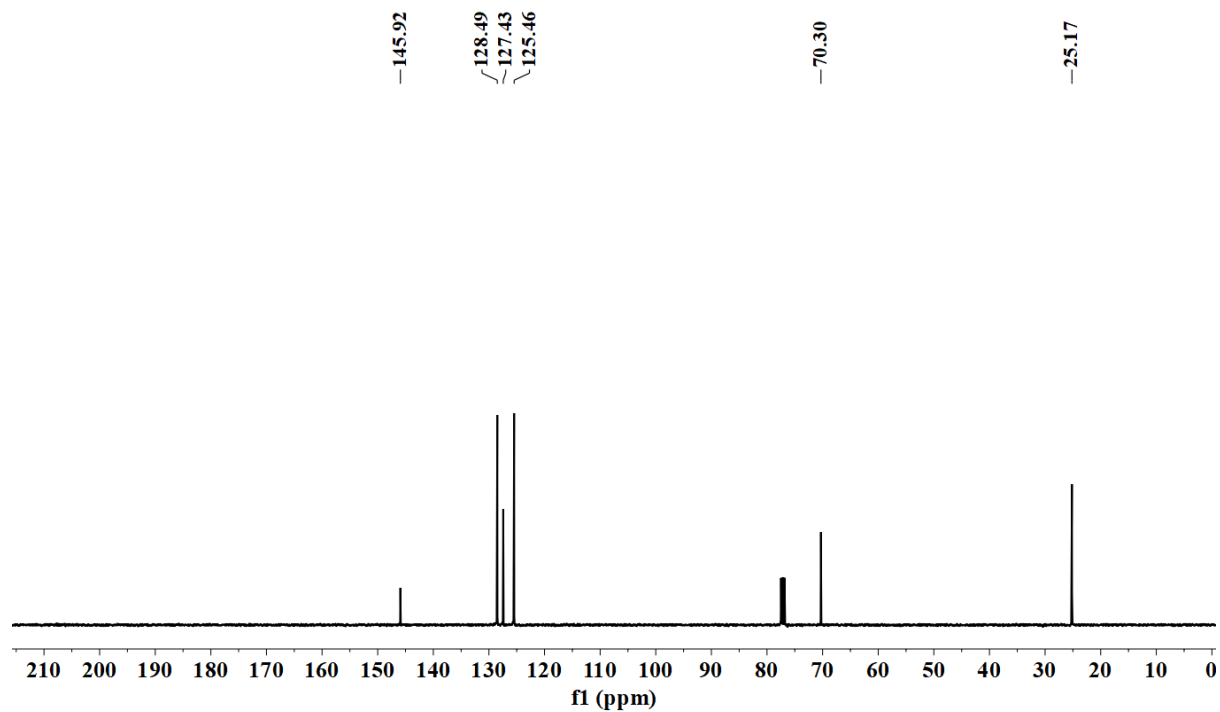

**Fig. S76.**  $^{13}\text{C}\{^1\text{H}\}$  NMR spectrum of **1b** in  $\text{CDCl}_3$  (101 MHz).

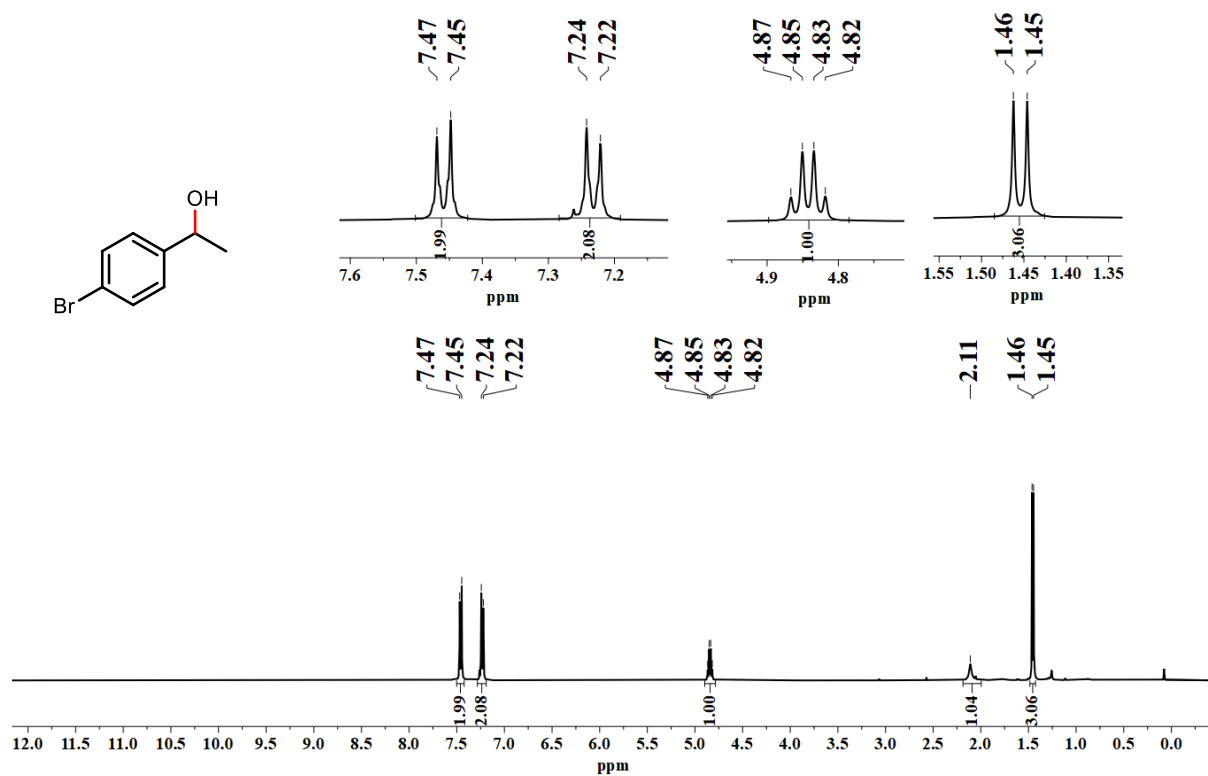

**Fig. S77.**  $^1\text{H}$  NMR spectrum of **2b** in  $\text{CDCl}_3$  (400 MHz).

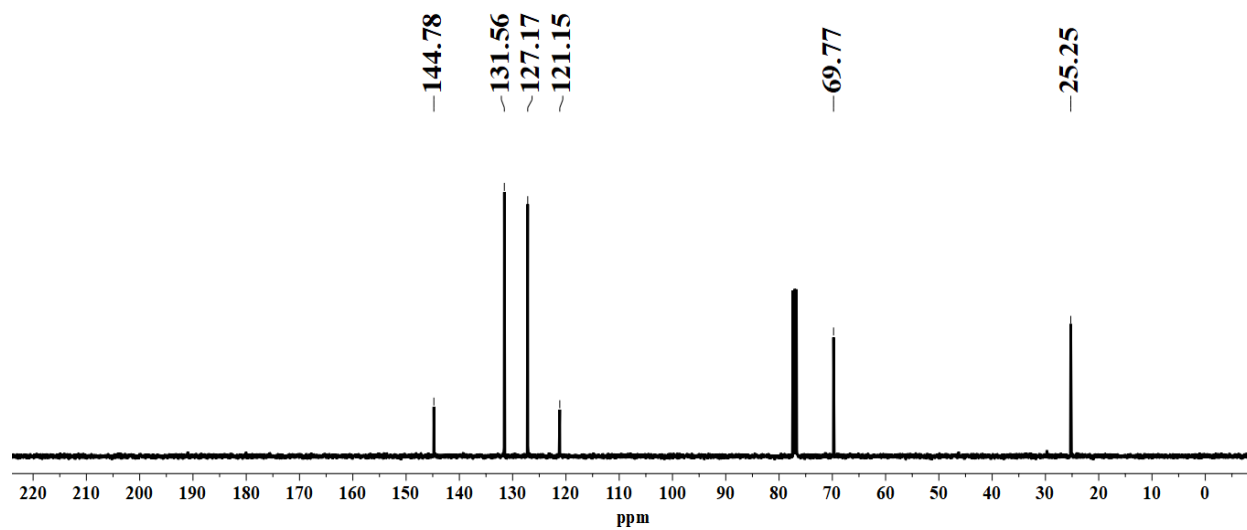

**Fig. S78.**  $^{13}\text{C}\{^1\text{H}\}$  NMR spectrum of **2b** in  $\text{CDCl}_3$  (101 MHz).

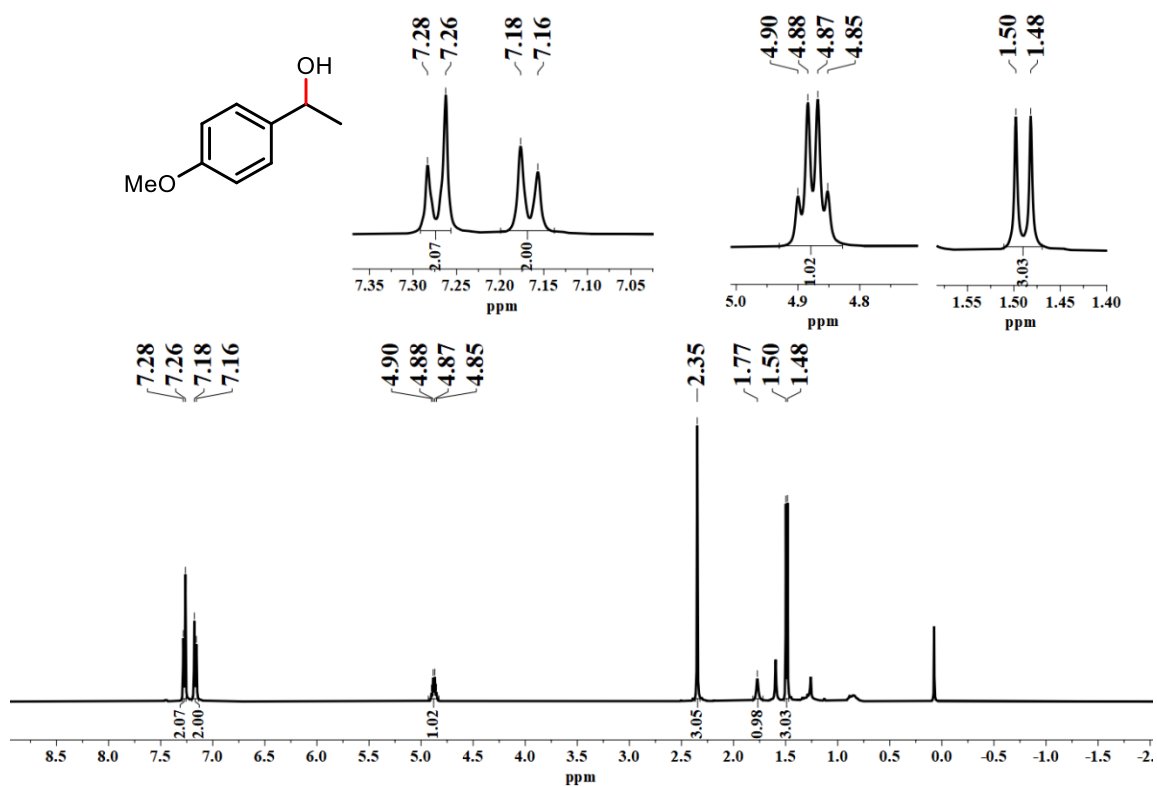

**Fig. S79.**  $^1\text{H}$  NMR spectrum of **3b** in  $\text{CDCl}_3$  (400 MHz).

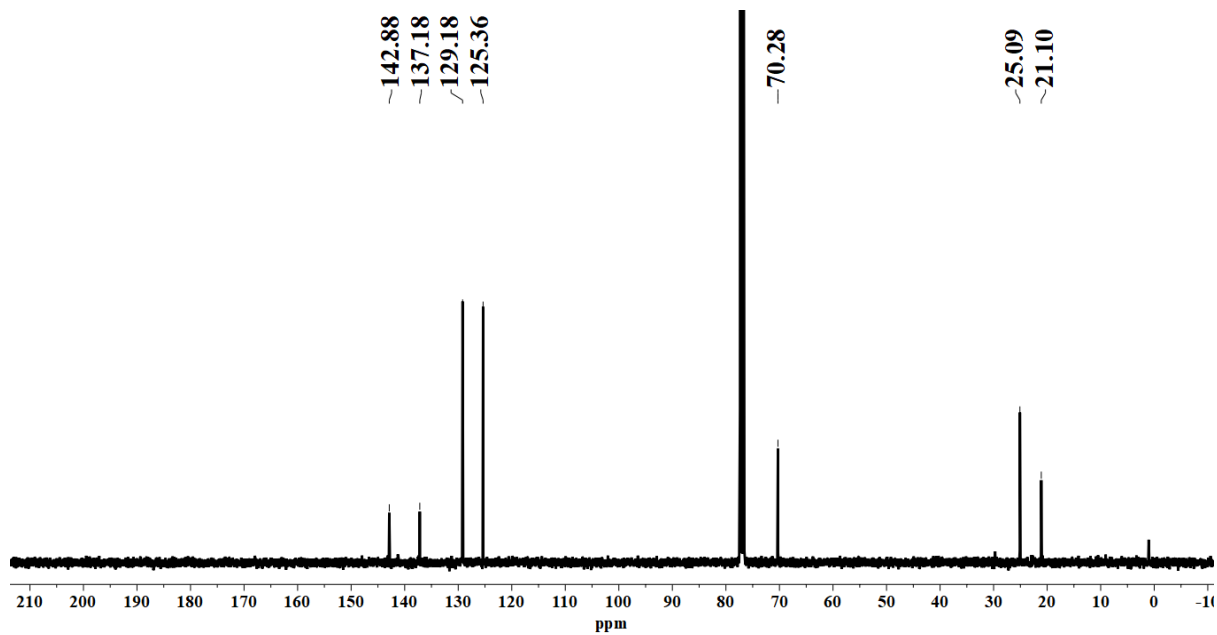

**Fig. S80.**  $^{13}\text{C}$   $\{^1\text{H}\}$  NMR spectrum of **3b** in  $\text{CDCl}_3$  (101 MHz).

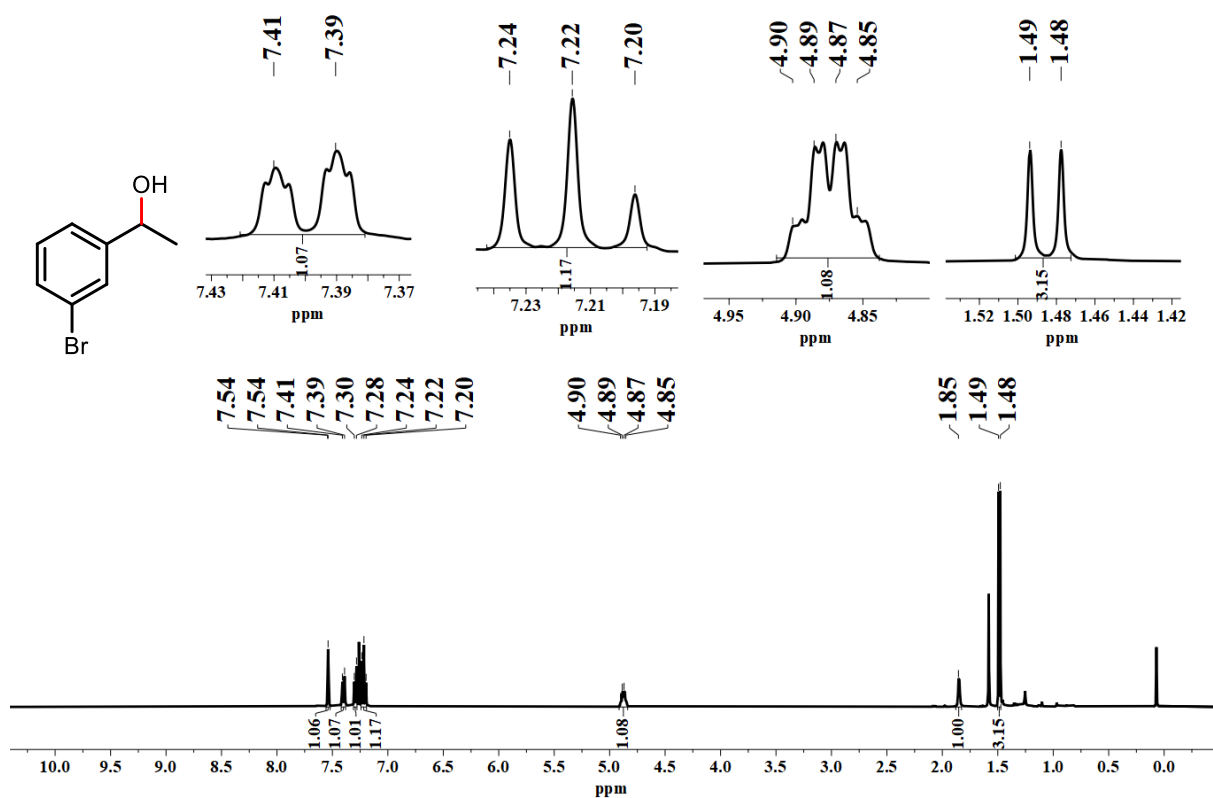

Fig. S81. <sup>1</sup>H NMR spectrum of **4b** in CDCl<sub>3</sub> (400 MHz).

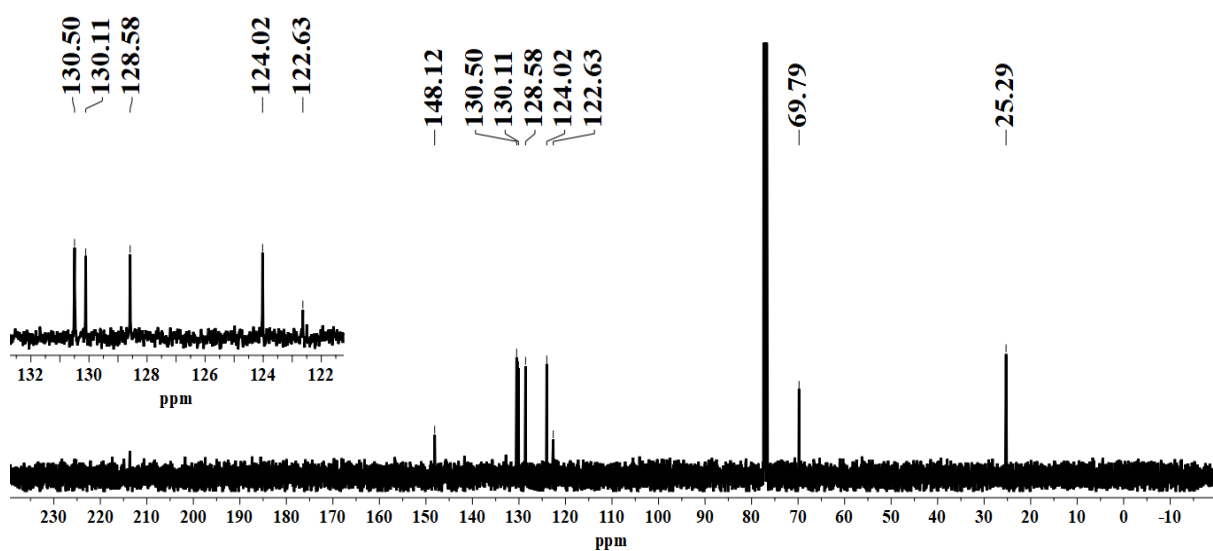

Fig. S82. <sup>13</sup>C {<sup>1</sup>H} NMR spectrum of **4b** in CDCl<sub>3</sub> (101 MHz).

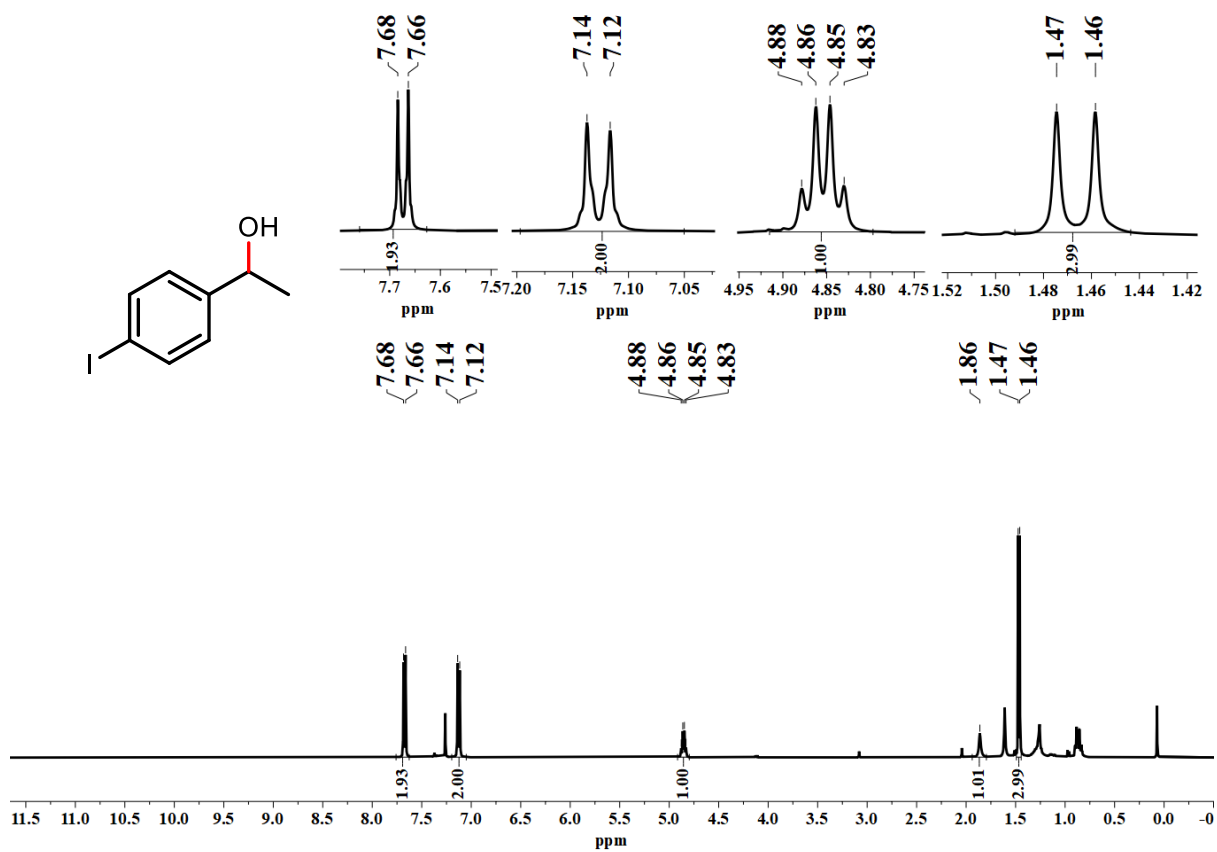

**Fig. S83.**  $^1\text{H}$  NMR spectrum of **5b** in  $\text{CDCl}_3$  (400 MHz).

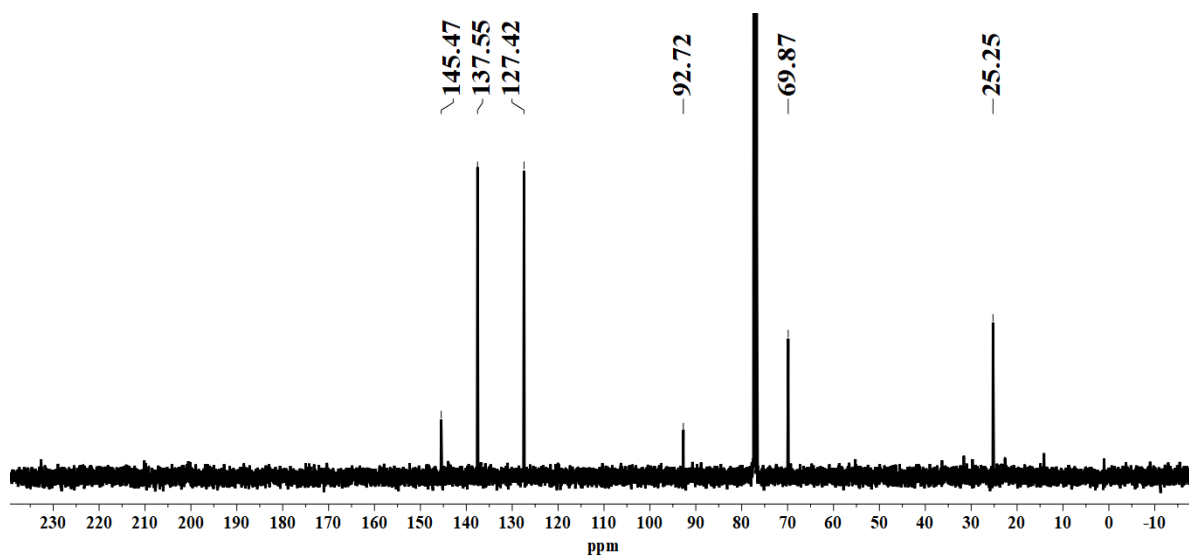

**Fig. S84.**  $^{13}\text{C}\{^1\text{H}\}$  NMR spectrum of **5b** in  $\text{CDCl}_3$  (101 MHz).

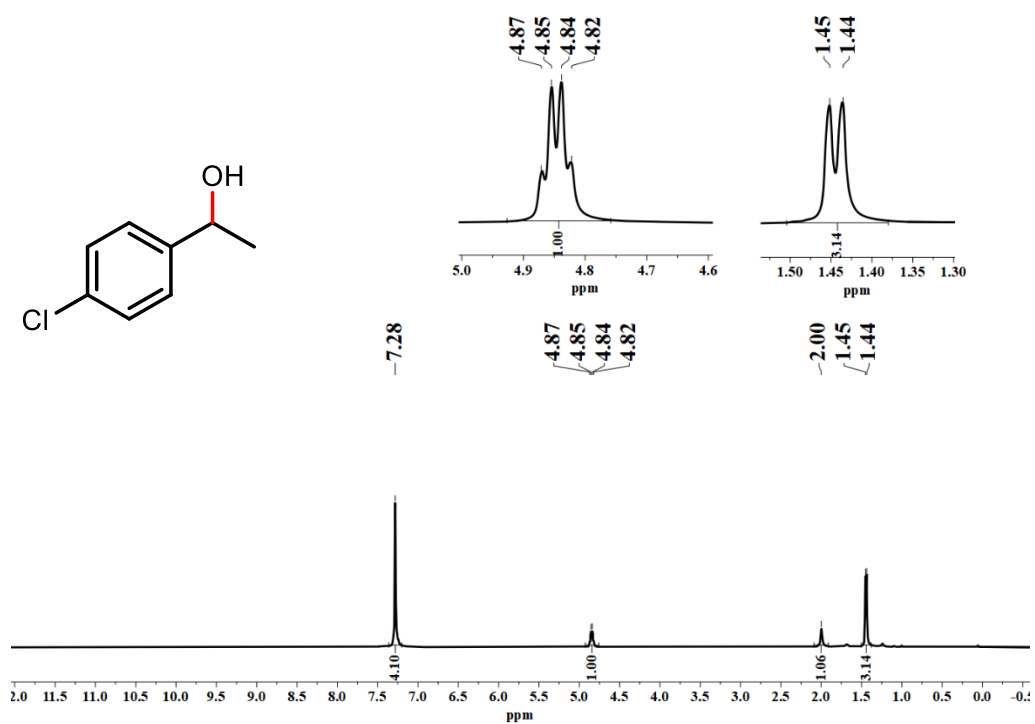

Fig. S85.  $^1\text{H}$  NMR spectrum of **6b** in  $\text{CDCl}_3$  (400 MHz).

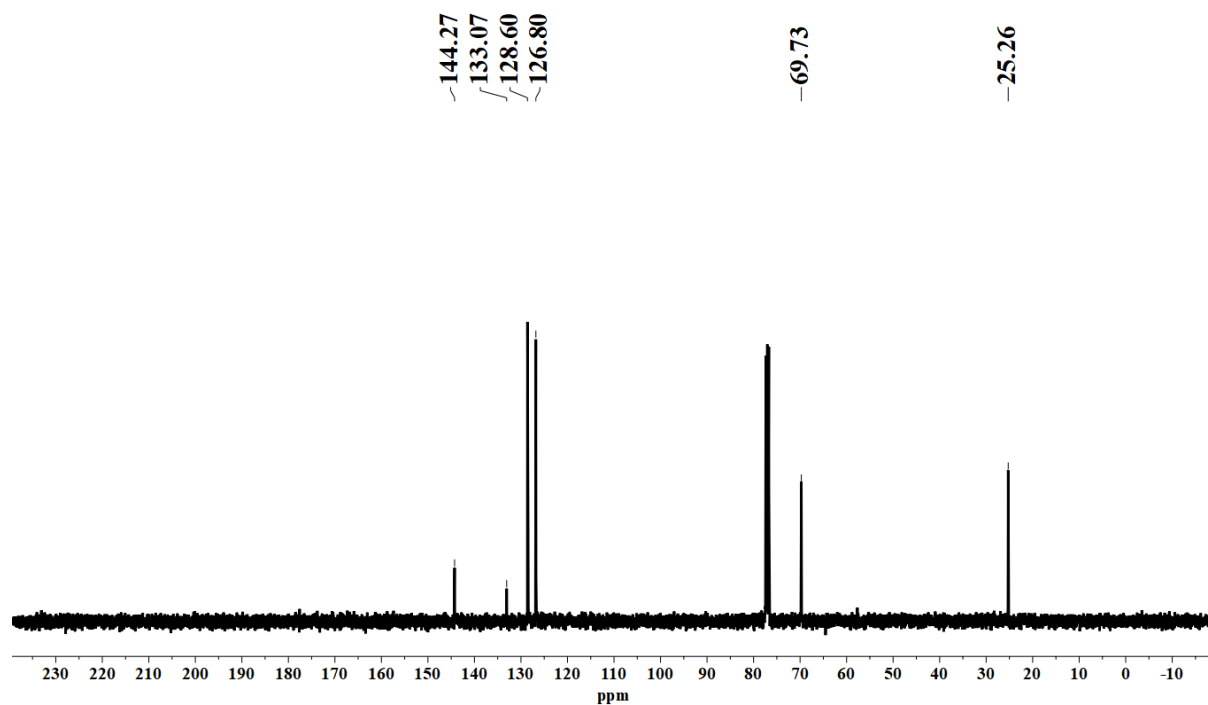

Fig. S86.  $^{13}\text{C}\{^1\text{H}\}$  NMR spectrum of **6b** in  $\text{CDCl}_3$  (101 MHz).



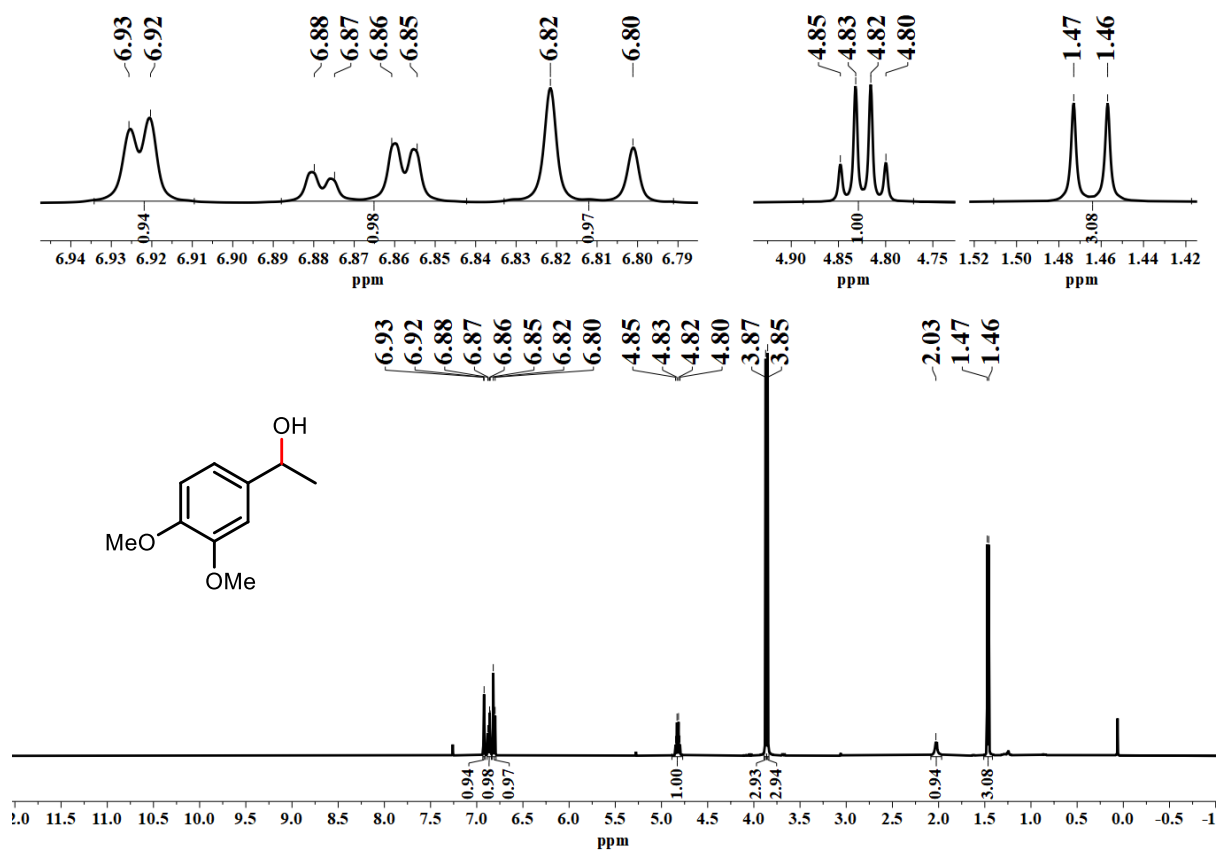

**Fig. S87.** <sup>1</sup>H NMR spectrum of **7b** in CDCl<sub>3</sub> (400 MHz).

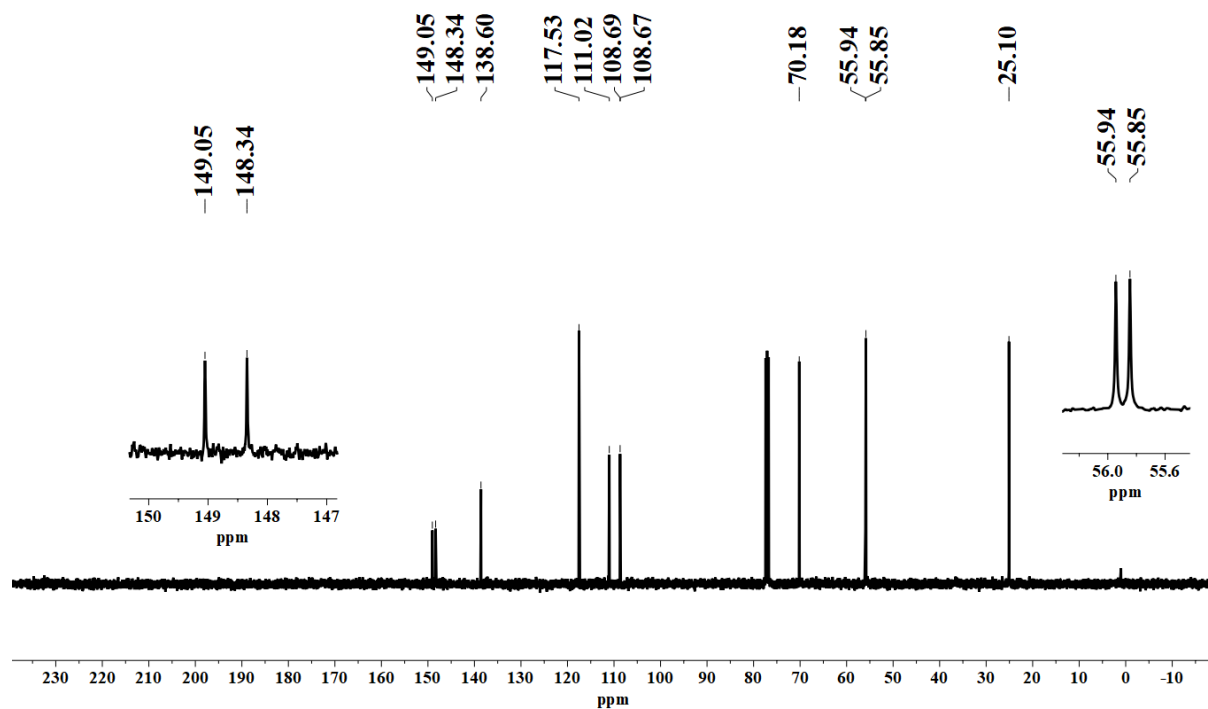

**Fig. S88.** <sup>13</sup>C {<sup>1</sup>H} NMR spectrum of **7b** in CDCl<sub>3</sub> (101 MHz).

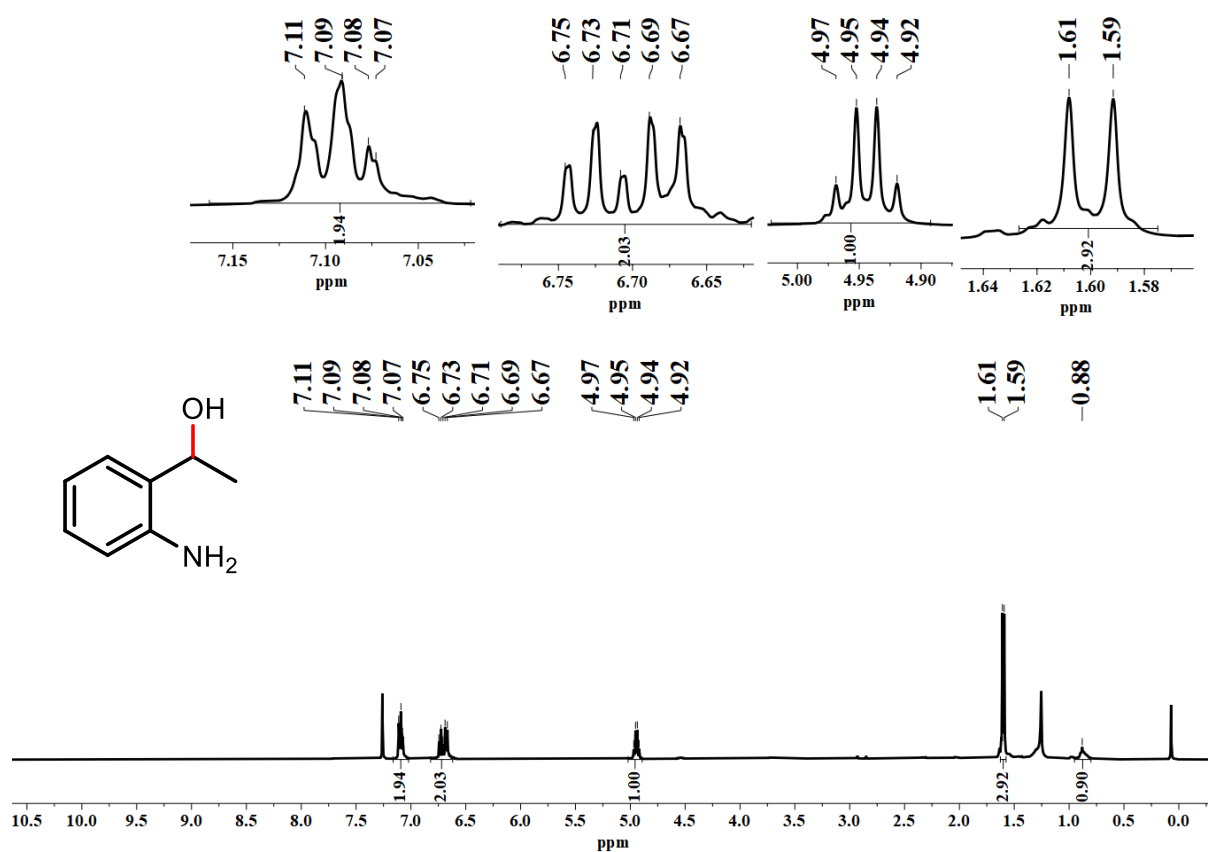

Fig. S89. <sup>1</sup>H NMR spectrum of **8b** in CDCl<sub>3</sub> (400 MHz).

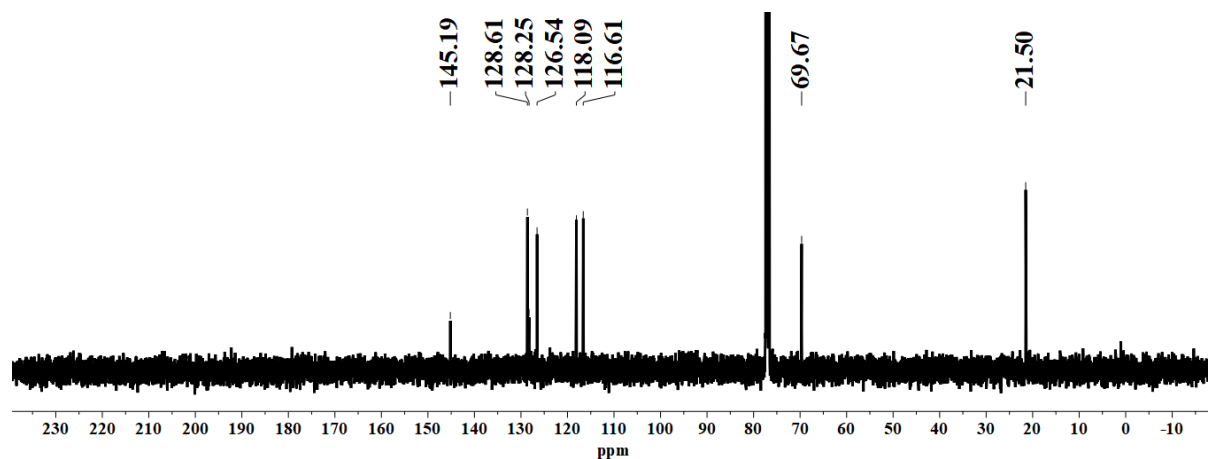

Fig. S90. <sup>13</sup>C {<sup>1</sup>H} NMR spectrum of **8b** in CDCl<sub>3</sub> (101 MHz).

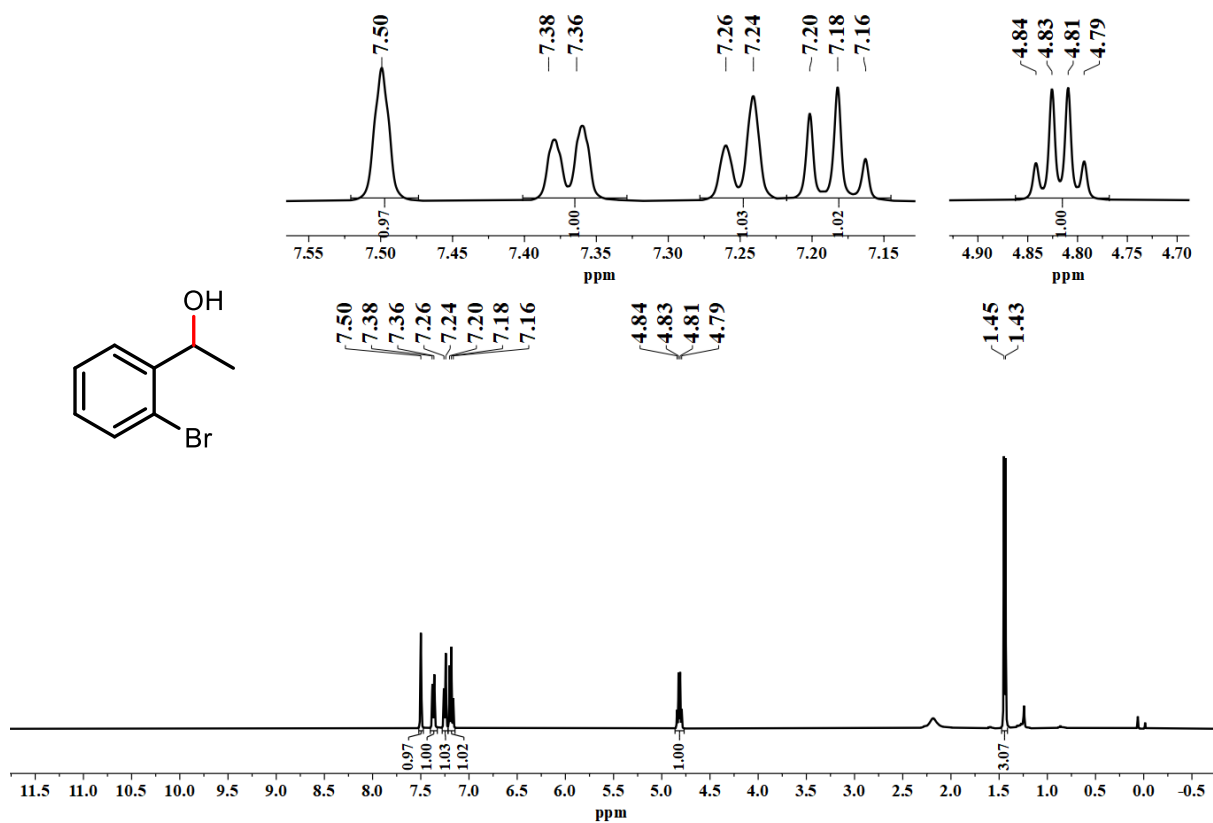

**Fig. S91.**  $^1\text{H}$  NMR spectrum of **9b** in  $\text{CDCl}_3$  (400 MHz).

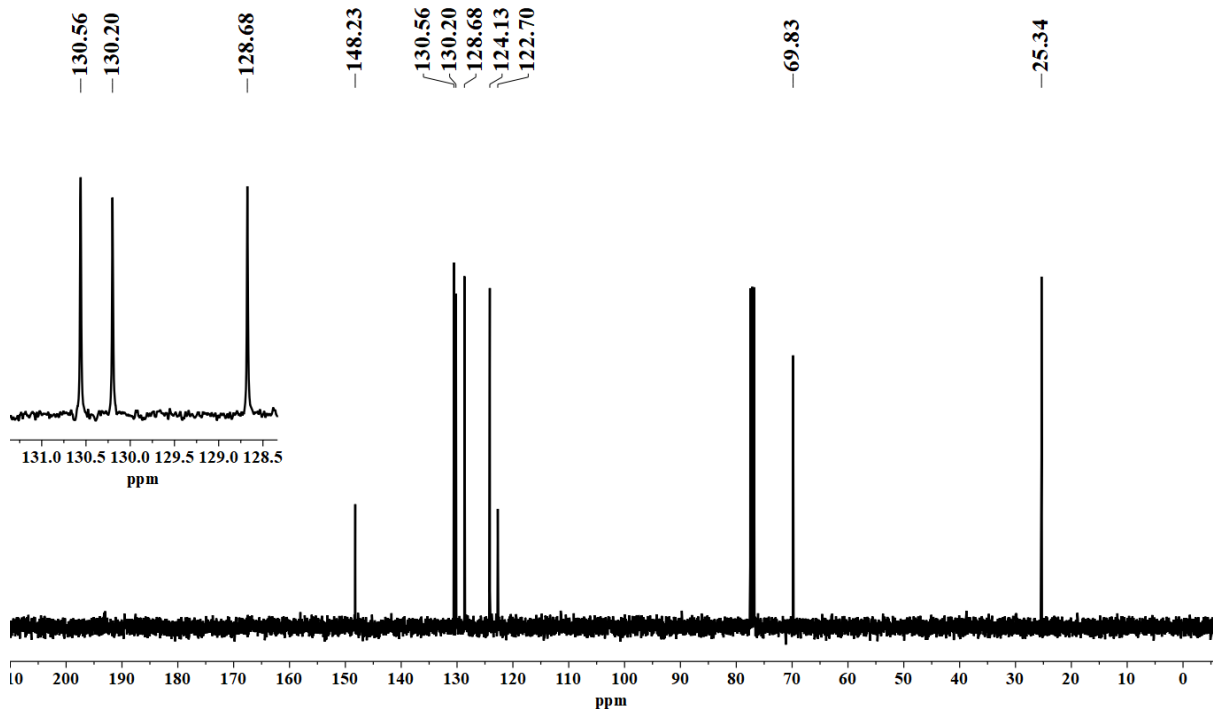

**Fig. S92.**  $^{13}\text{C}\{^1\text{H}\}$  NMR spectrum of **9b** in  $\text{CDCl}_3$  (101 MHz).

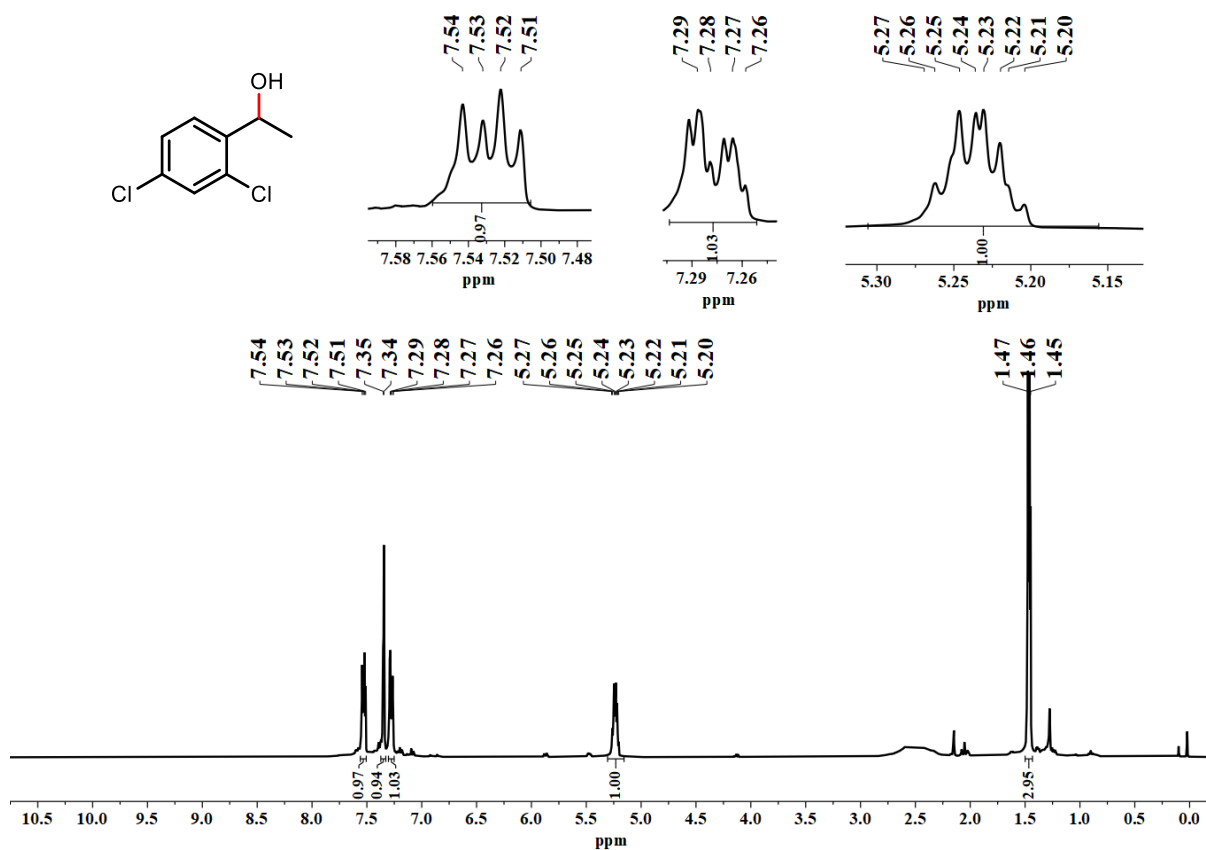

**Fig. S93.**  $^1\text{H}$  NMR spectrum of **10b** in  $\text{CDCl}_3$  (400 MHz).

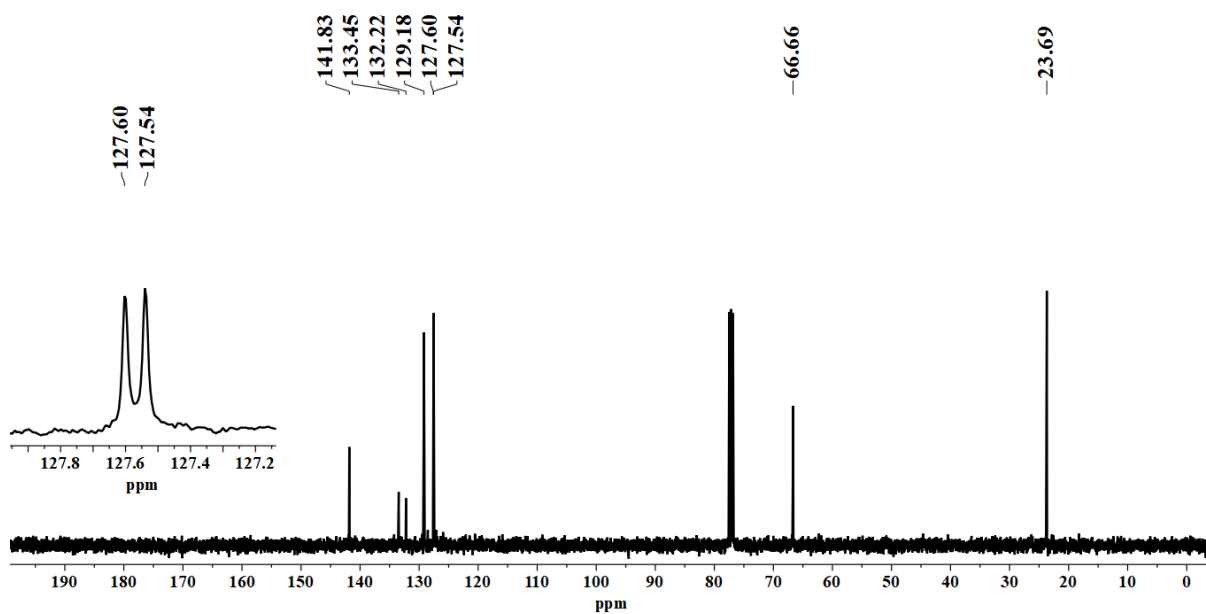

**Fig. S94.**  $^{13}\text{C}$   $\{^1\text{H}\}$  NMR spectrum of **10** in  $\text{CDCl}_3$  (101 MHz).

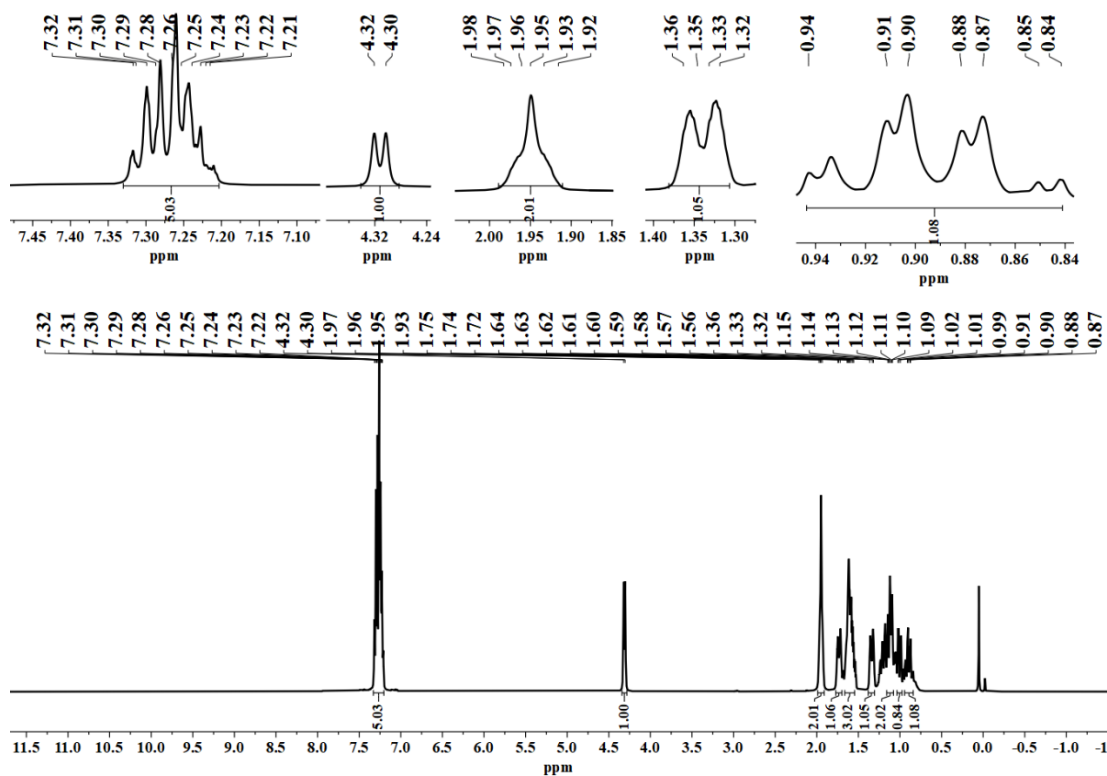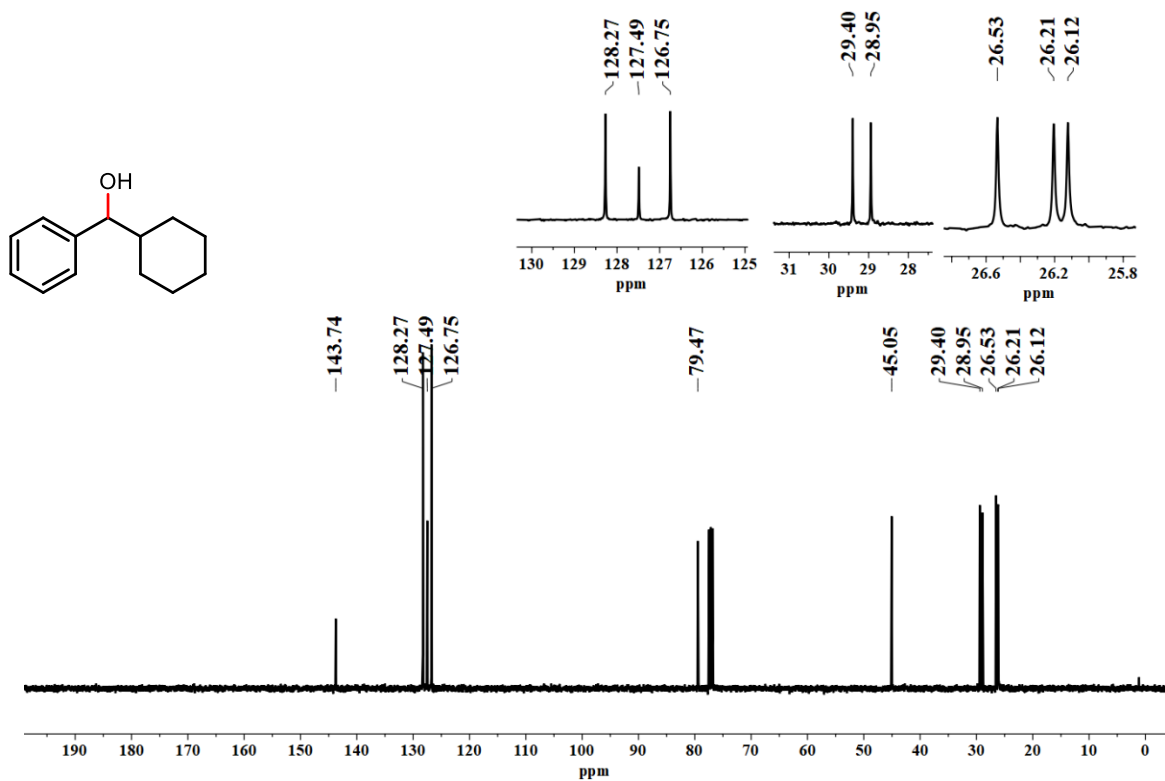

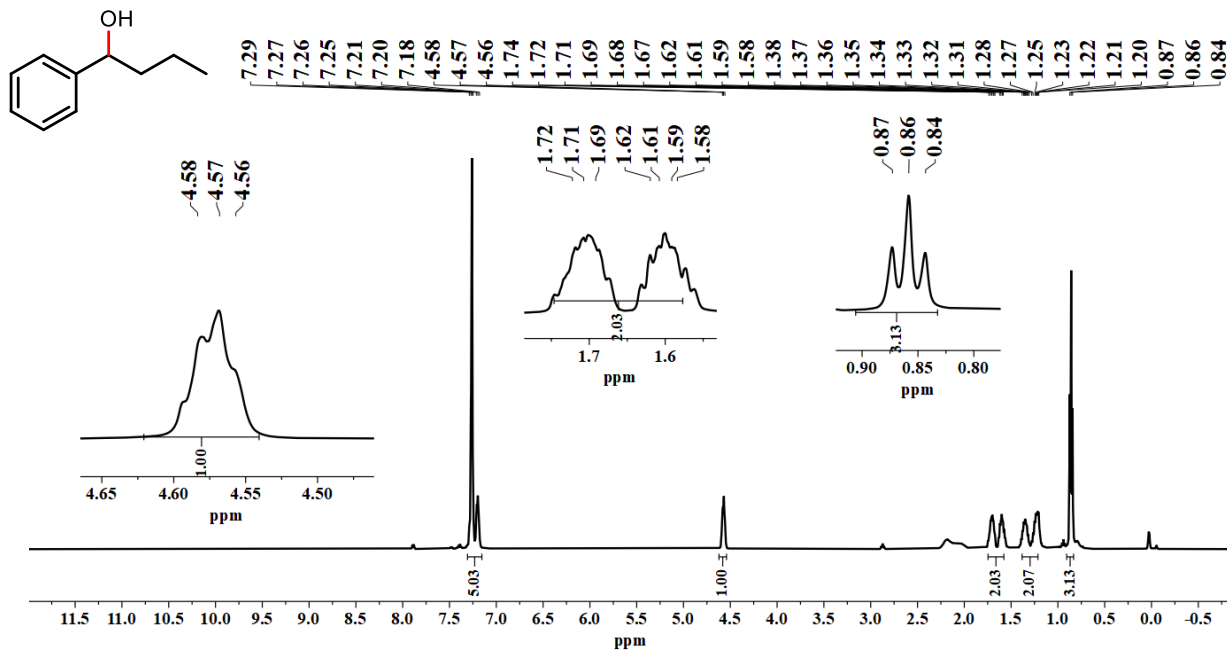

**Fig. S97.** <sup>1</sup>H NMR spectrum of **12b** in CDCl<sub>3</sub> (500 MHz).

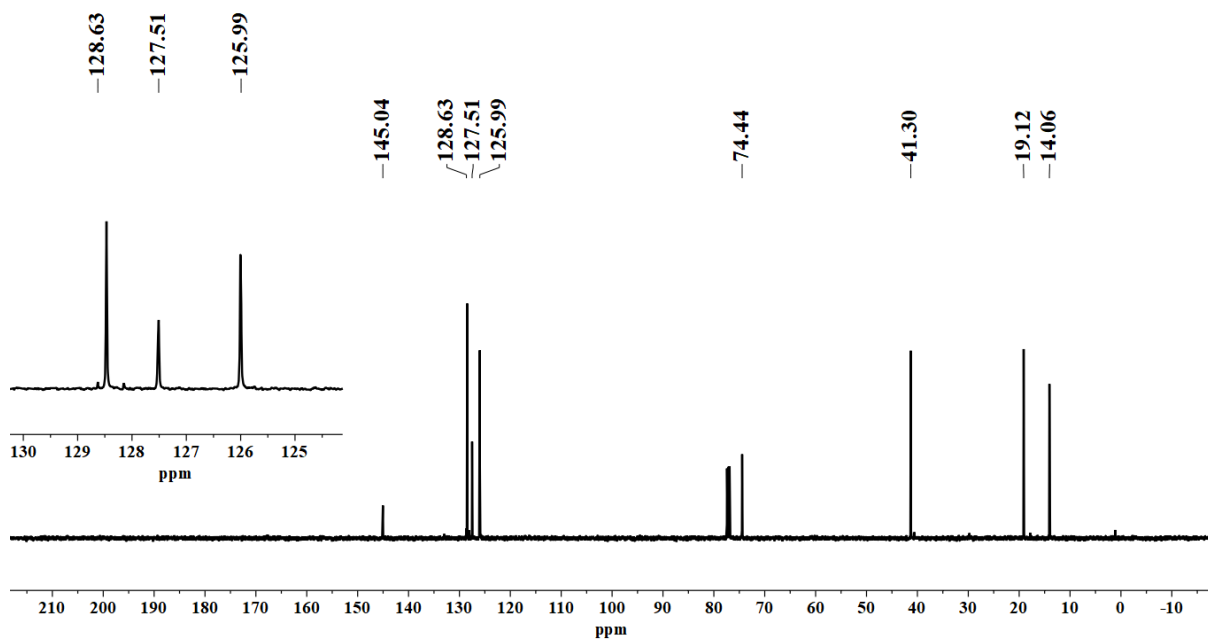

**Fig. S98.** <sup>13</sup>C{<sup>1</sup>H} NMR spectrum of **12b** in CDCl<sub>3</sub> (126 MHz).

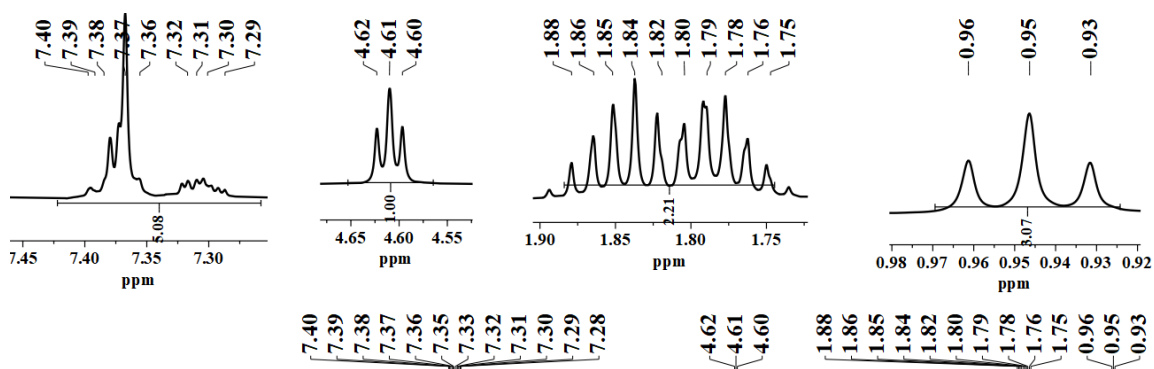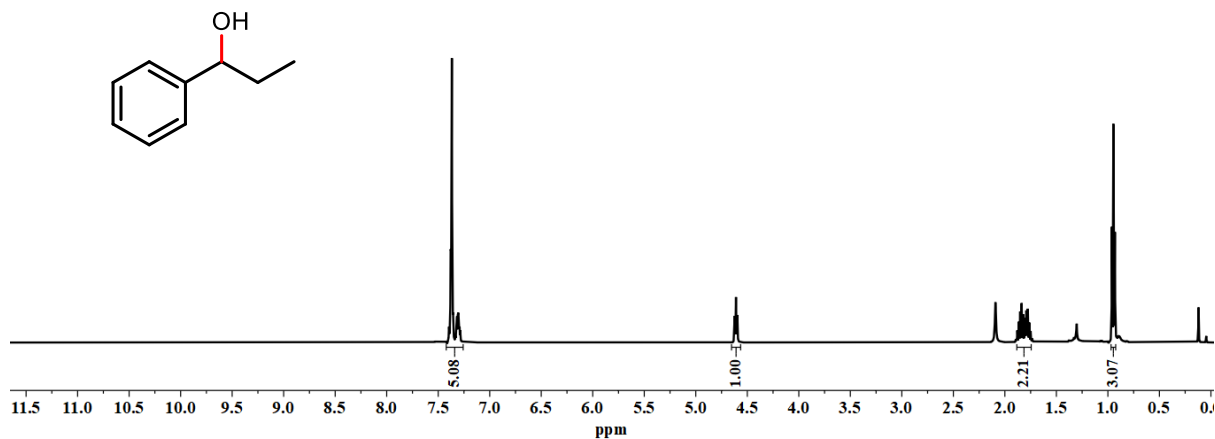

**Fig. S99.**  $^1\text{H}$  NMR spectrum of **13b** in  $\text{CDCl}_3$  (500 MHz).

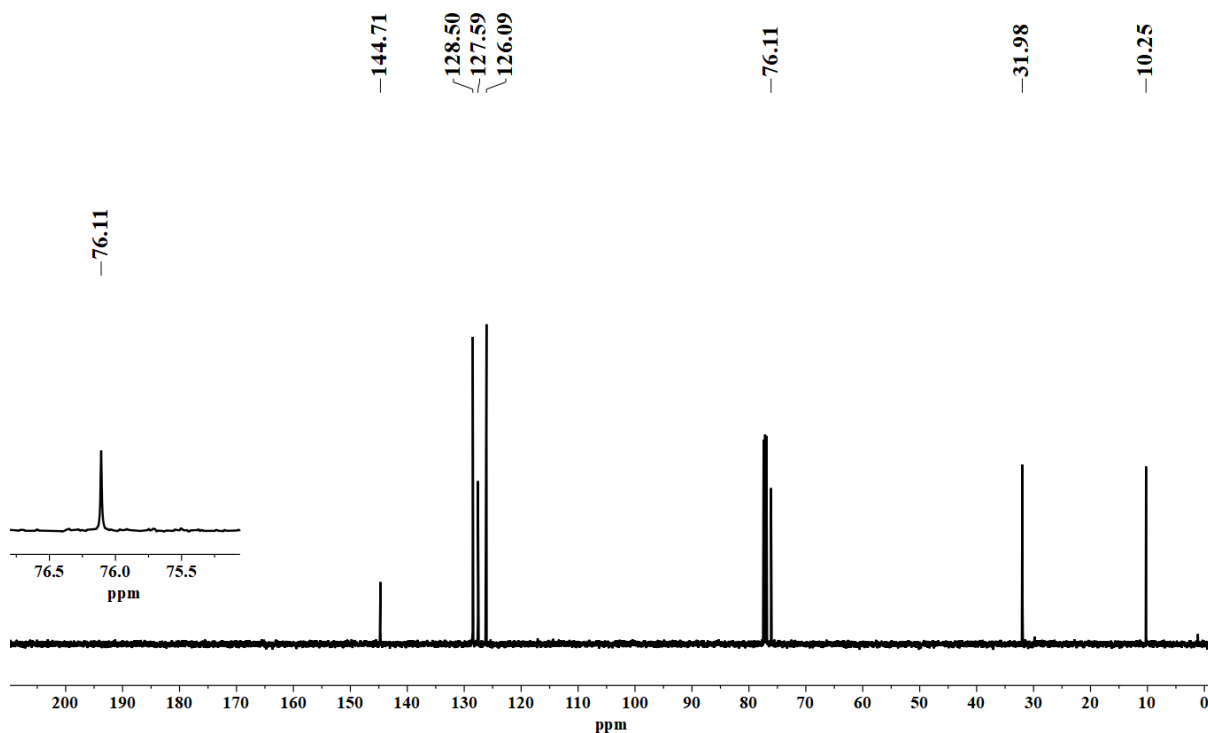

**Fig. S100.**  $^{13}\text{C}\{^1\text{H}\}$  NMR spectrum of **13b** in  $\text{CDCl}_3$  (126 MHz).

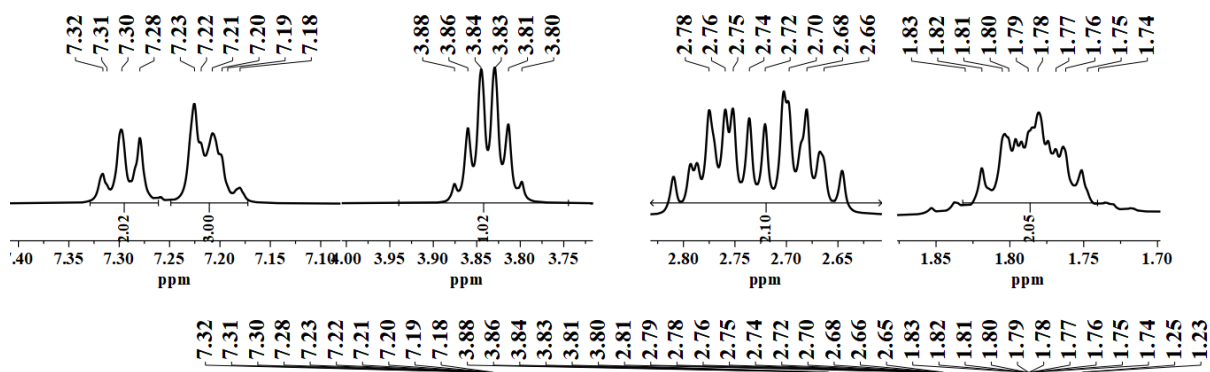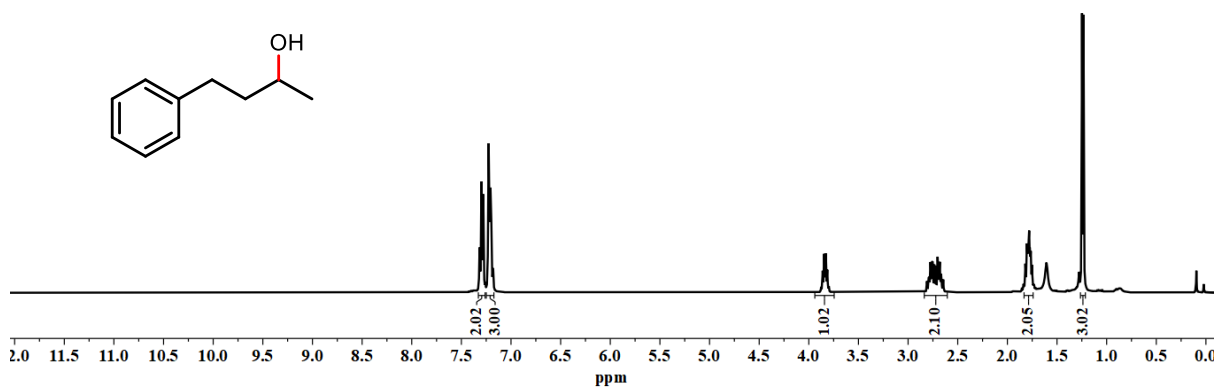

Fig. S101. <sup>1</sup>H NMR spectrum of **14b** in CDCl<sub>3</sub> (400 MHz).

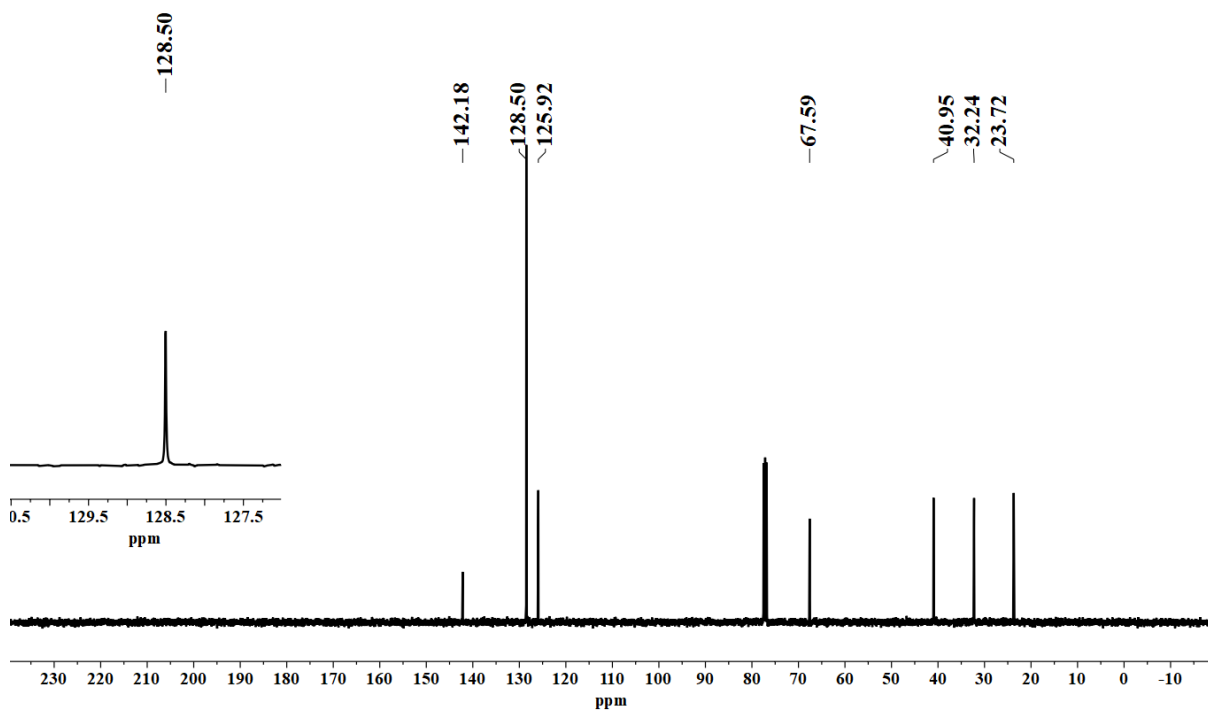

Fig. S102. <sup>13</sup>C{<sup>1</sup>H} NMR spectrum of **14b** in CDCl<sub>3</sub> (101 MHz).



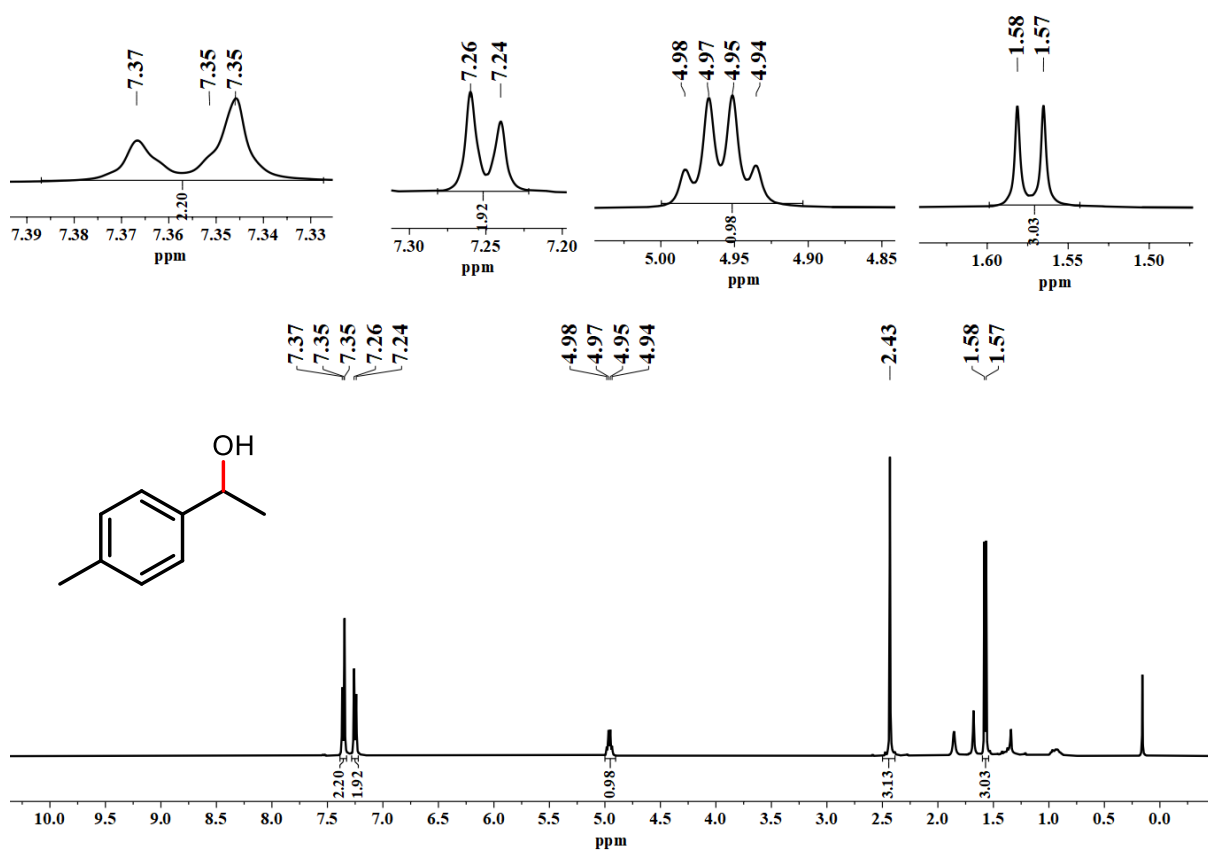

**Fig. S103.**  $^1\text{H}$  NMR spectrum of **15b** in  $\text{CDCl}_3$  (400 MHz).

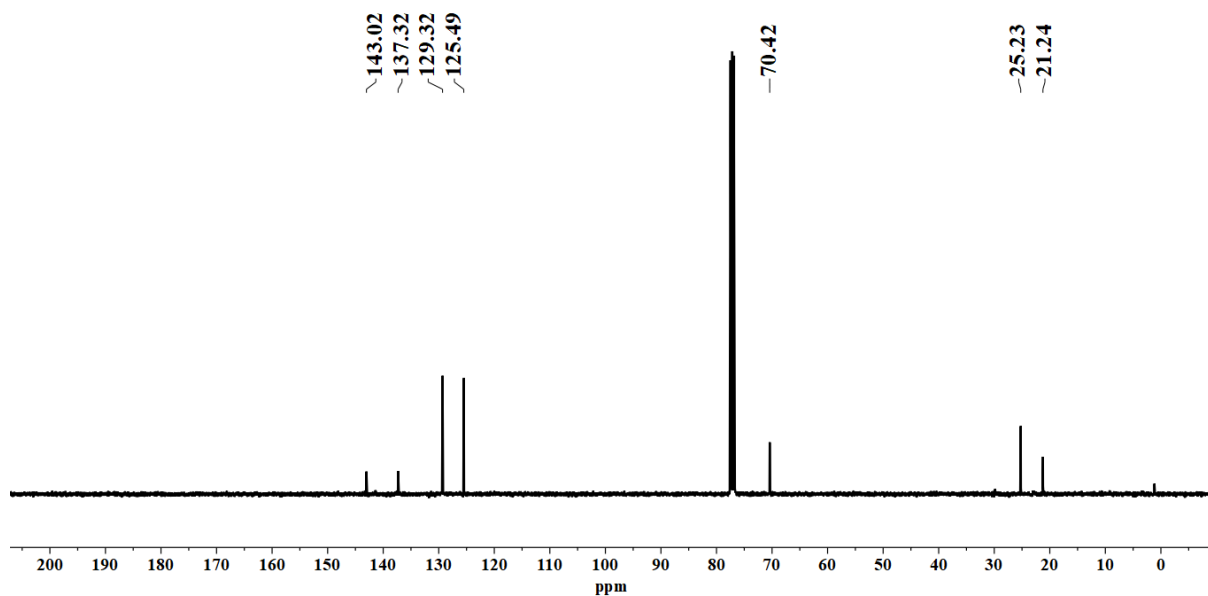

**Fig. S104.**  $^{13}\text{C}\{^1\text{H}\}$  NMR spectrum of **15b** in  $\text{CDCl}_3$  (101 MHz).

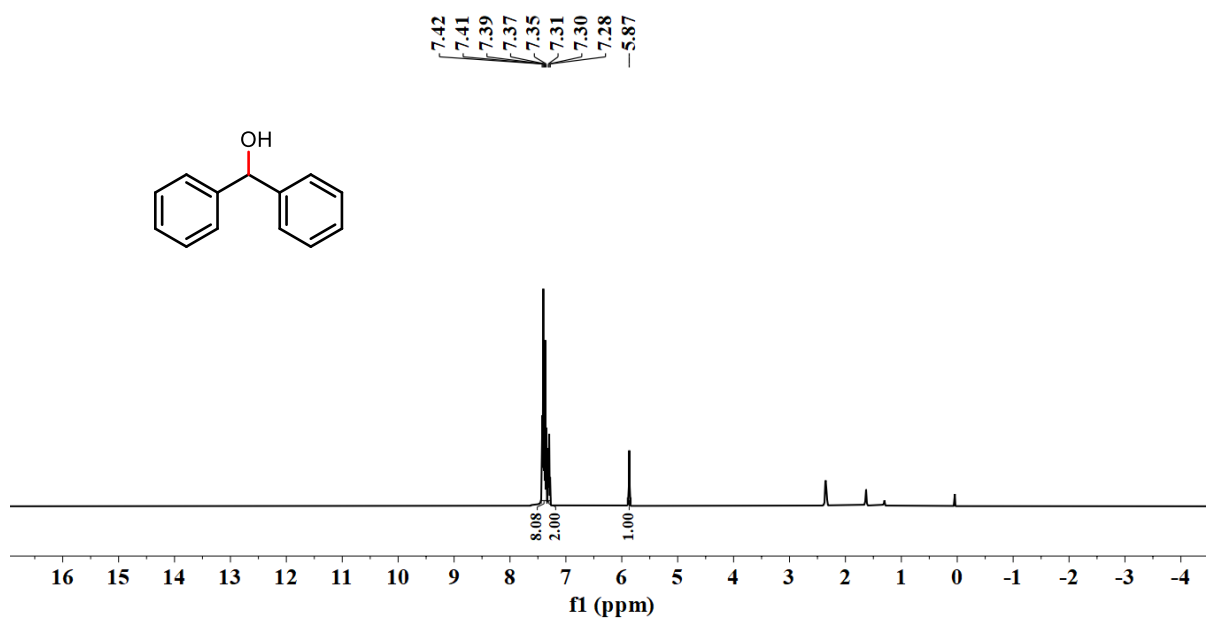

Fig. S105.  $^1\text{H}$  NMR spectrum of 16b in  $\text{CDCl}_3$  (400 MHz).

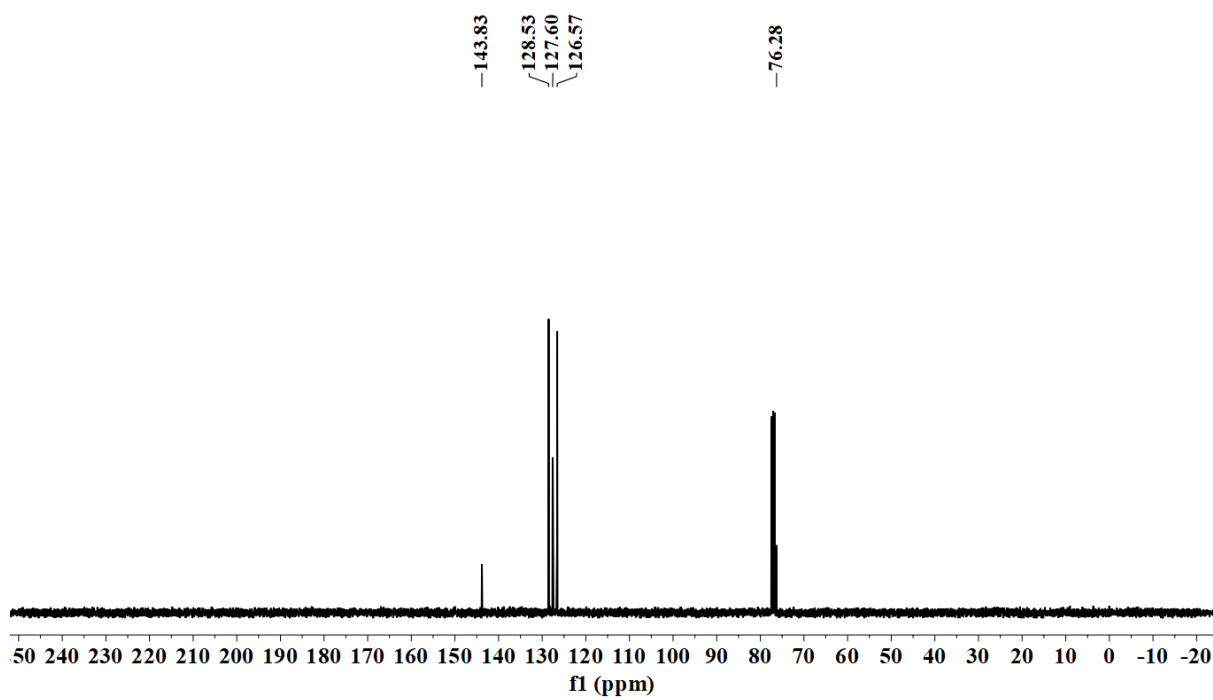

Fig. S106.  $^{13}\text{C}\{^1\text{H}\}$  NMR spectrum of 16b in  $\text{CDCl}_3$  (101 MHz).

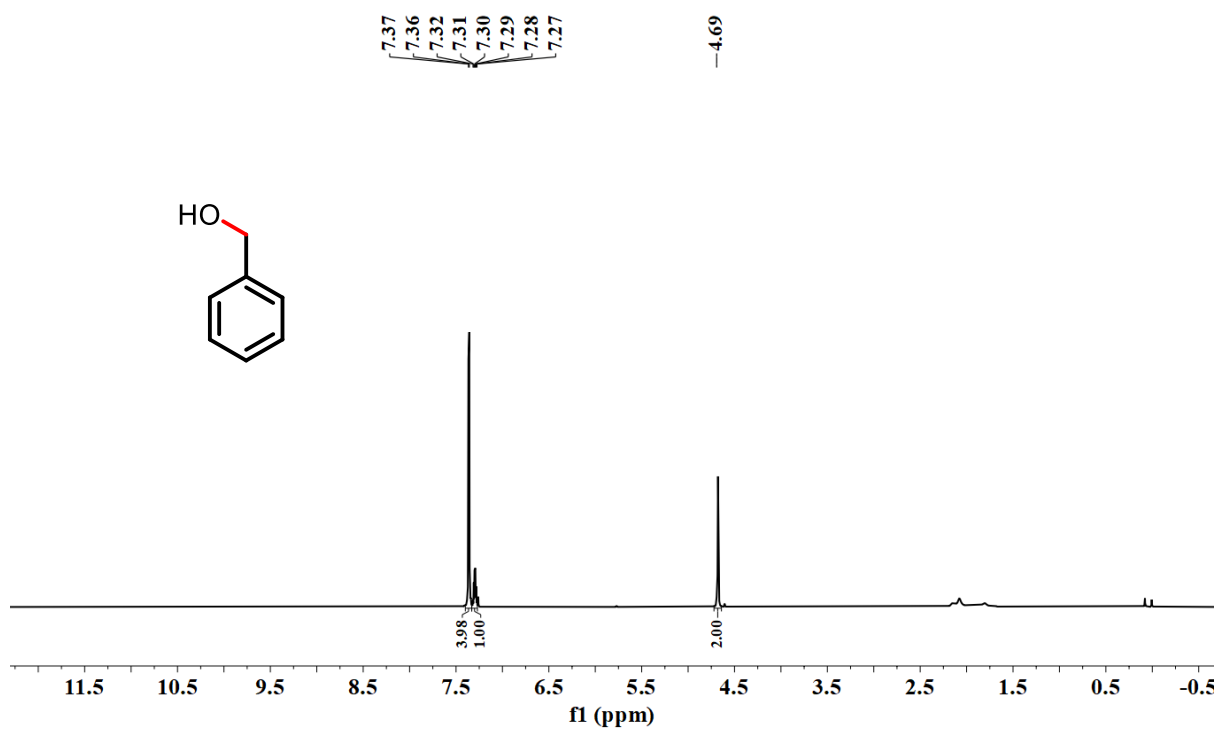

**Fig. S107.**  $^1\text{H}$  NMR spectrum of **1c** in  $\text{CDCl}_3$  (500 MHz).

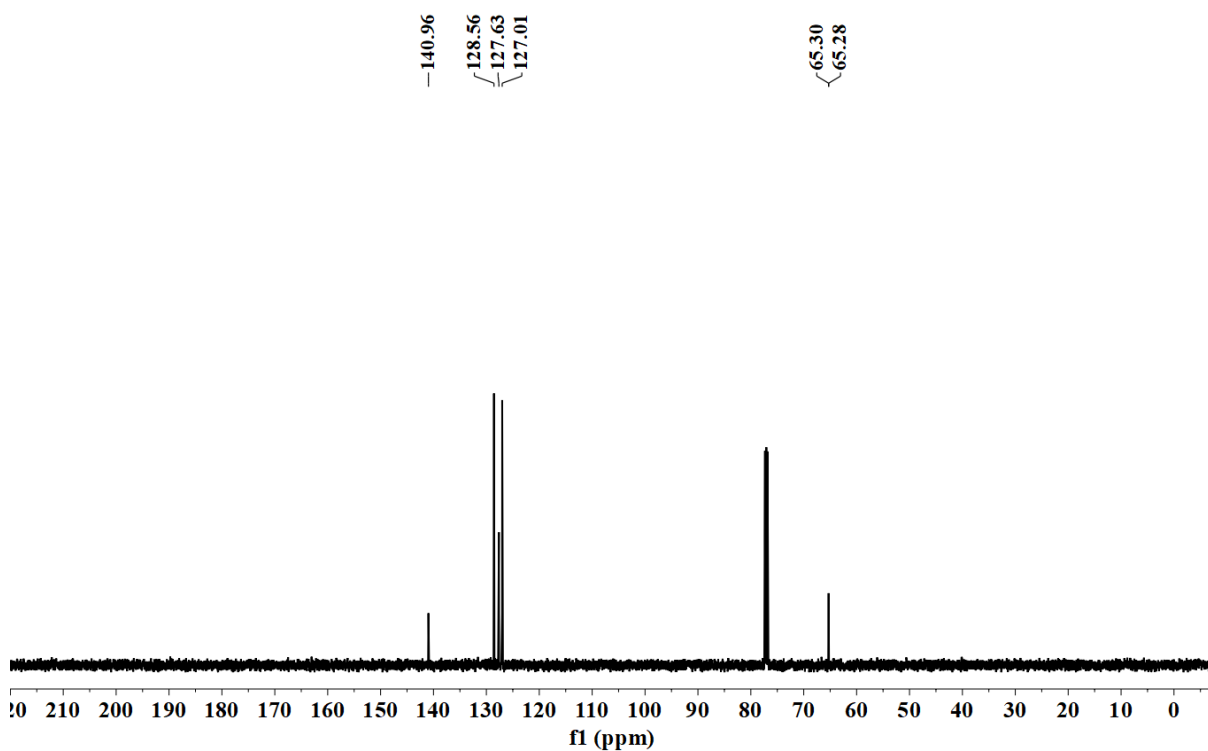

**Fig. S108.**  $^{13}\text{C}\{^1\text{H}\}$  NMR spectrum of **1c** in  $\text{CDCl}_3$  (126 MHz).

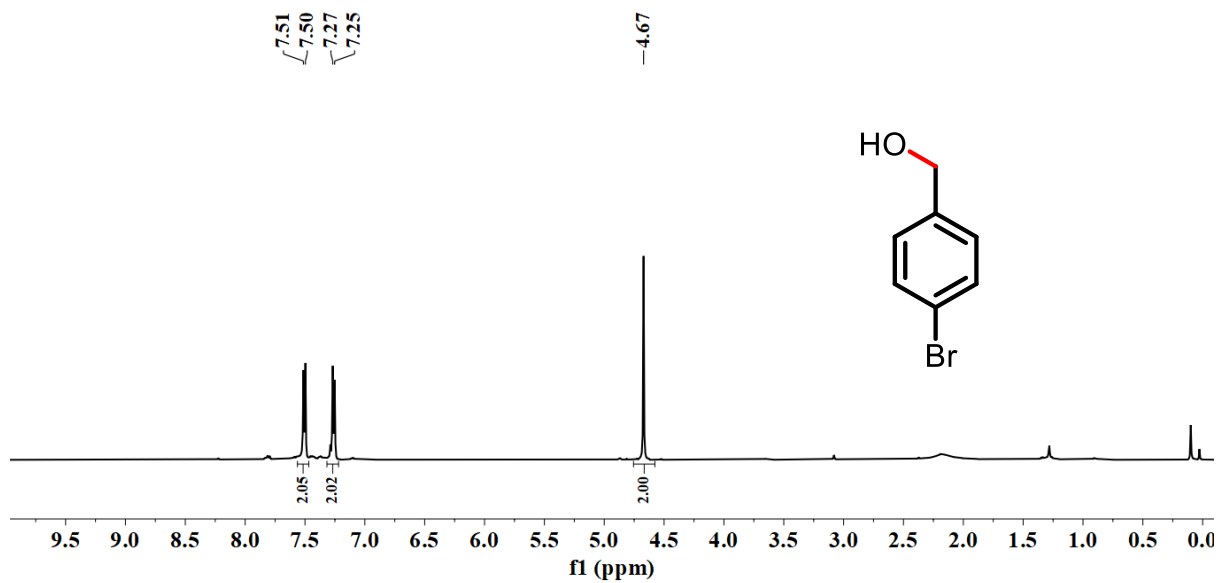

**Fig. S109.**  $^1\text{H}$  NMR spectrum of **2c** in  $\text{CDCl}_3$  (500 MHz).

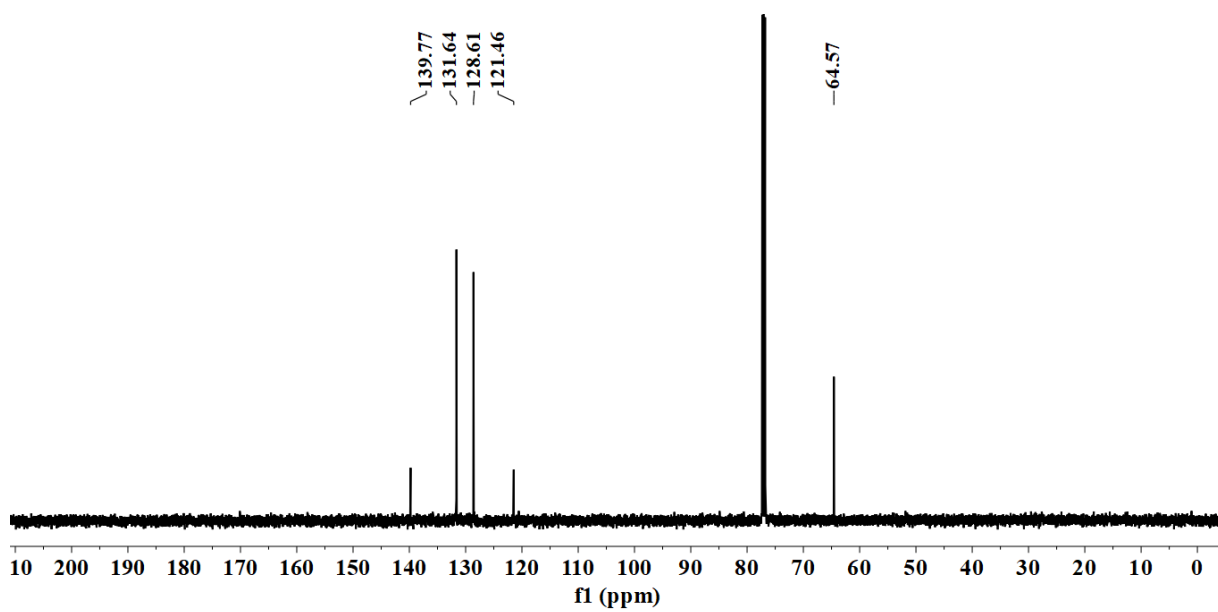

**Fig. S110.**  $^{13}\text{C}\{^1\text{H}\}$  NMR spectrum of **2c** in  $\text{CDCl}_3$  (126 MHz).

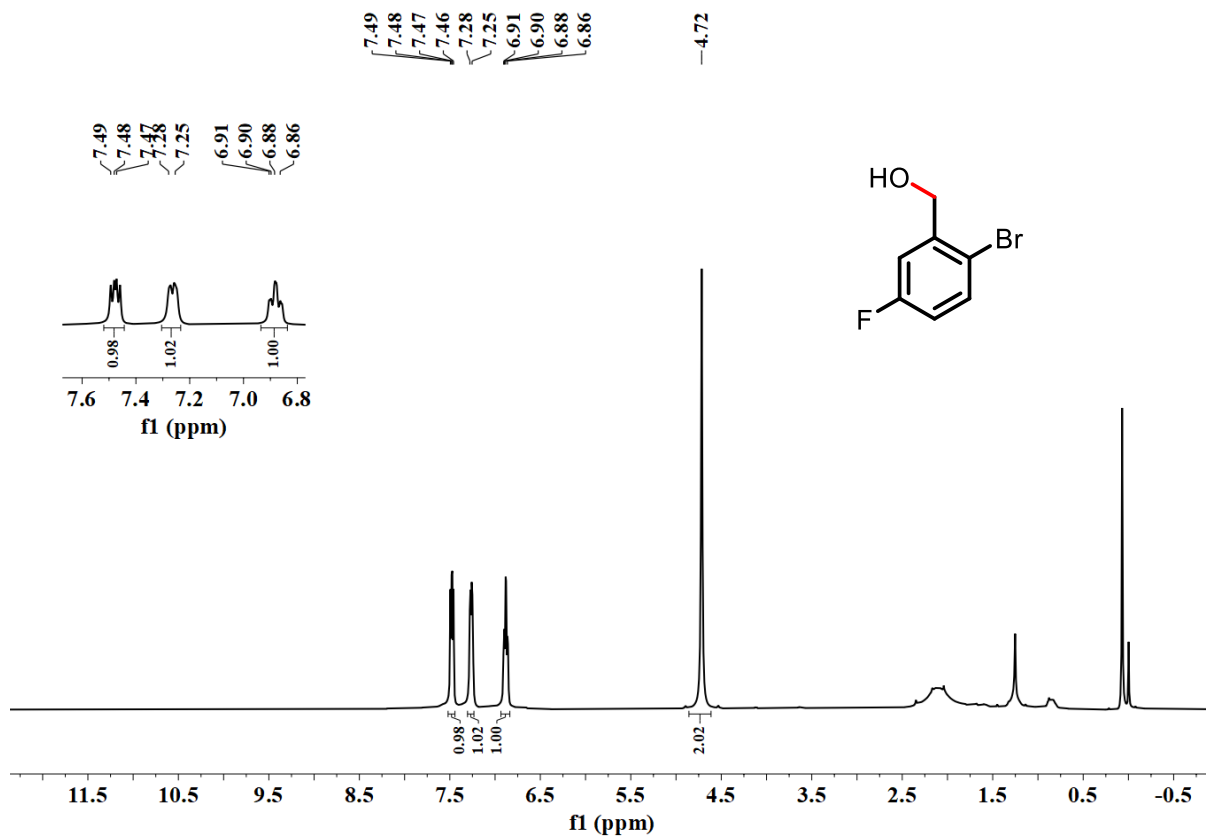

**Fig. S111.** <sup>1</sup>H NMR spectrum of **3c** in CDCl<sub>3</sub> (400 MHz).

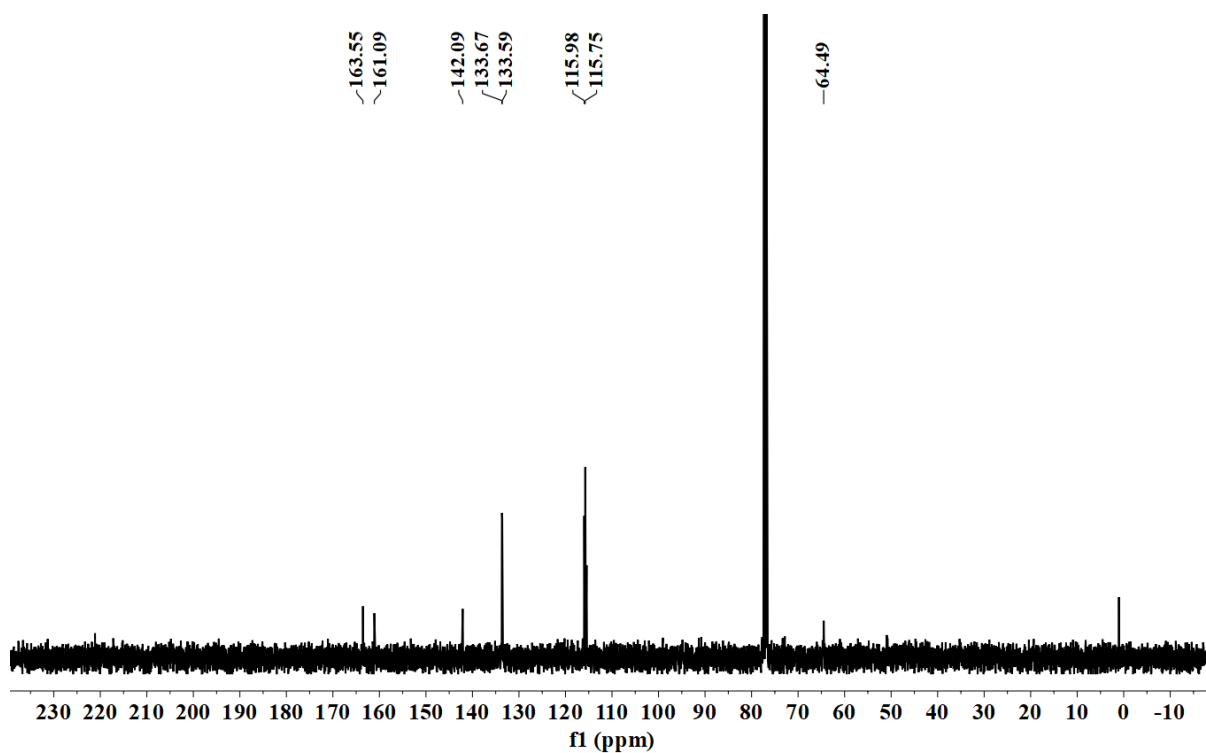

**Fig. S112.** <sup>13</sup>C{<sup>1</sup>H} NMR spectrum of **3c** in CDCl<sub>3</sub> (101 MHz).

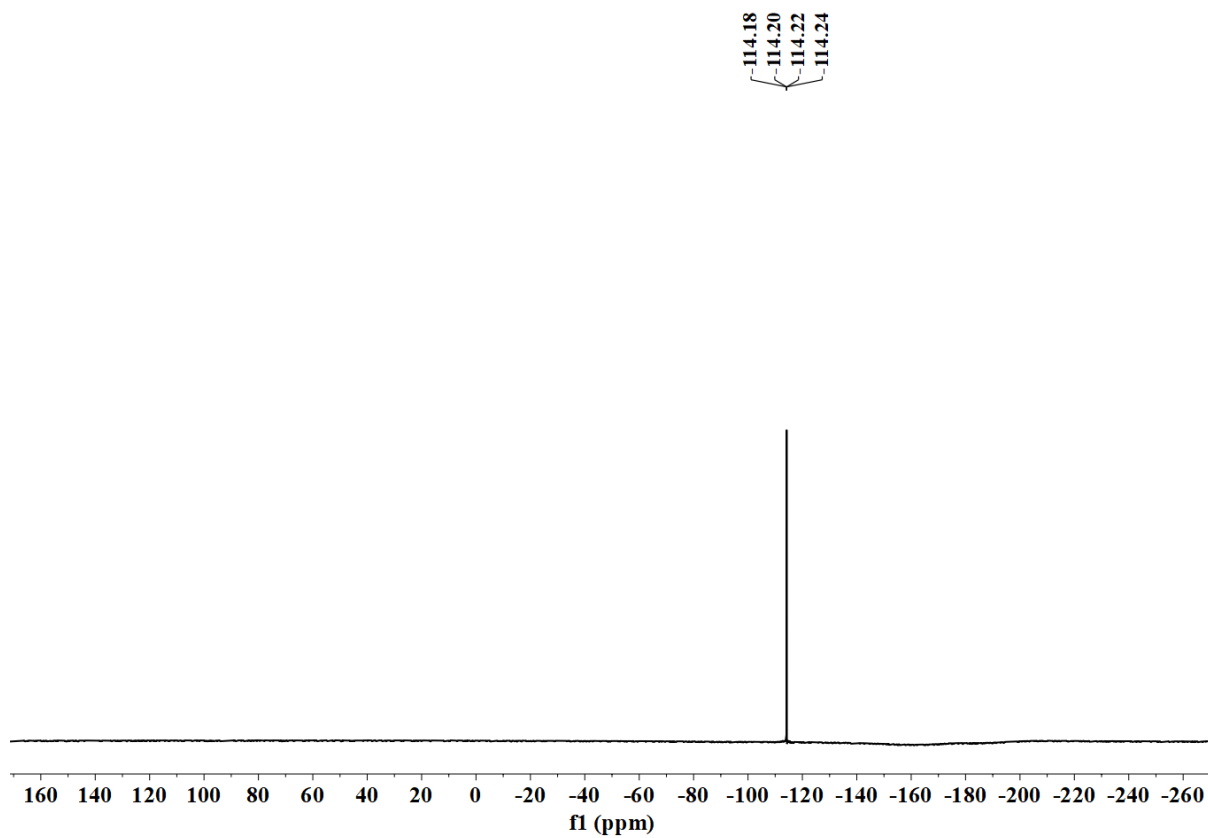

**Fig. S113.**  $^{19}\text{F}\{^1\text{H}\}$  NMR spectrum of **3c** in  $\text{CDCl}_3$  (376 MHz).

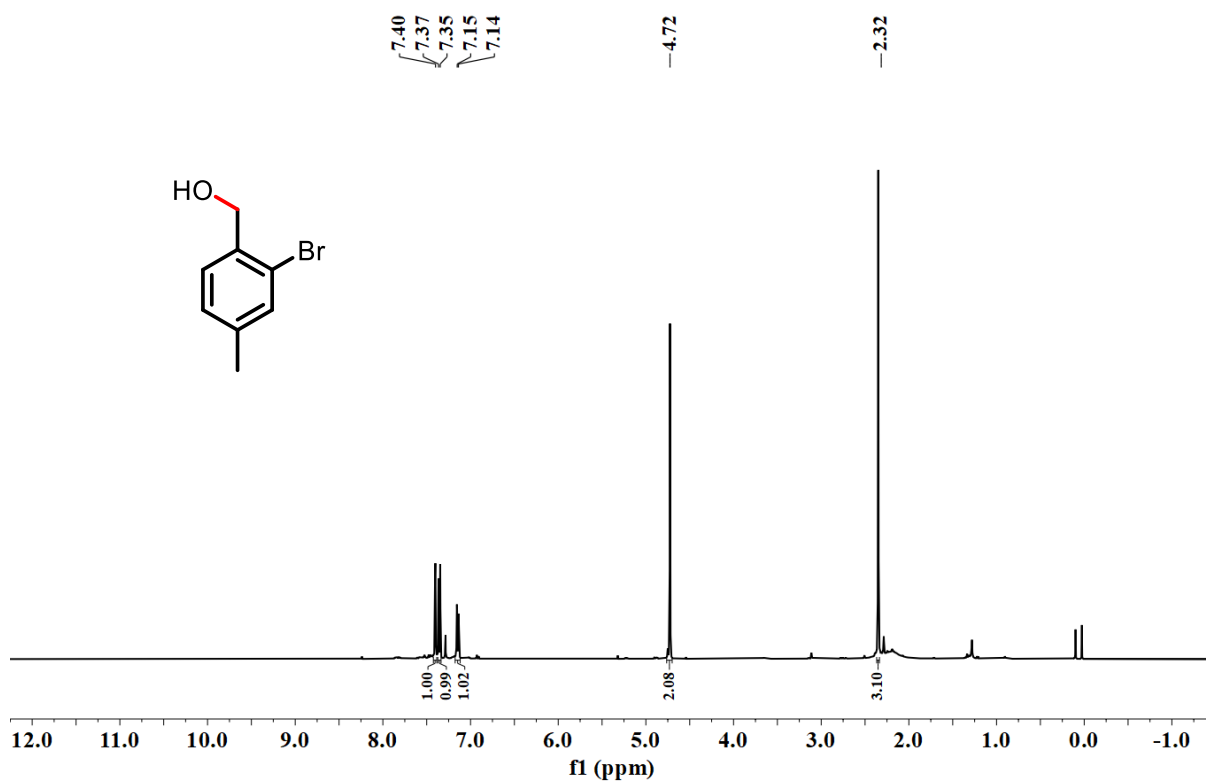

Fig. S114.  $^1\text{H}$  NMR spectrum of 4c in  $\text{CDCl}_3$  (400 MHz).

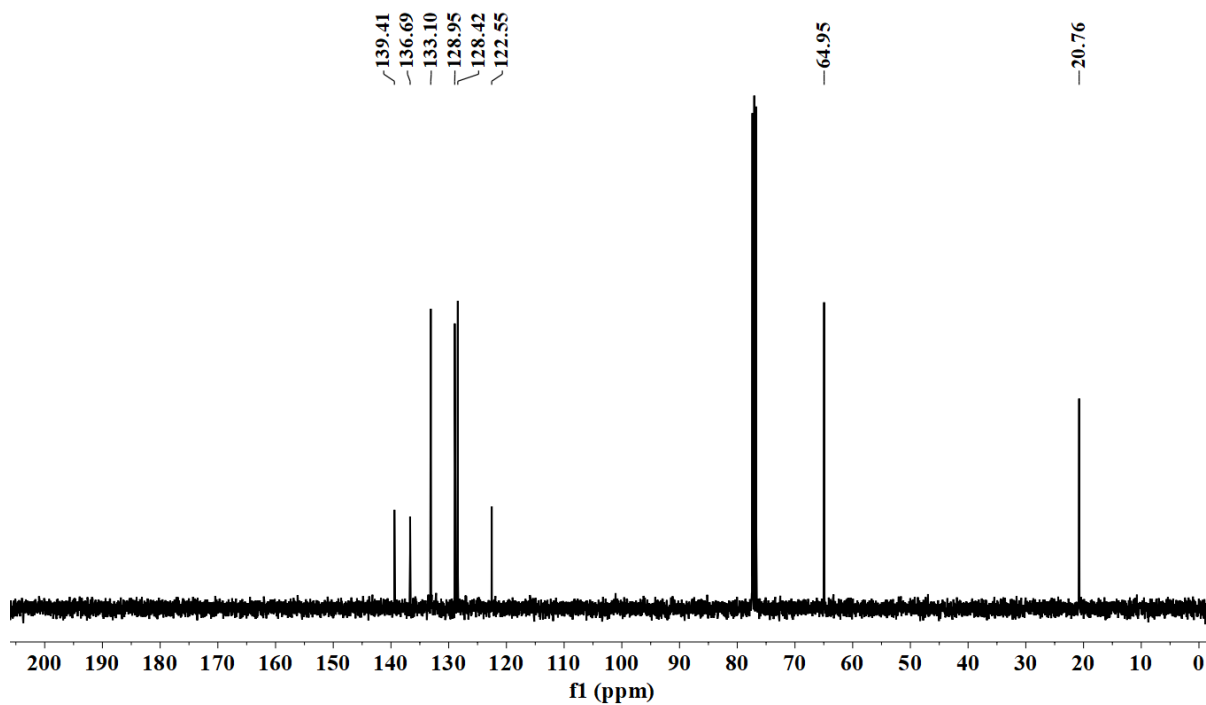

Fig. S115.  $^{13}\text{C}\{^1\text{H}\}$  NMR spectrum of 4c in  $\text{CDCl}_3$  (101 MHz).

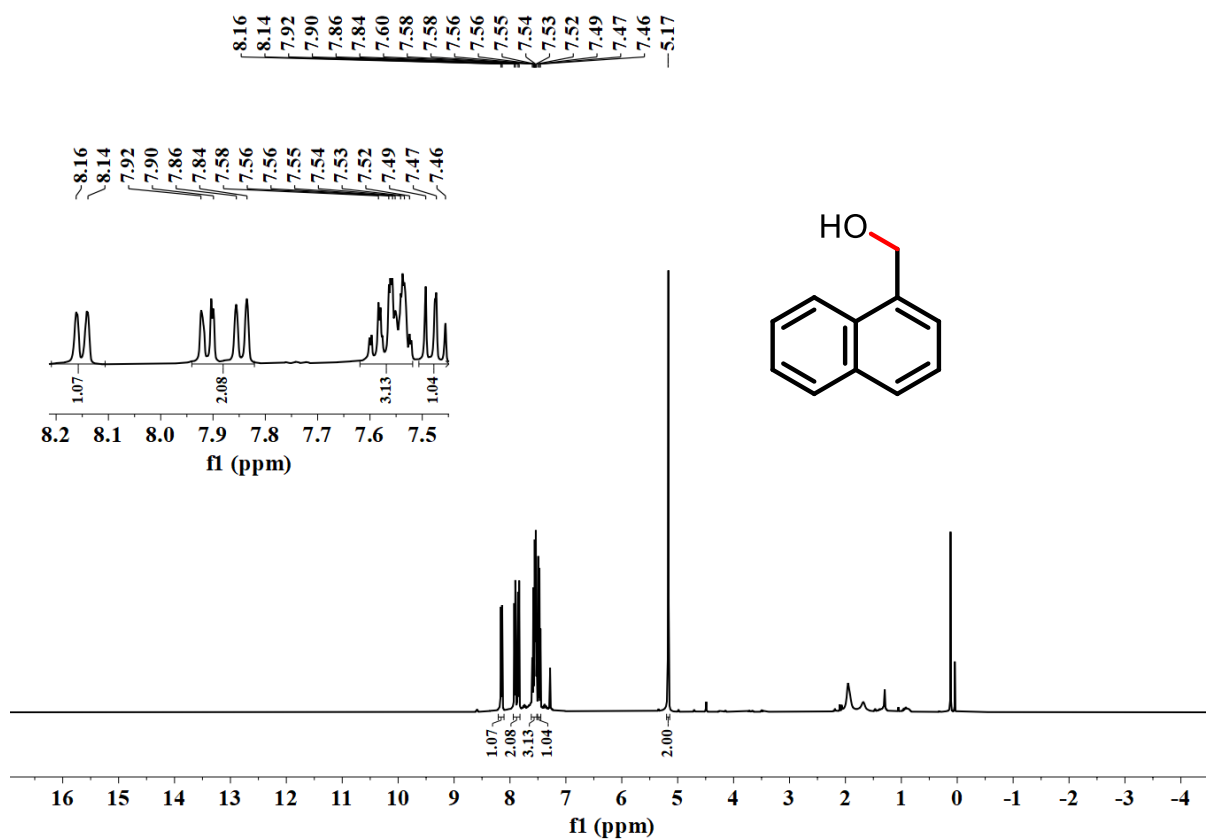

Fig. S116.  $^1\text{H}$  NMR spectrum of 5c in  $\text{CDCl}_3$  (400 MHz).

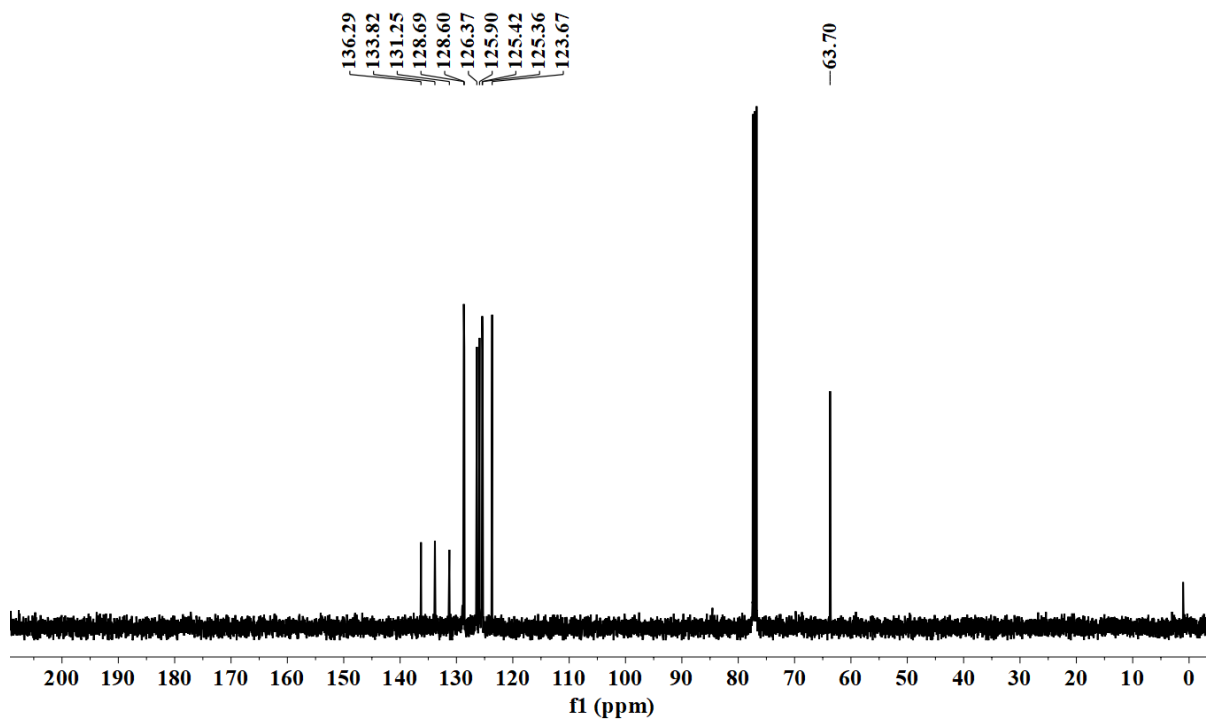

Fig. S117.  $^{13}\text{C}$   $\{^1\text{H}\}$  NMR spectrum of 5c in  $\text{CDCl}_3$  (101 MHz).



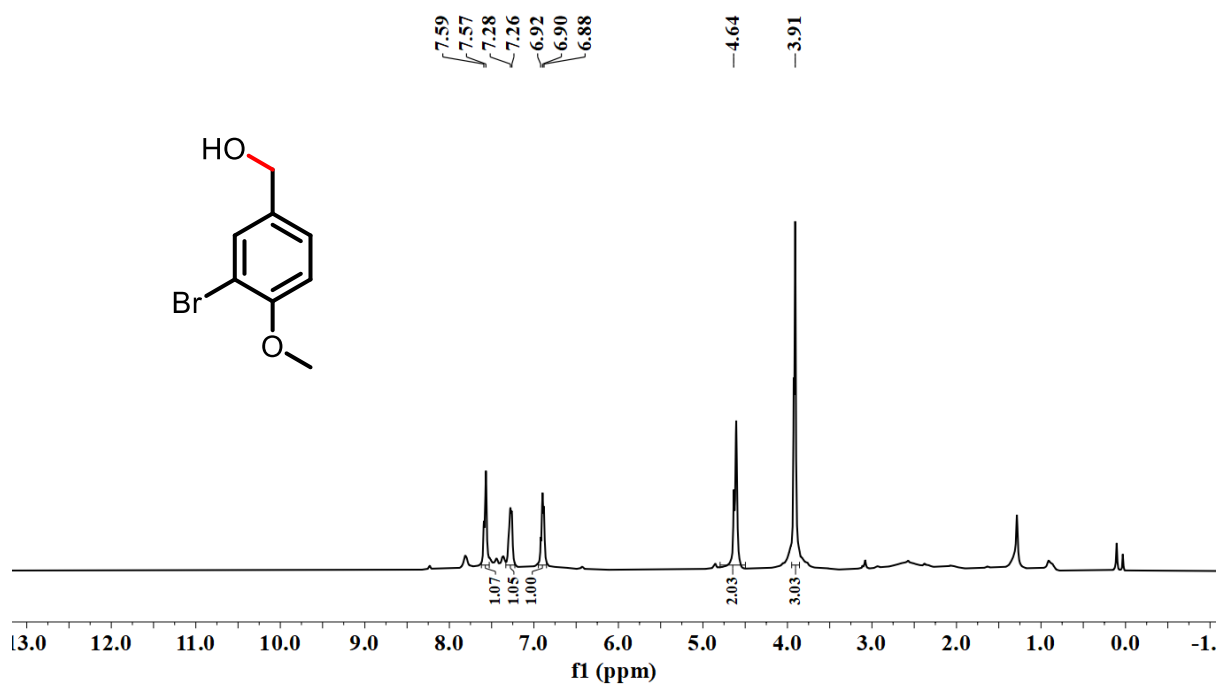

Fig. S118. <sup>1</sup>H NMR spectrum of 6c in CDCl<sub>3</sub> (500 MHz).

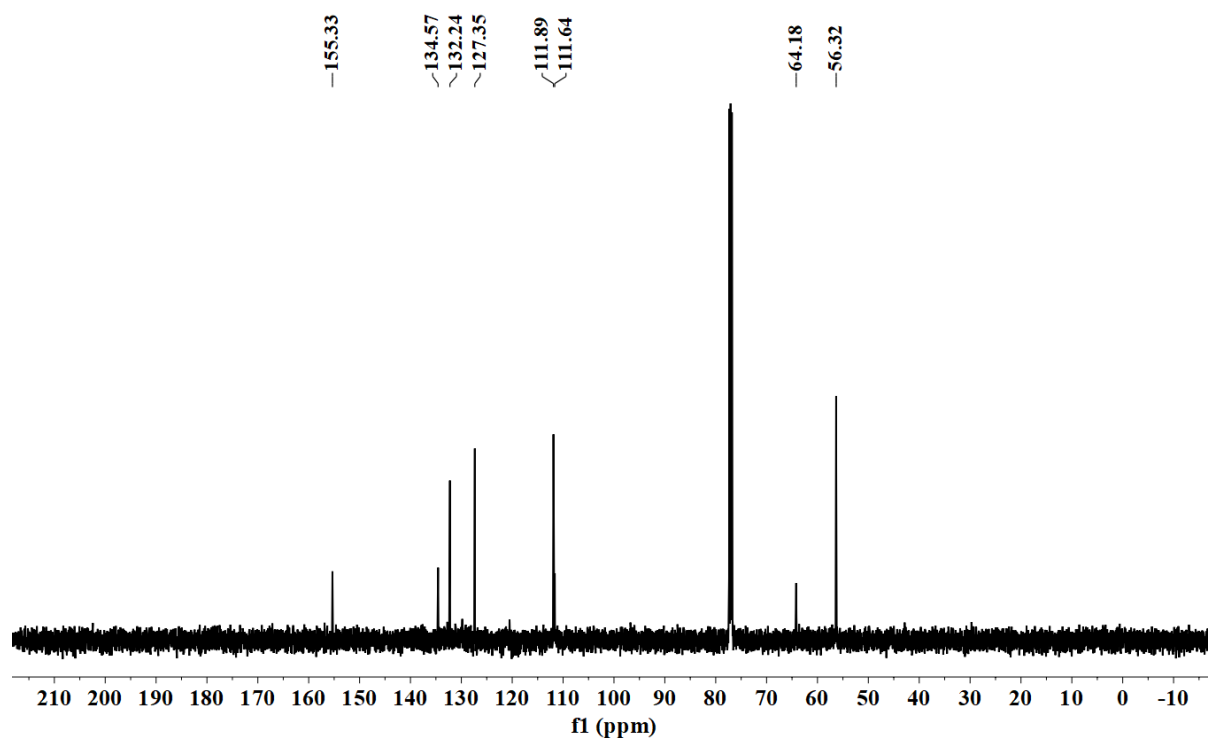

Fig. S119. <sup>13</sup>C{<sup>1</sup>H} NMR spectrum of 6c in CDCl<sub>3</sub> (126 MHz).

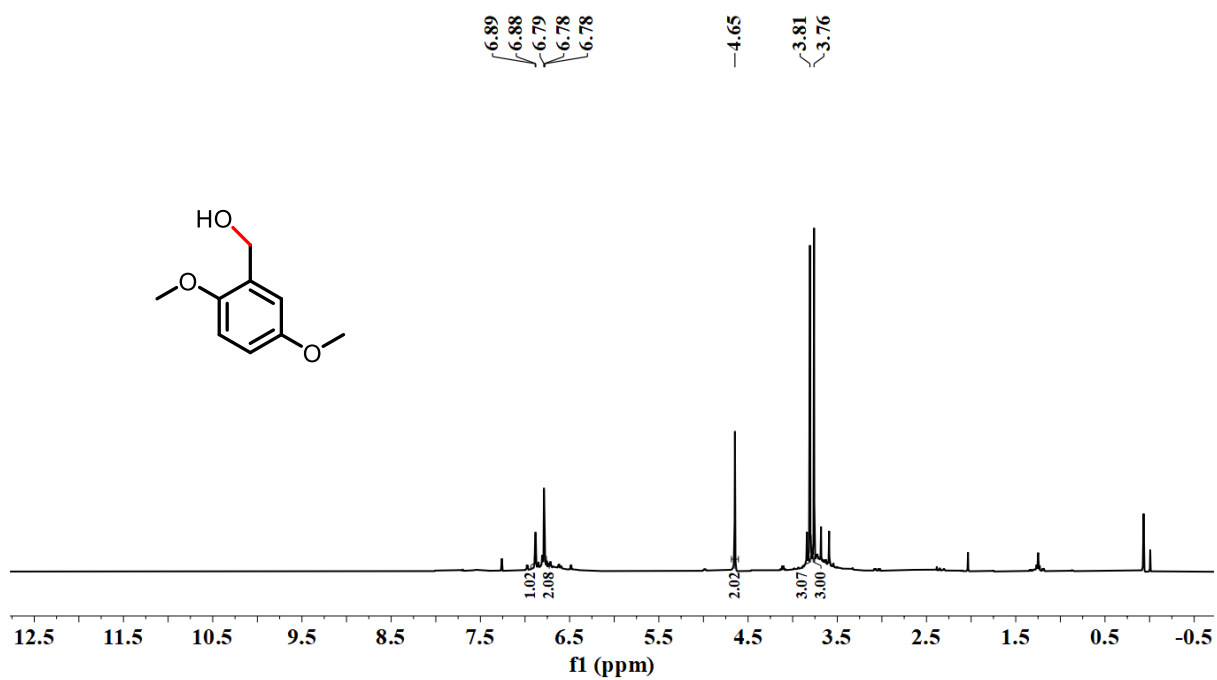

**Fig. S120.** <sup>1</sup>H NMR spectrum of 7c in CDCl<sub>3</sub> (400 MHz).

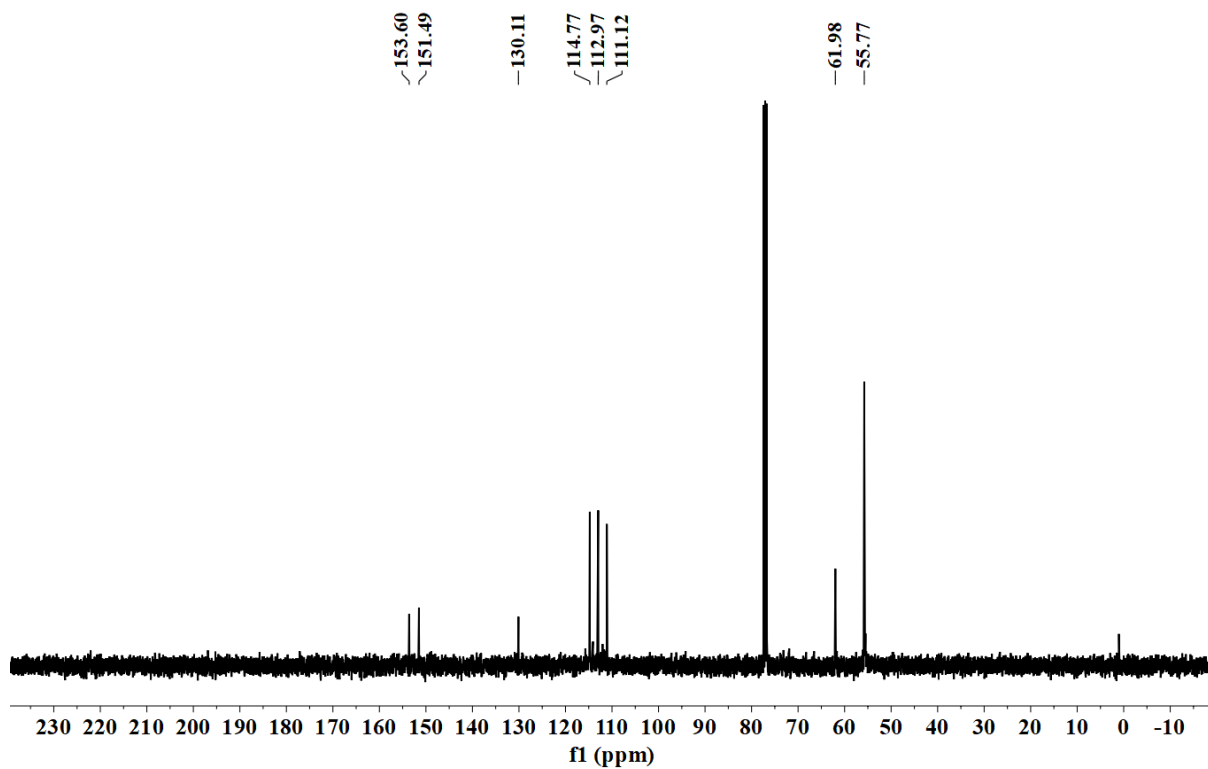

**Fig. S121.** <sup>13</sup>C {<sup>1</sup>H} NMR spectrum of 7c in CDCl<sub>3</sub> (101 MHz).

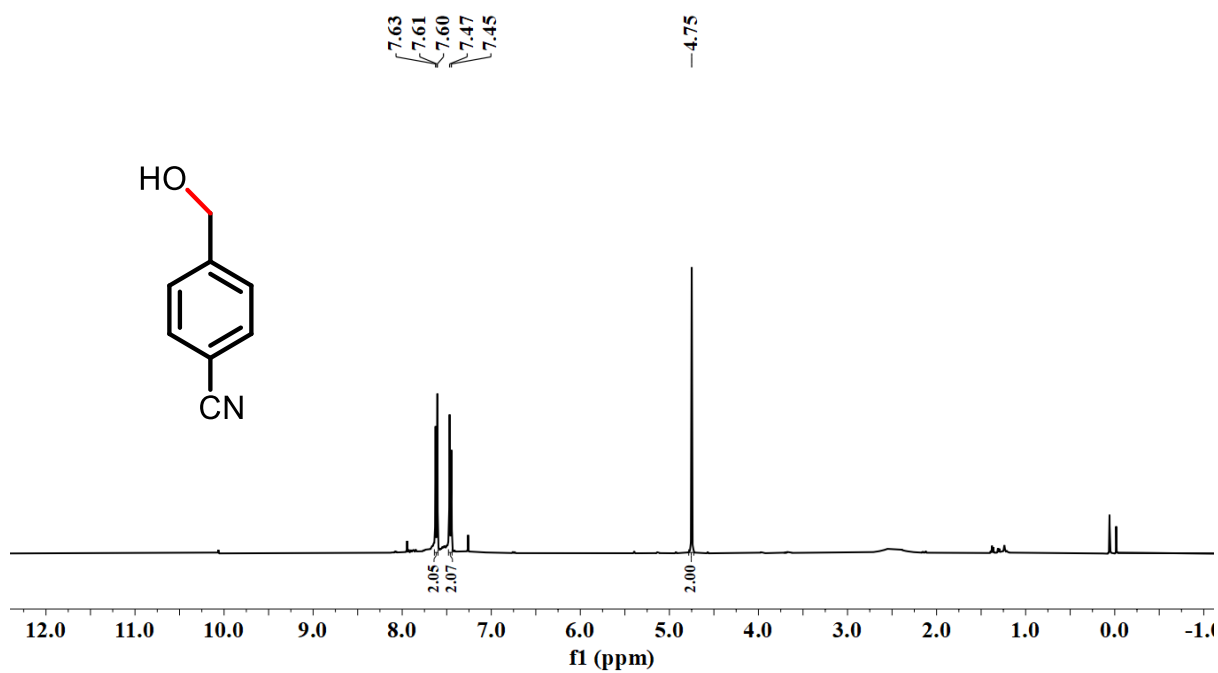

Fig. S122.  $^1\text{H}$  NMR spectrum of **8c** in  $\text{CDCl}_3$  (400 MHz).

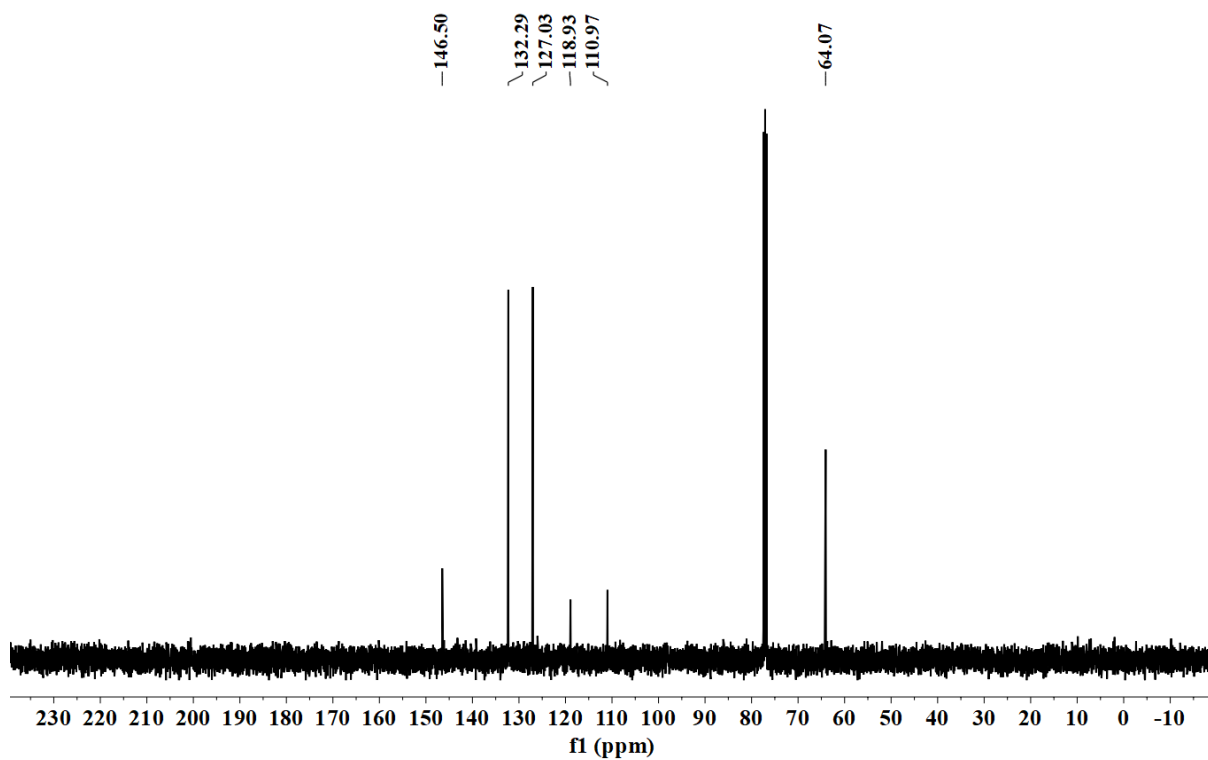

Fig. S123.  $^{13}\text{C}\{^1\text{H}\}$  NMR spectrum of **8c** in  $\text{CDCl}_3$  (101 MHz).

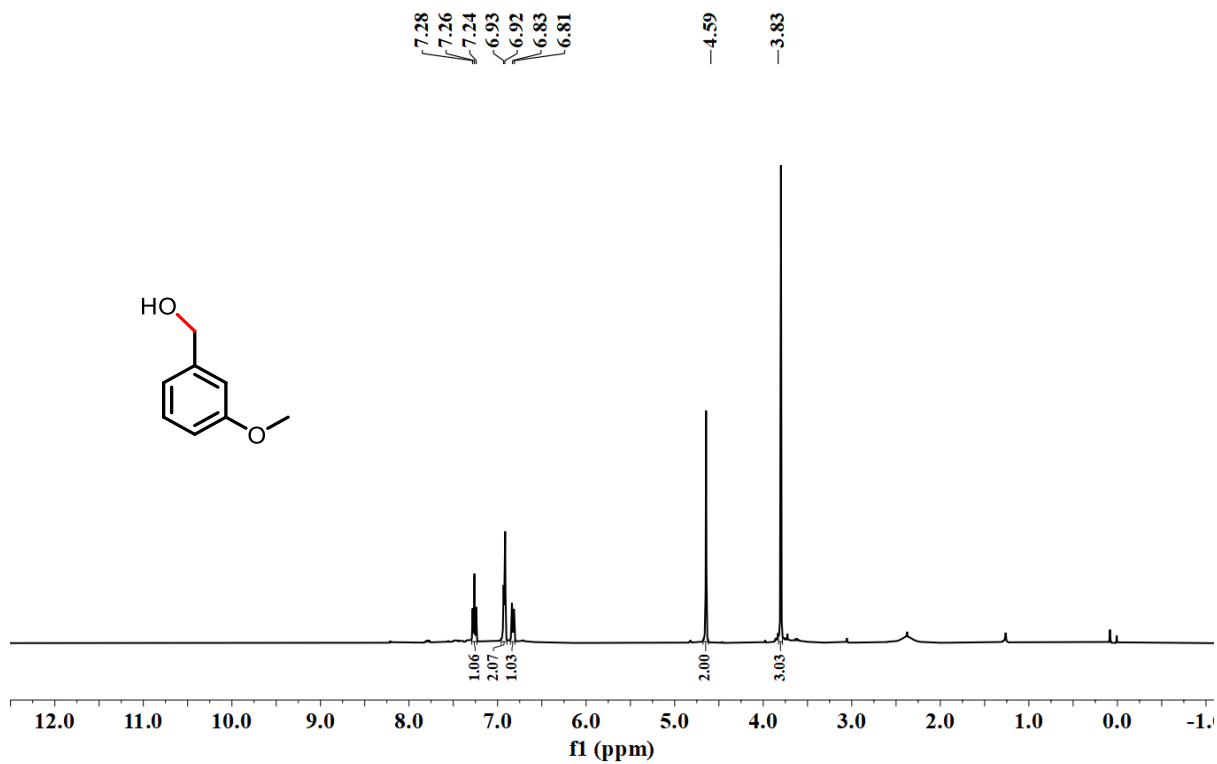

**Fig. S124.**  $^1\text{H}$  NMR spectrum of **9c** in  $\text{CDCl}_3$  (400 MHz).

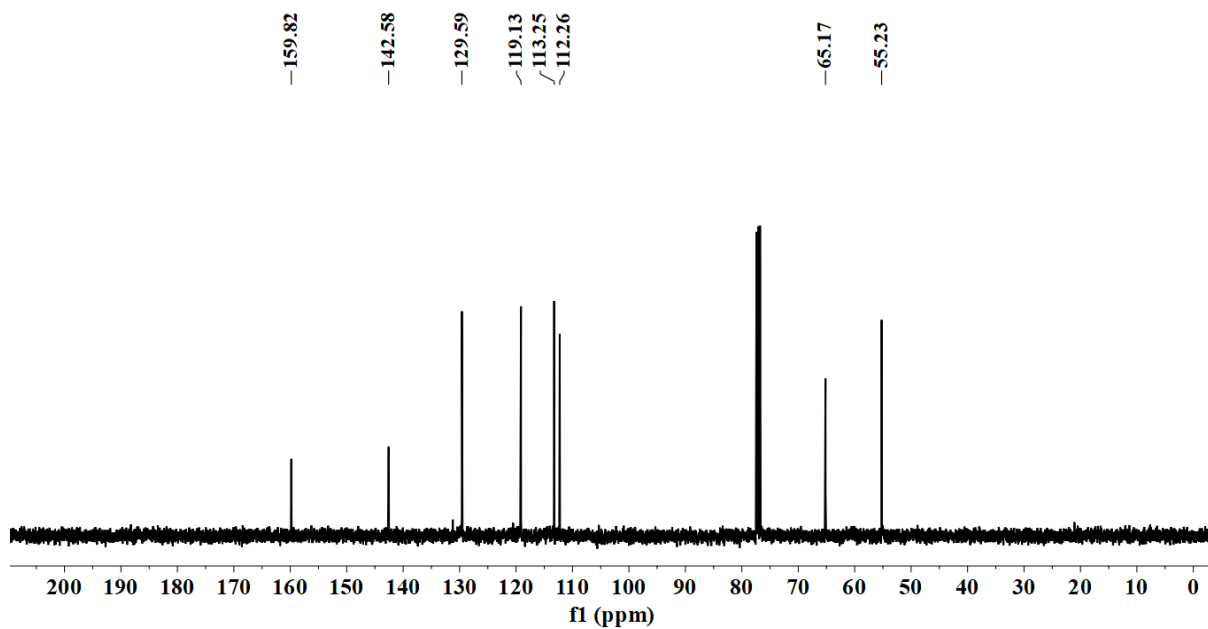

**Fig. S125.**  $^{13}\text{C}\{^1\text{H}\}$  NMR spectrum of **9c** in  $\text{CDCl}_3$  (101 MHz).

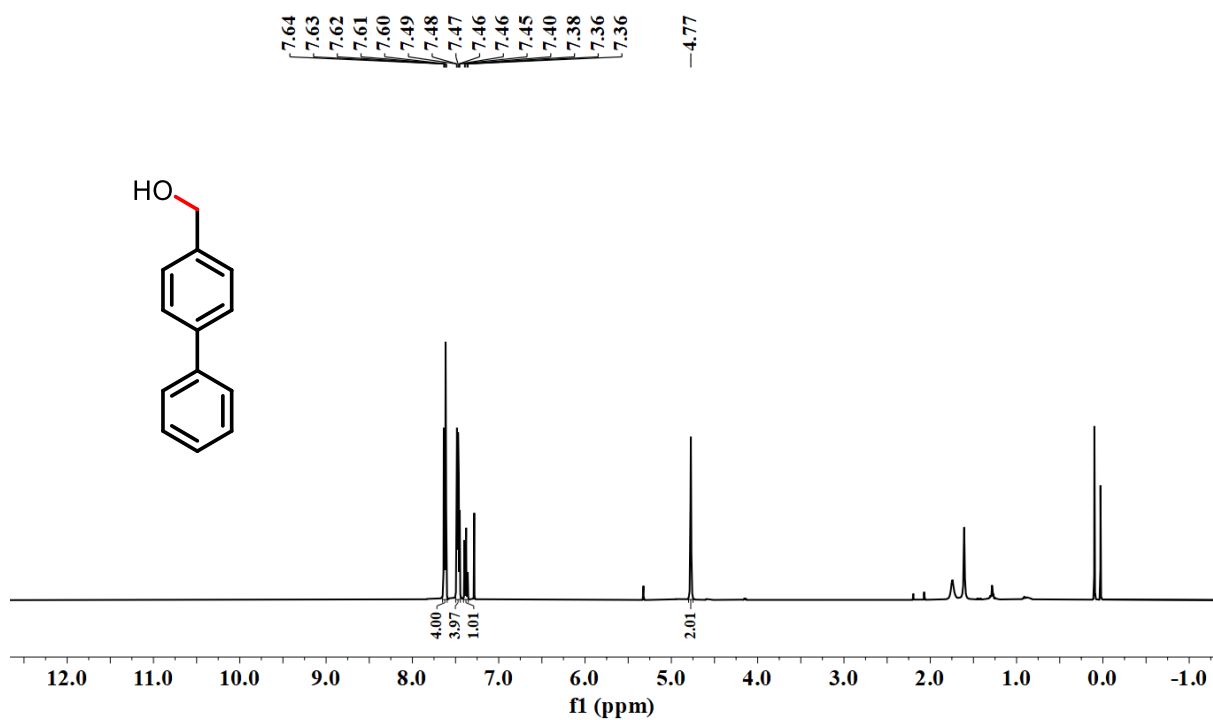

Fig. S126. <sup>1</sup>H NMR spectrum of 10c in CDCl<sub>3</sub> (400 MHz).

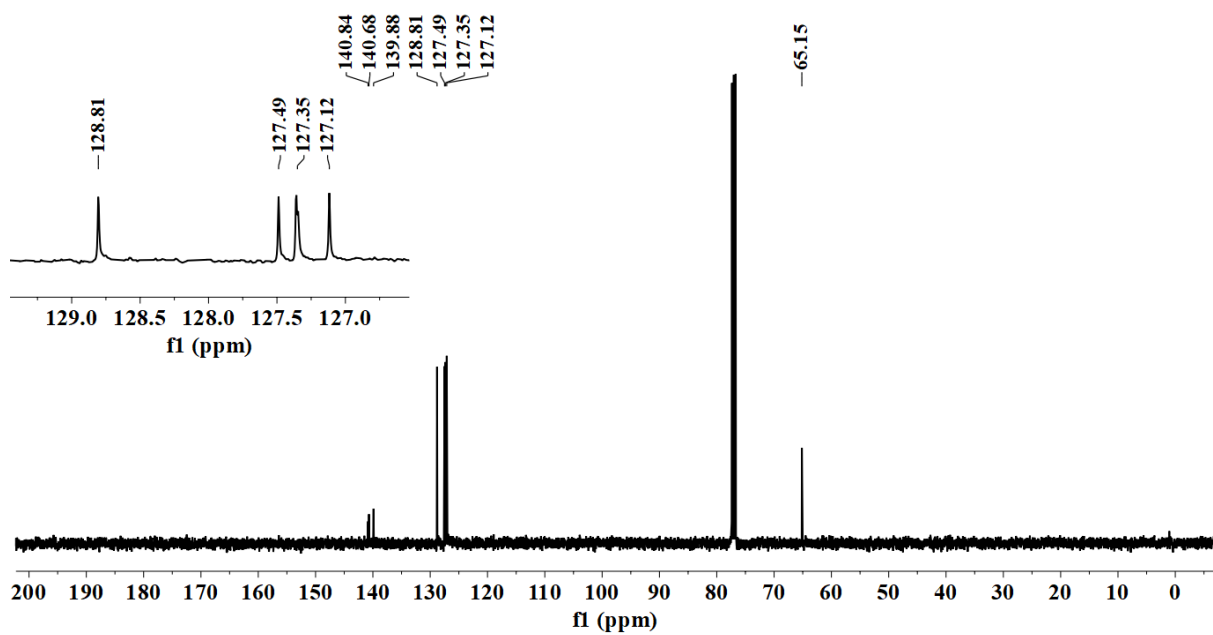

Fig. S127. <sup>13</sup>C {<sup>1</sup>H} NMR spectrum of 10c in CDCl<sub>3</sub> (101 MHz).

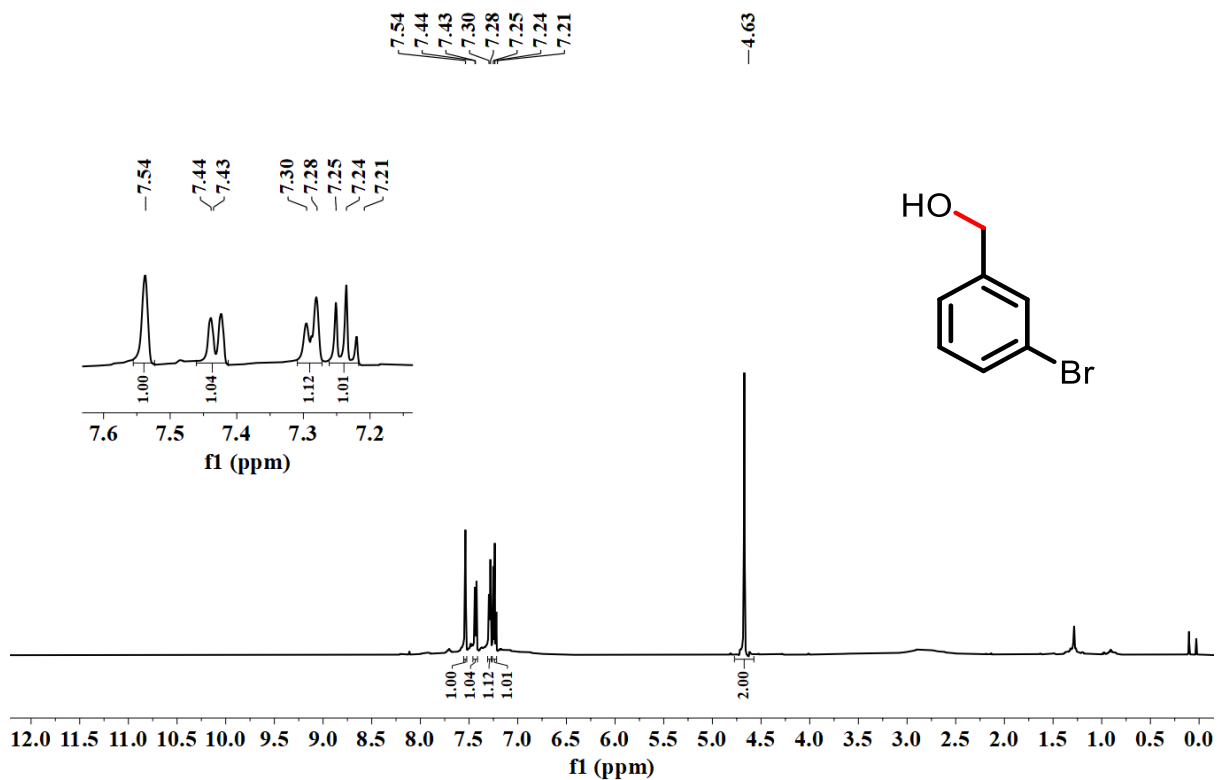

**Fig. S128.**  $^1\text{H}$  NMR spectrum of 11c in  $\text{CDCl}_3$  (500 MHz).

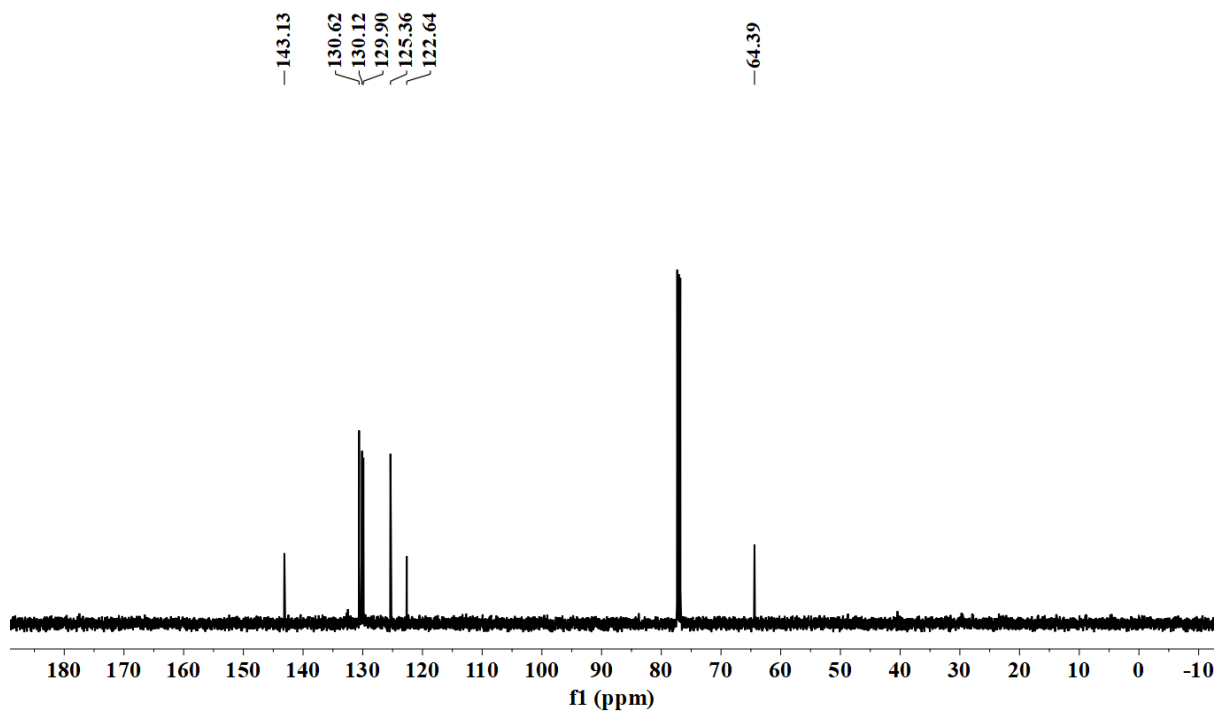

**Fig. S129.**  $^{13}\text{C}$   $\{^1\text{H}\}$  NMR spectrum of 11c in  $\text{CDCl}_3$  (126 MHz).

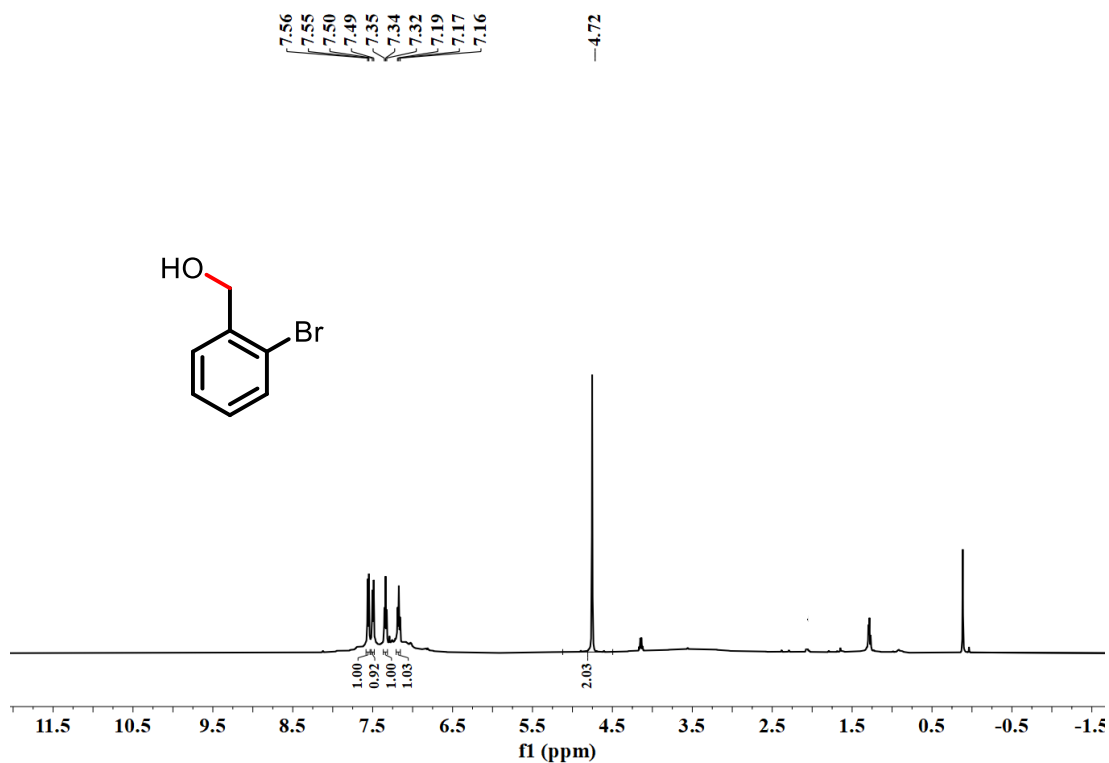

Fig. S130. <sup>1</sup>H NMR spectrum of 12c in CDCl<sub>3</sub> (500 MHz).

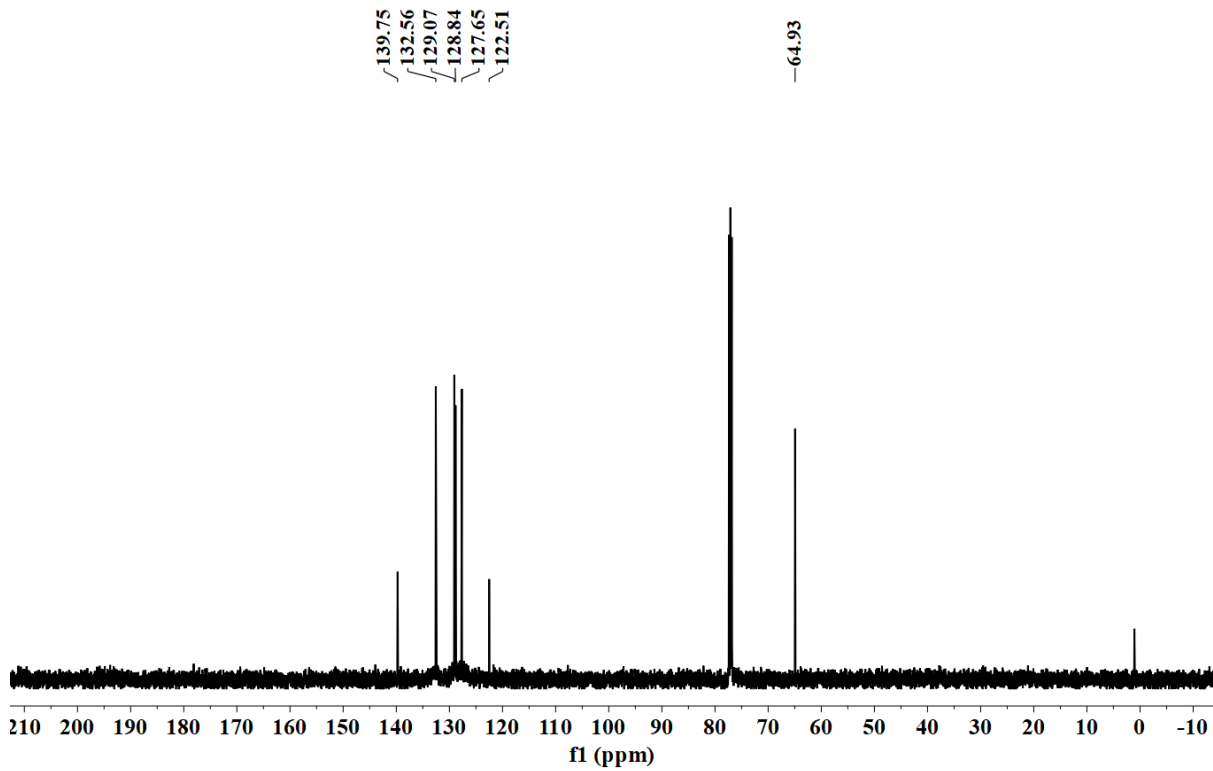

Fig. S131. <sup>13</sup>C{<sup>1</sup>H} NMR spectrum of 12c in CDCl<sub>3</sub> (126 MHz).

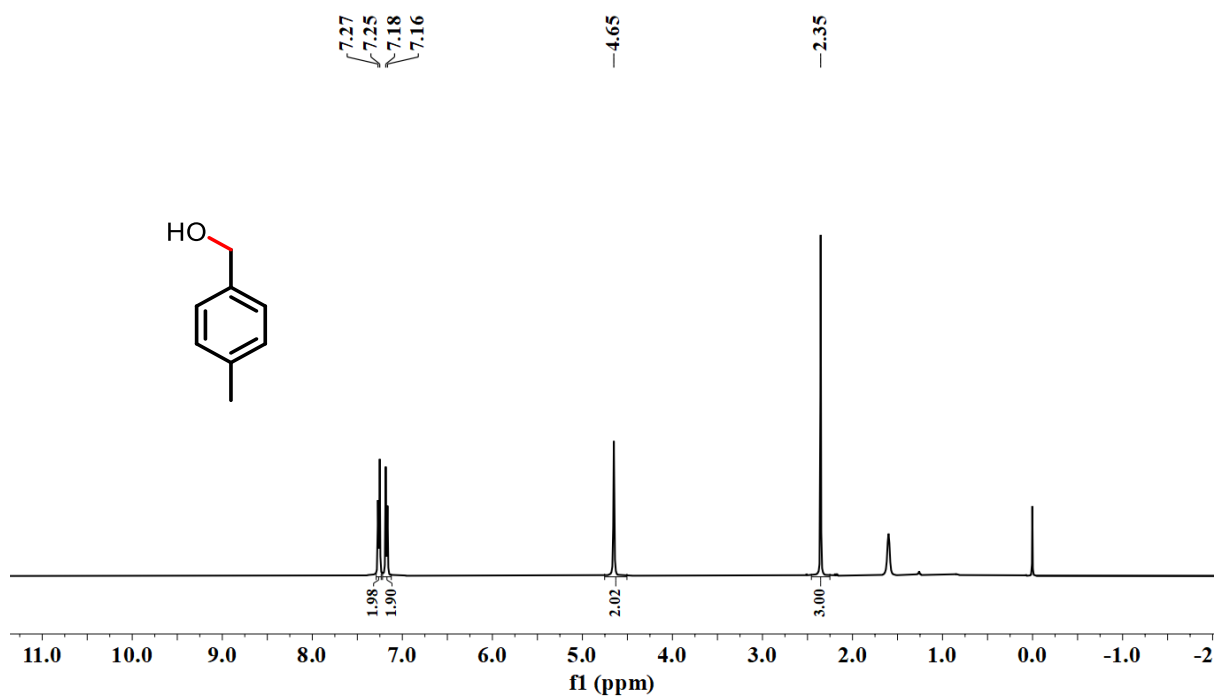

Fig. S132.  $^1\text{H}$  NMR spectrum of **13c** in  $\text{CDCl}_3$  (400 MHz).

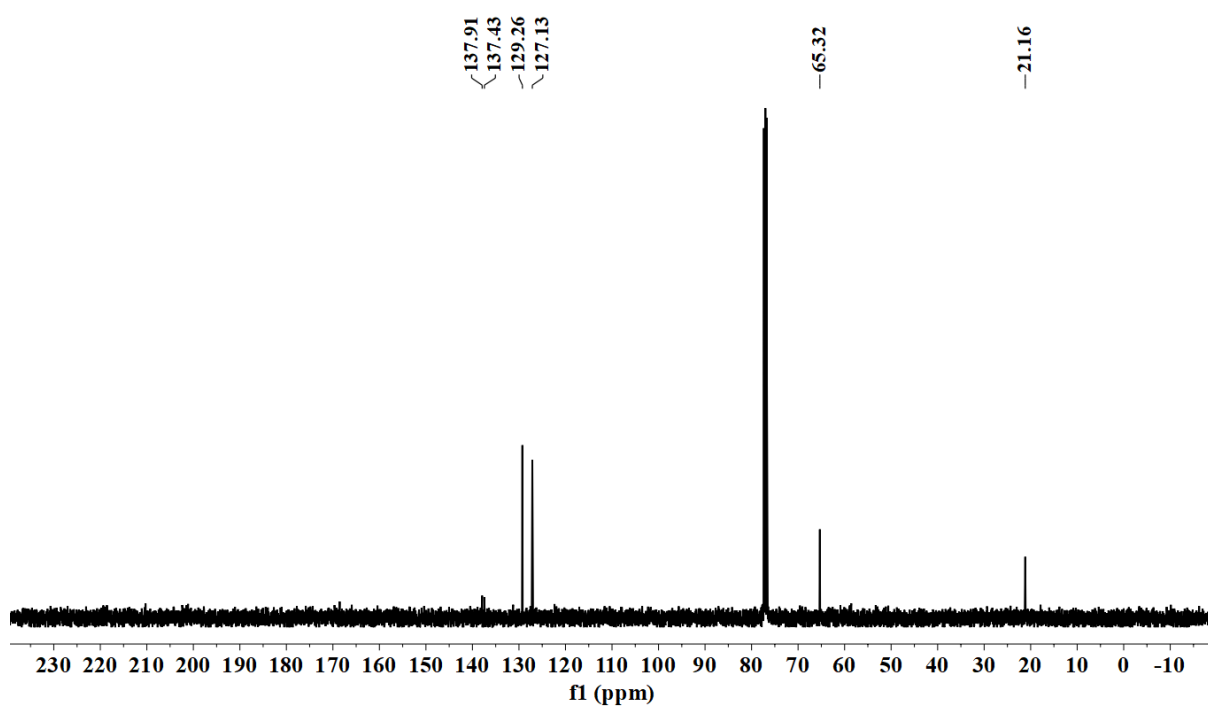

Fig. S133.  $^{13}\text{C}\{^1\text{H}\}$  NMR spectrum of **13c** in  $\text{CDCl}_3$  (101 MHz).



## References:

1. Z. Li, C. Brouwer and C. He, *Chem. Rev.*, 2008, **108**, 3239-3265.
2. O. V. Dolomanov, L. J. Bourhis, R. J. Gildea, J. A. K. Howard and H. Puschmann, *J. Appl. Cryst.*, 2009, **42**, 339-341.
3. G. Sheldrick, *Acta Crystallographica Section A*, 2015, **71**, 3-8.
4. C. Zhang, B. Hu, D. Chen and H. Xia, *Organometallics*, 2019, **38**, 3218-3226.
5. S. Nandi, I. Borthakur, K. Ganguli and S. Kundu, *Organometallics*, 2023, **42**, 1793-1802.
6. A. Maji, A. Singh, N. Singh and K. Ghosh, *ChemCatChem* 2020, **12**, 3108-3125.
7. K. Patra, A. Bhattacharya, C. Li, J. K. Bera and H. S. Soo, *ACS Catal.*, 2022, **12**, 15168-15180.
8. A. Maji, S. Gupta, M. Maji and S. Kundu, *J. Org. Chem.*, 2022, **87**, 8351-8367.
9. J. Das, K. Singh, M. Vellakkaran and D. Banerjee, *Org. Lett.*, 2018, **20**, 5587-5591.
10. D. Bhattacharyya, P. Adhikari, K. Deori and A. Das, *Catal. Sci. Technol.*, 2022, **12**, 5695-5702.
11. P. K. Namdeo, S. Sheokand, B. S. Kote, L. Radhakrishna, H. S. Kunchur, P. Saini, S. Ramakrishnan and M. S. Balakrishna, *Dalton Trans.*, 2022, **51**, 6795-6808.
12. S. Yadav, P. Vijayan, S. Yadav and R. Gupta, *Dalton Trans.*, 2021, **50**, 3269-3279.
13. M. Segizbayev, Ö. Öztopçu, D. Hayrapetyan, D. Shakhman, K. A. Lyssenko and A. Y. Khalimon, *Dalton Trans.*, 2020, **49**, 11950-11957.
